# Supplementary material for: Analogues of Muraymycin Nucleoside Antibiotics with Epimeric Uridine-Derived Core Structures
Source: MDPI journal article supplement (doi:10.3390/molecules23112868), 2018-11-03
Supplement: s1 [file s1]

## Supplementary Materials

### **Analogues of muraymycin nucleoside antibiotics with epimeric uridine-derived core structures**

**Anatol P. Spork<sup>2,§</sup>, Stefan Koppermann<sup>1,§</sup>, Stephanie Schier (née Wohnig)<sup>1,2</sup>, Ruth Linder<sup>1,2</sup> and Christian Ducho<sup>1,2,\*</sup>**

<sup>1</sup> Saarland University, Department of Pharmacy, Pharmaceutical and Medicinal Chemistry, Campus C2 3, 66 123 Saarbrücken, Germany

<sup>2</sup> Georg-August-University Göttingen, Department of Chemistry, Institute of Organic and Biomolecular Chemistry, Tammannstr. 2, 37 077 Göttingen, Germany

Corresponding author \*E-mail: christian.ducho@uni-saarland.de

#### **Table of contents**

|                                                                                               |     |
|-----------------------------------------------------------------------------------------------|-----|
| Analysis of peptide units using Marfey's reagent.....                                         | S2  |
| <sup>1</sup> H, <sup>13</sup> C and <sup>19</sup> F NMR spectra of synthesized compounds..... | S14 |
| References.....                                                                               | S59 |

### Analysis of peptide units using Marfey's reagent

Peptide coupling of uridine-derived building blocks **19-22** with the urea tripeptide **18** and subsequent global deprotection gave two compounds in each of these two-step transformations. Each such pair of compounds showed identical masses and could be separated by preparative HPLC, thus identifying them as diastereomers. We assumed that epimerization in the 2'''-position (*i.e.*, at leucine-C- $\alpha$ ) had occurred during the peptide coupling, giving rise to the formation of epimers (cf. Scheme 5 and Table 1). To confirm this assumption and assign the correct stereoconfiguration to each epimer, we used a method based on derivatization with Marfey's reagent **S1** [1], similar to an approach reported by Ichikawa, Matsuda and co-workers [2]. First, we synthesized two reference compounds **S2** and **S3** from L-configured Marfey's reagent **S1** with L-leucine and D-leucine, respectively, in the presence of base (Scheme S1). The L-L-isomer **S2** (obtained from L-leucine) showed a shorter retention time in analytical RP-HPLC relative to the D-L-isomer **S3** (obtained from D-leucine). This behaviour results from the enhanced tendency to form intramolecular H-bond interactions within **S3**, making it less polar than **S2** [1-3].

We then performed an acidic hydrolysis of the isolated muraymycin analogues **10-17** with aqueous HCl (6 M), followed by a transformation of the resultant mixture with Marfey's reagent **S1** in the presence of base (Scheme S1). This procedure should either give **S2** or **S3** as a component of the mixture, depending on the configuration of **10-17** in the 2'''-position (*i.e.*, at leucine-C- $\alpha$ ). We therefore analyzed the mixtures by RP-HPLC and additionally performed co-injection experiments. For these, we doped the samples with authentic L-leucine or D-leucine derivatives **S2** or **S3**, respectively, and demonstrated an increased peak area at the respective retention time. According RP-HPLC chromatograms are shown in Figures S1-S19.

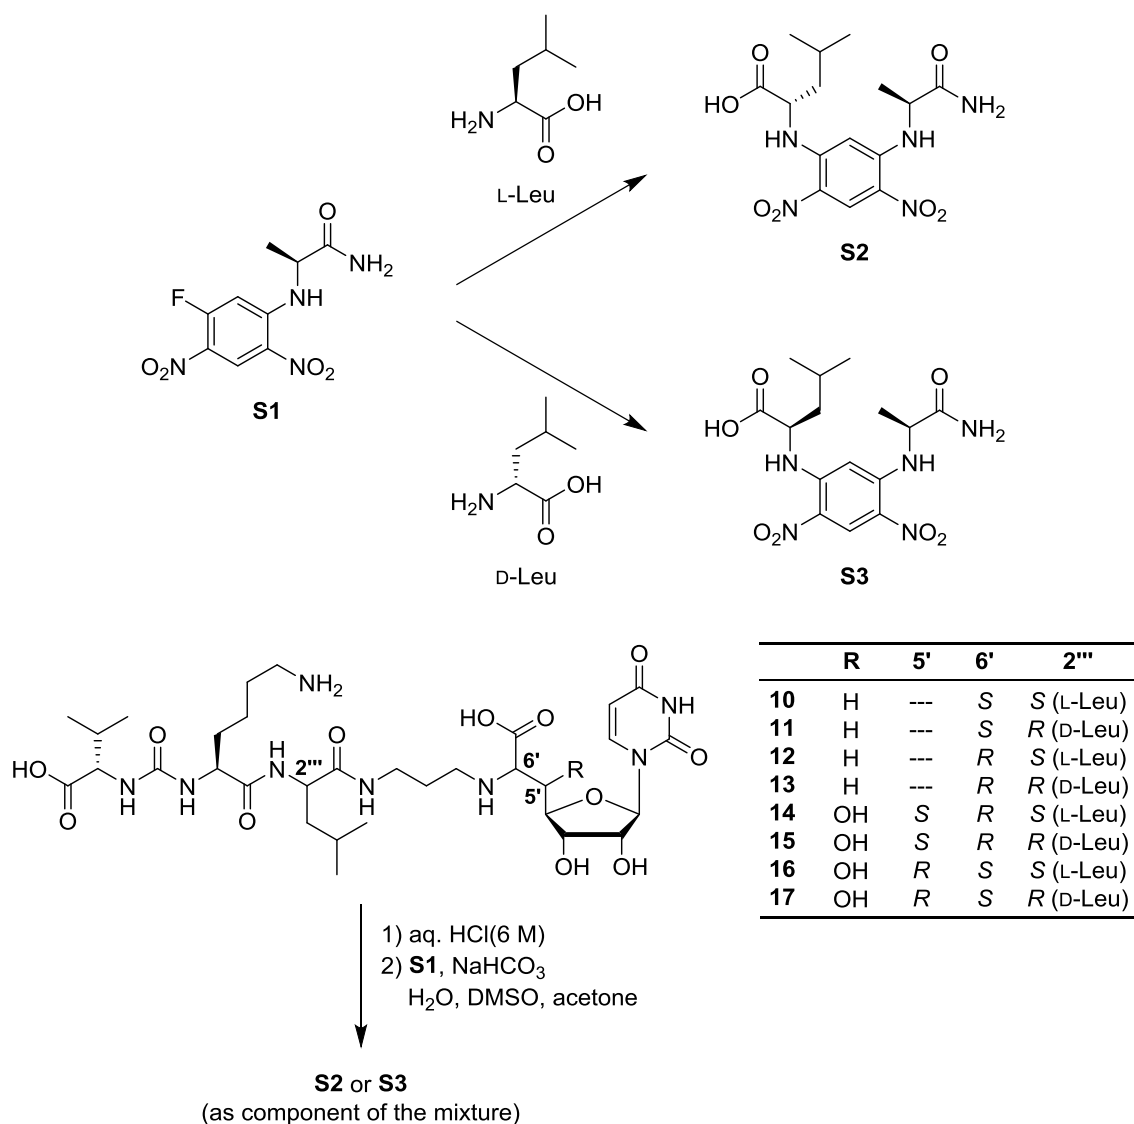

**Scheme S1.** Synthesis of authentic standards **S2** and **S3** and reaction of Marfey's reagent with hydrolyzed muraymycin analogues **10-17** for stereochemical analysis of the peptide units.

**Method for analytical HPLC.** eluent A water, eluent B MeOH; 0-15 min gradient of B (80-90%), 15-25 min 100% B, 25-30 min 80% B; flow 1 mL/min.

**Synthesis of standards S2 and S3.** In two separate reactions, to a solution of either L-leucine or D-leucine (25 mM in water, 80  $\mu$ L, 2.0  $\mu$ mol) in DMSO (15  $\mu$ L), Marfey's reagent **S1** (20 mM in acetone, 50  $\mu$ L, 1.0  $\mu$ mol) and NaHCO<sub>3</sub> (1 M in water, 5  $\mu$ L, 5  $\mu$ mol) were added

and the reaction mixture was stirred at 40 °C for 15 h. Then, HCl (1 M, 10  $\mu$ L, 10  $\mu$ mol) was added. The solvent was removed by lyophilization, and the resultant residue was dissolved in DMSO (1 mL) and analyzed by RP-HPLC ( $t_R$  = 34.6 min (**S2**),  $t_R$  = 42.3 min (**S3**)). The eluents of the analytical HPLC runs were collected and analyzed by MS to confirm the identity of the respective compounds. **S2**: MS (ESI<sup>+</sup>):  $m/z$  = 406.2 [M+Na]<sup>+</sup>. HRMS (ESI<sup>+</sup>): calcd.: 406.1333 [M+Na]<sup>+</sup>, found: 406.1316. **S3**: MS (ESI<sup>+</sup>):  $m/z$  = 406.2 [M+Na]<sup>+</sup>. HRMS (ESI<sup>+</sup>): calcd.: 406.1333 [M+Na]<sup>+</sup>, found: 406.1330.

**Analysis of the peptide units in 10-17.** A solution of the respective muraymycin analogue **10-17** (0.1 mg, 0.1  $\mu$ mol) in HCl (6 M, 200  $\mu$ L) was heated to 120 °C for 20 h. The solvent was then removed under reduced pressure, and the resultant residue was dissolved in water (80  $\mu$ L) and DMSO (15  $\mu$ L). Marfey's reagent **S1** (20 mM in acetone, 50  $\mu$ L, 1.0  $\mu$ mol) and NaHCO<sub>3</sub> (1 M in water, 5  $\mu$ L, 5  $\mu$ mol) were added and the reaction mixture was stirred at 40 °C for 16 h. Then, HCl (1 M, 10  $\mu$ L, 10  $\mu$ mol) was added. The solvent was removed by lyophilization, and the resultant residue was dissolved in DMSO (1 mL) and analyzed by RP-HPLC. The according RP-HPLC chromatograms are shown in Figures S1-S19.

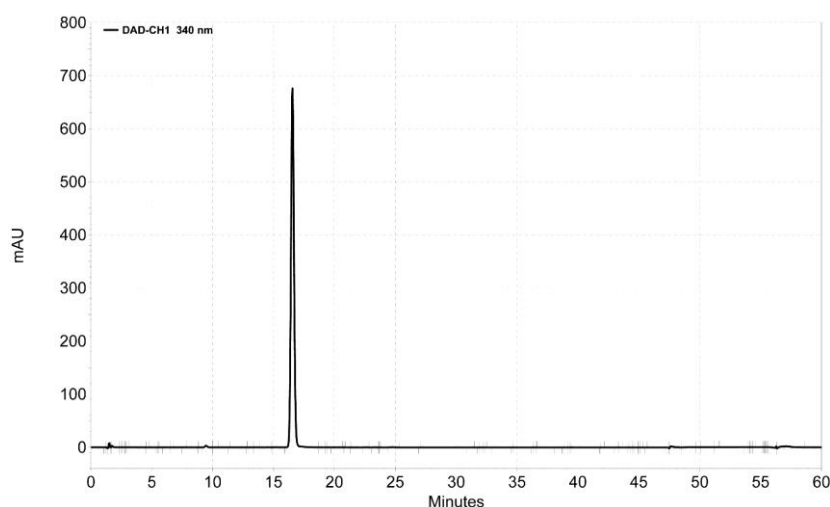

**Figure S1.** HPLC chromatogram of Marfey's reagent **S1**.

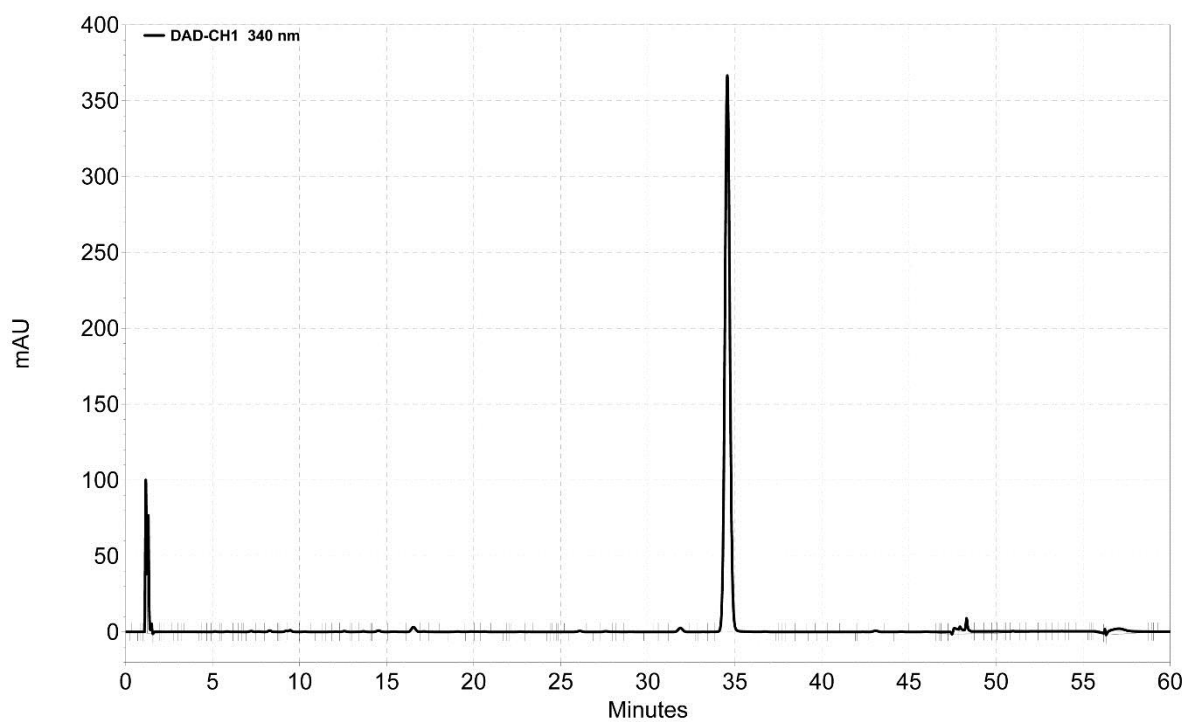

**Figure S2.** HPLC chromatogram of the L-L-configured authentic standard **S2**.

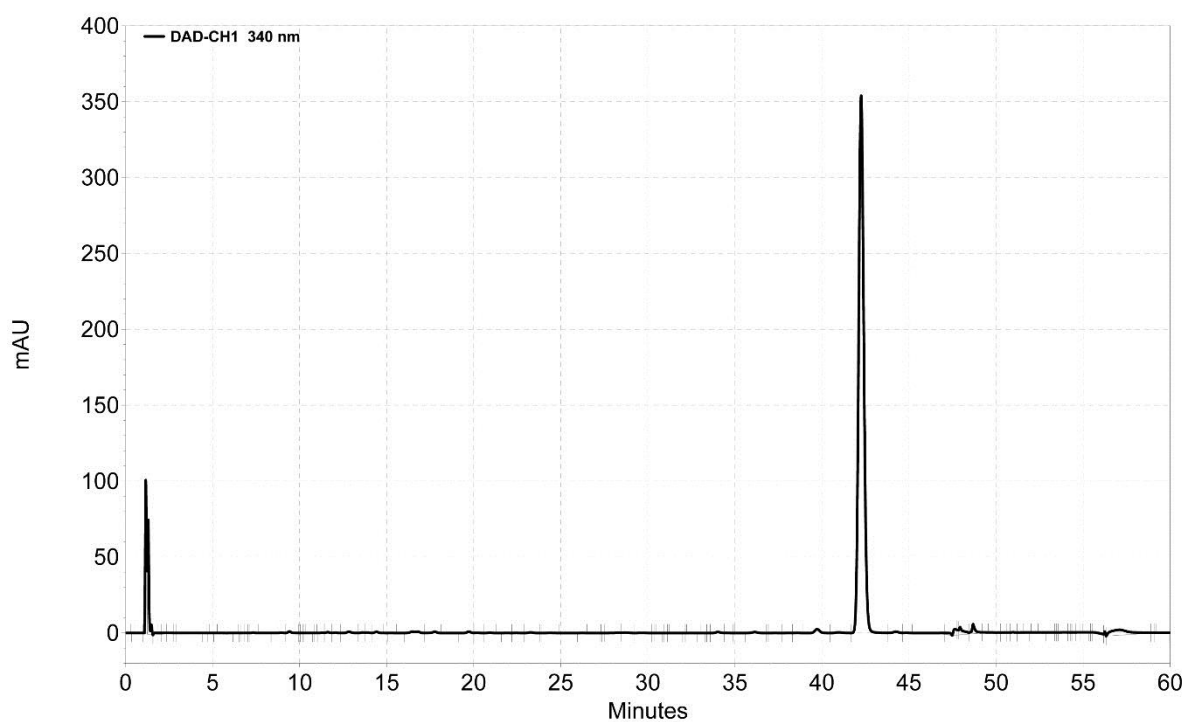

**Figure S3.** HPLC chromatogram of the D-L-configured authentic standard **S3**.

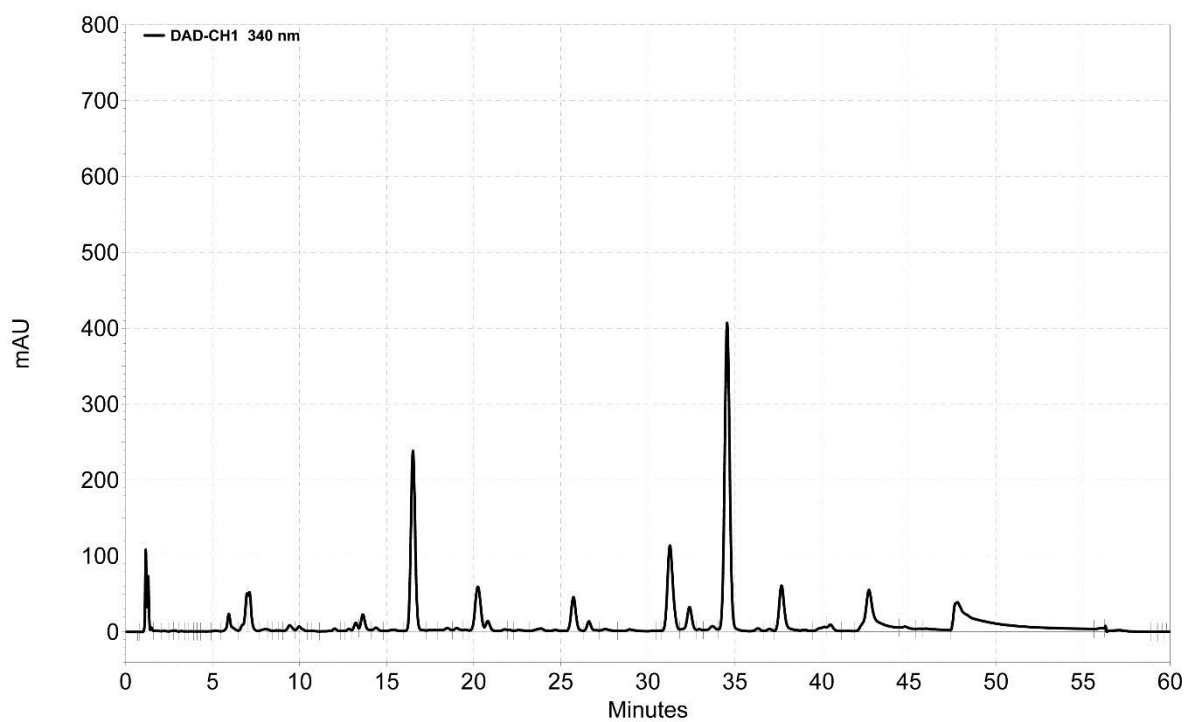

**Figure S4.** HPLC chromatogram of the mixture obtained from **10**.

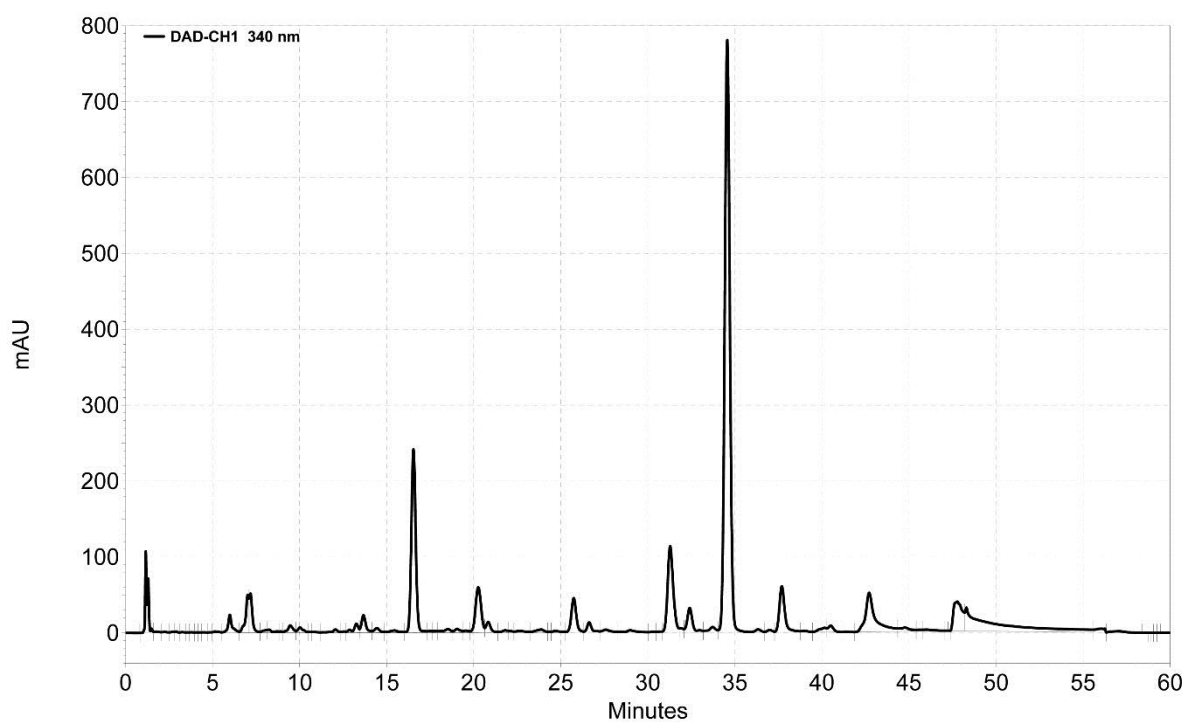

**Figure S5.** Co-injection of the mixture obtained from **10** with standard **S2**.

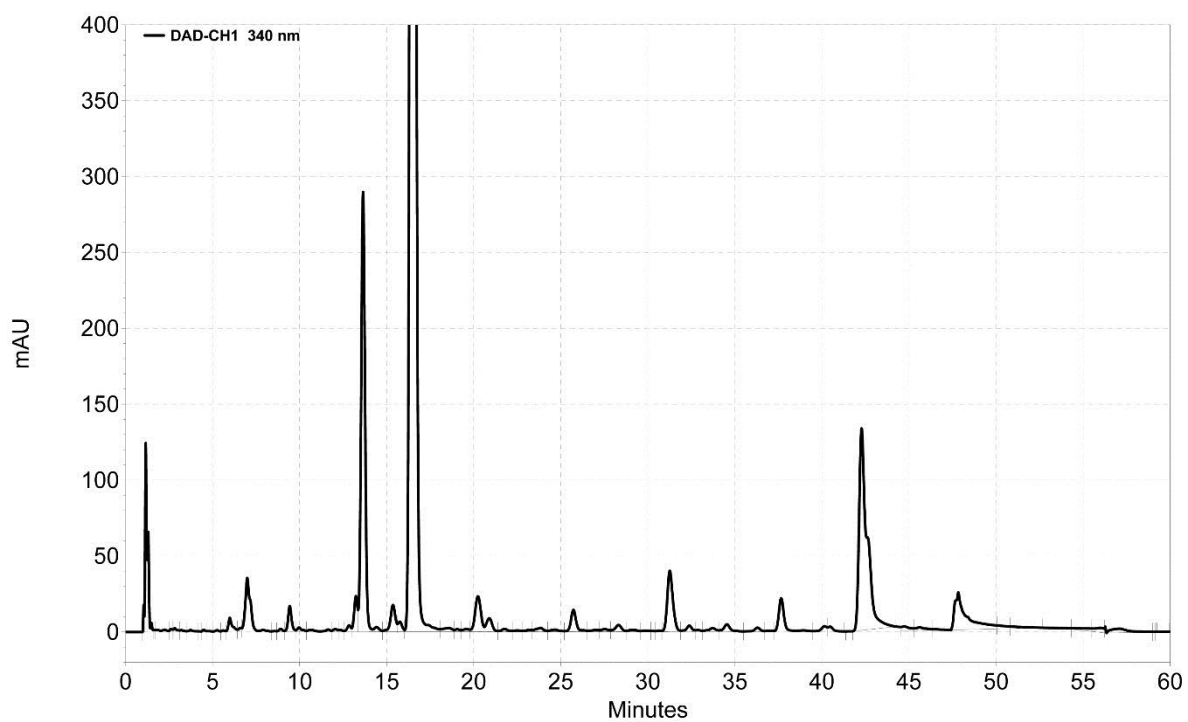

**Figure S6.** HPLC chromatogram of the mixture obtained from **11**.

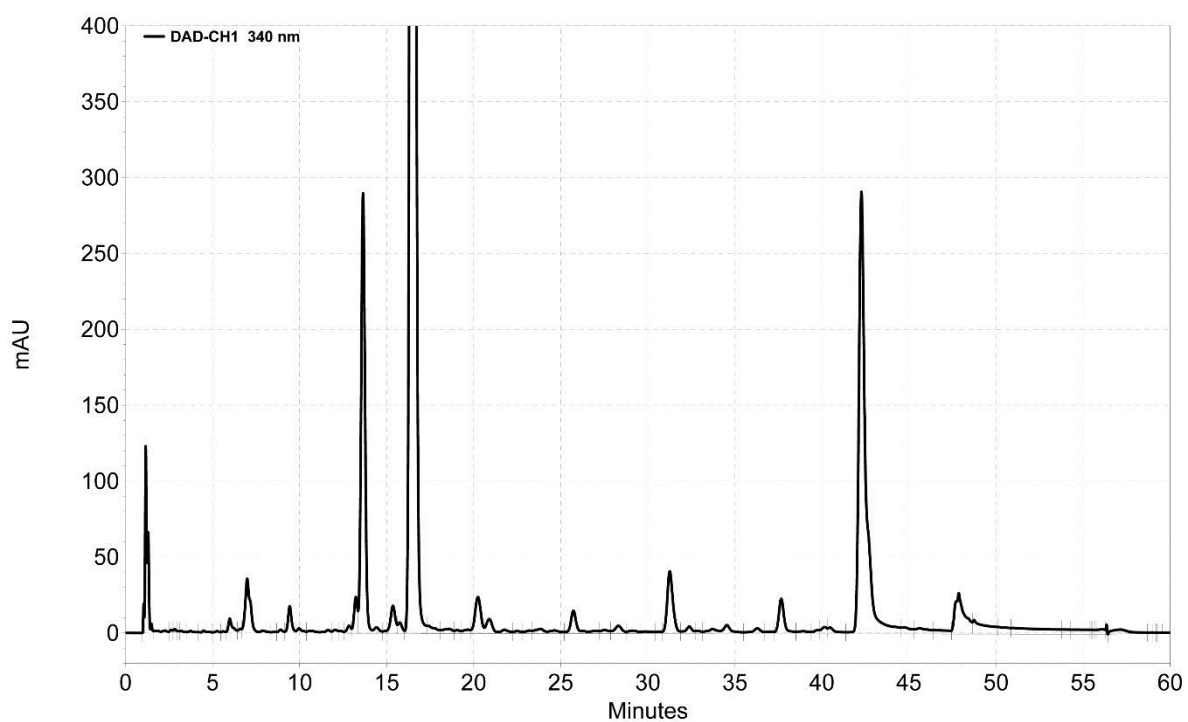

**Figure S7.** Co-injection of the mixture obtained from **11** with standard **S3**.

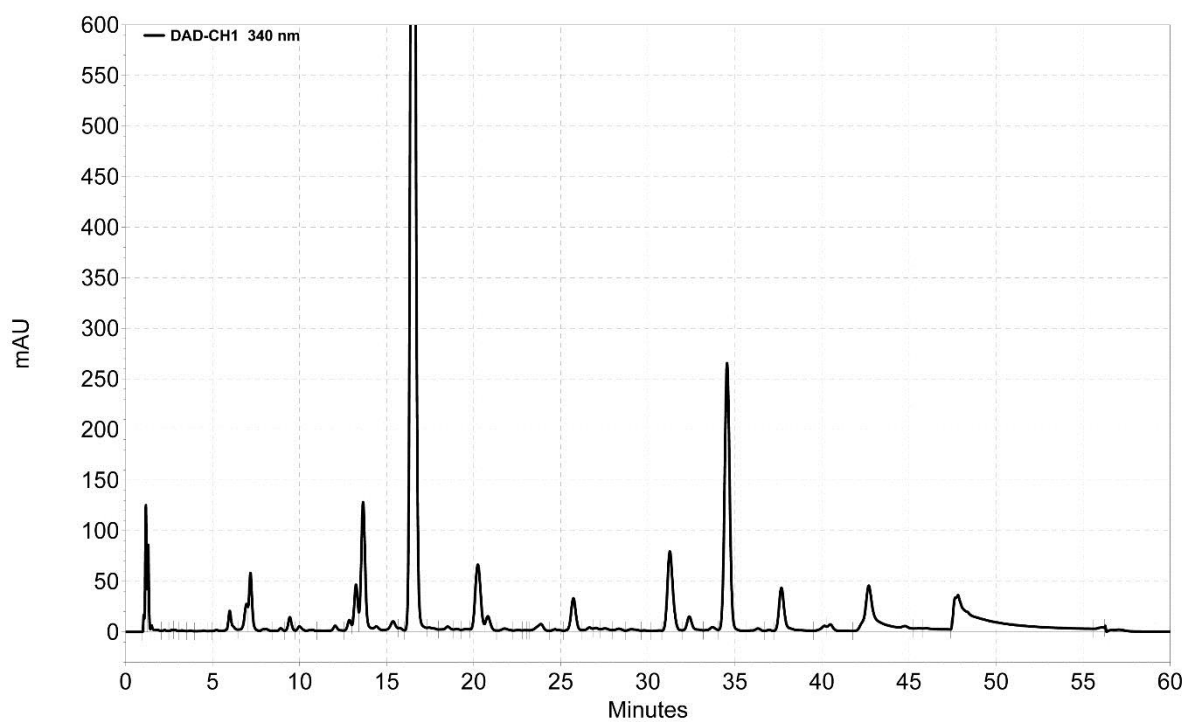

**Figure S8.** HPLC chromatogram of the mixture obtained from **12**.

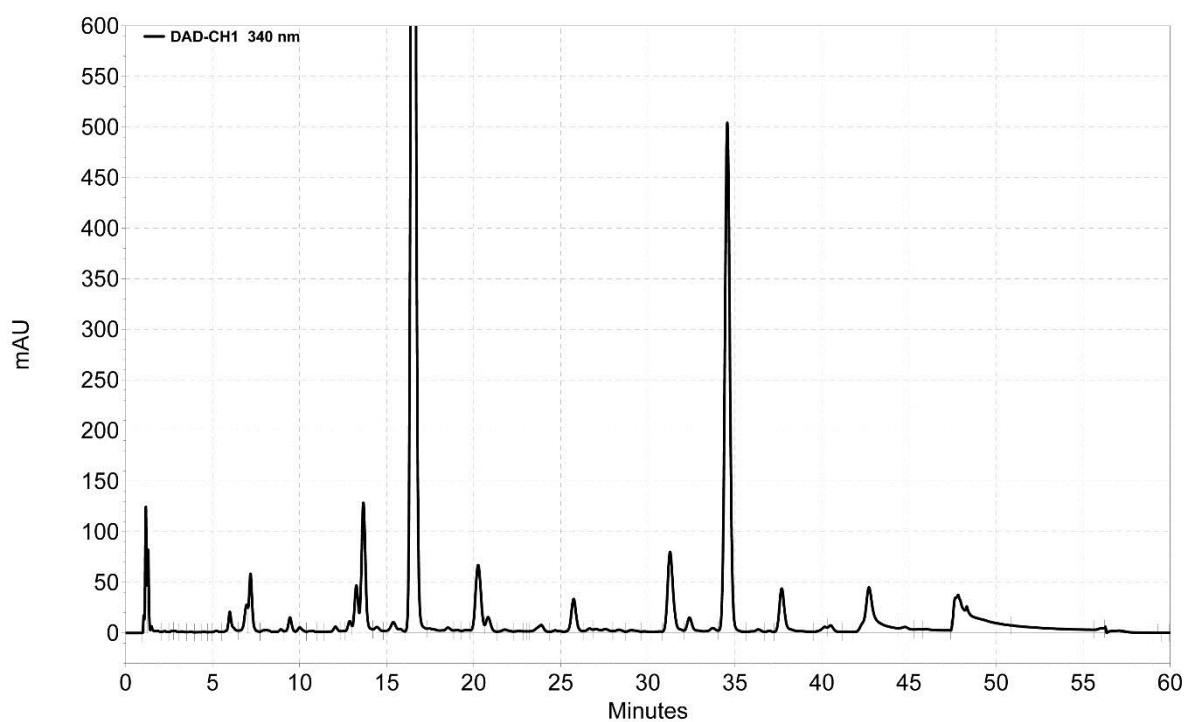

**Figure S9.** Co-injection of the mixture obtained from **12** with standard **S2**.



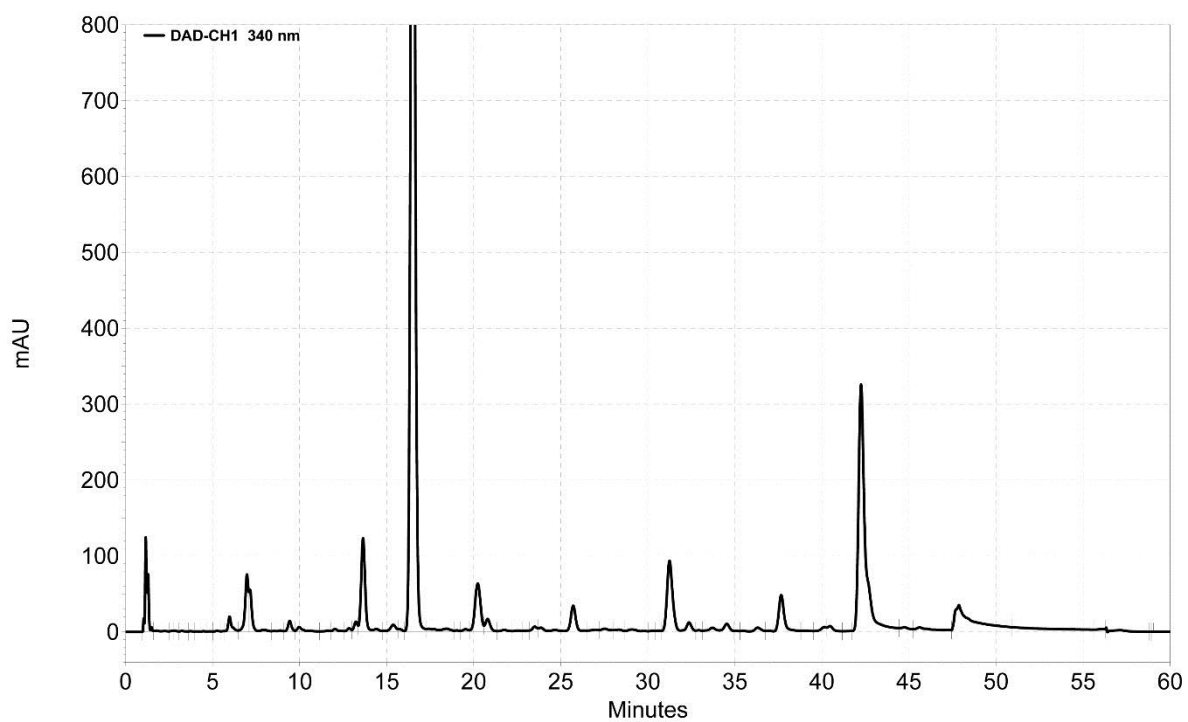

**Figure S10.** HPLC chromatogram of the mixture obtained from **13**.

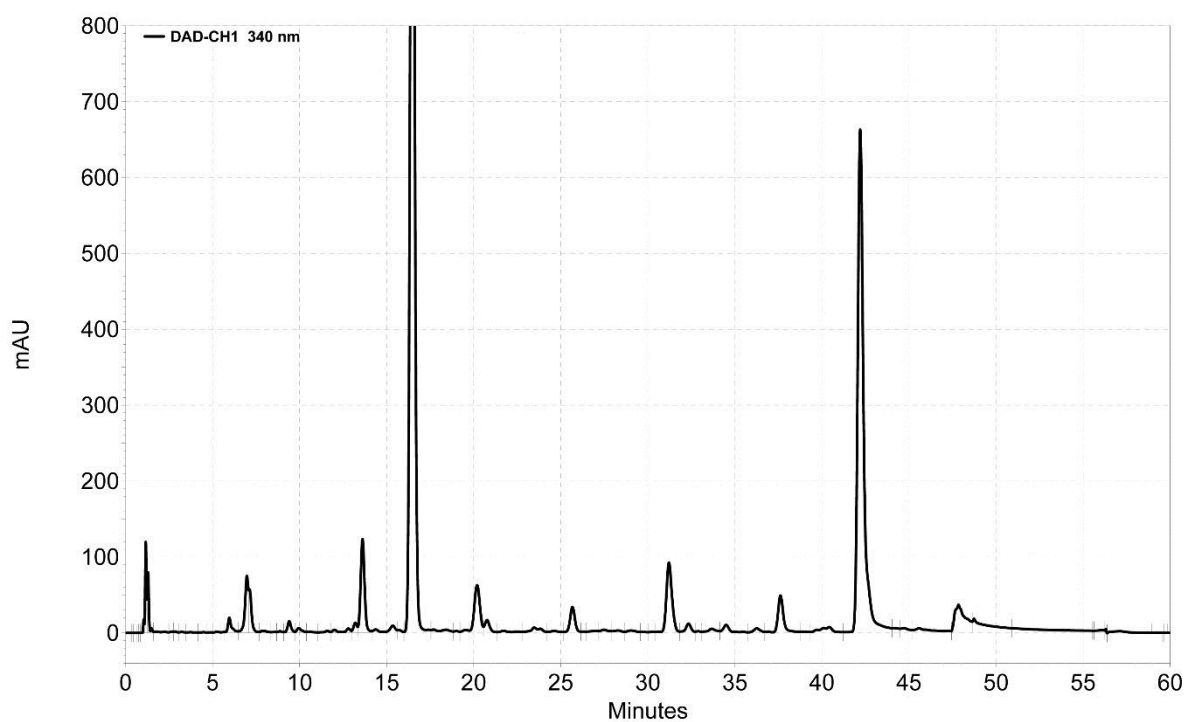

**Figure S11.** Co-injection of the mixture obtained from **13** with standard **S3**.

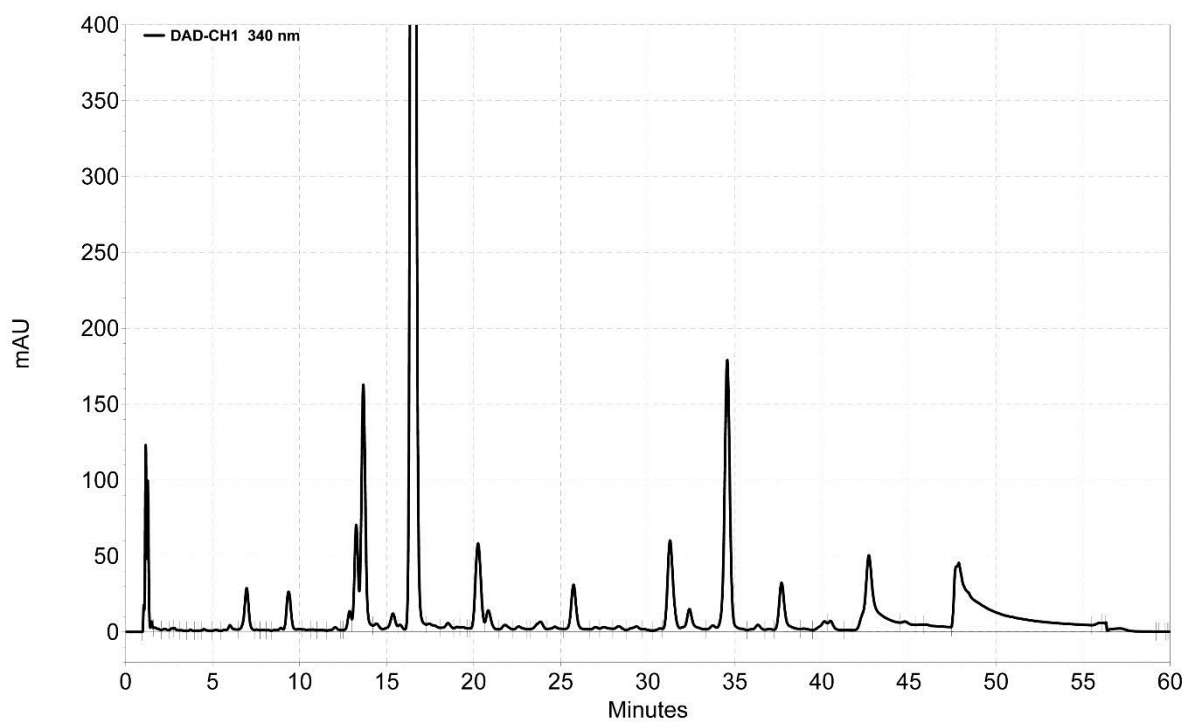

**Figure S12.** HPLC chromatogram of the mixture obtained from **14**.

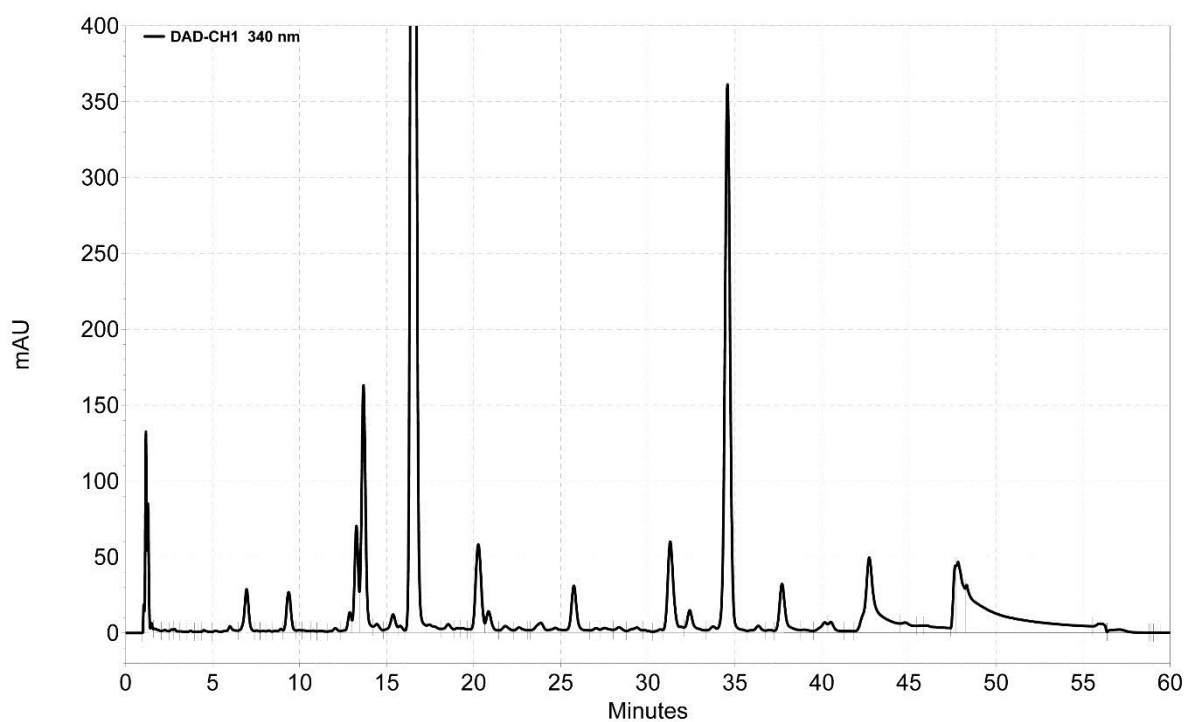

**Figure S13.** Co-injection of the mixture obtained from **14** with standard **S2**.

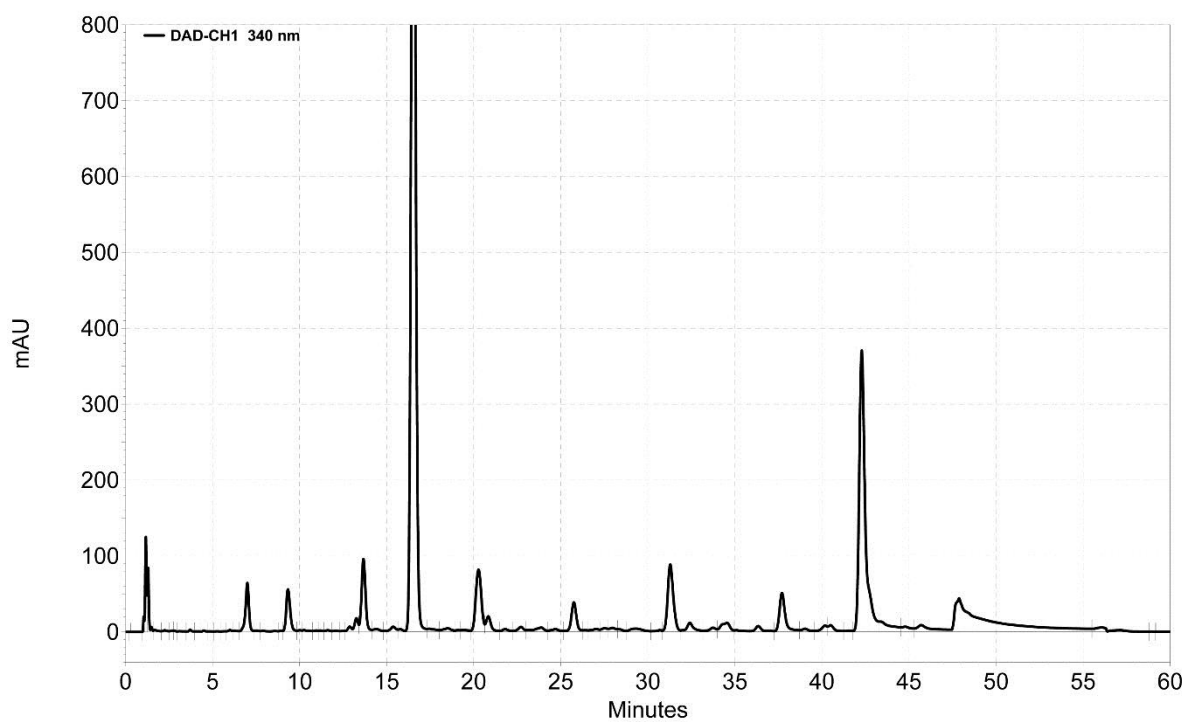

**Figure S14.** HPLC chromatogram of the mixture obtained from **15**.

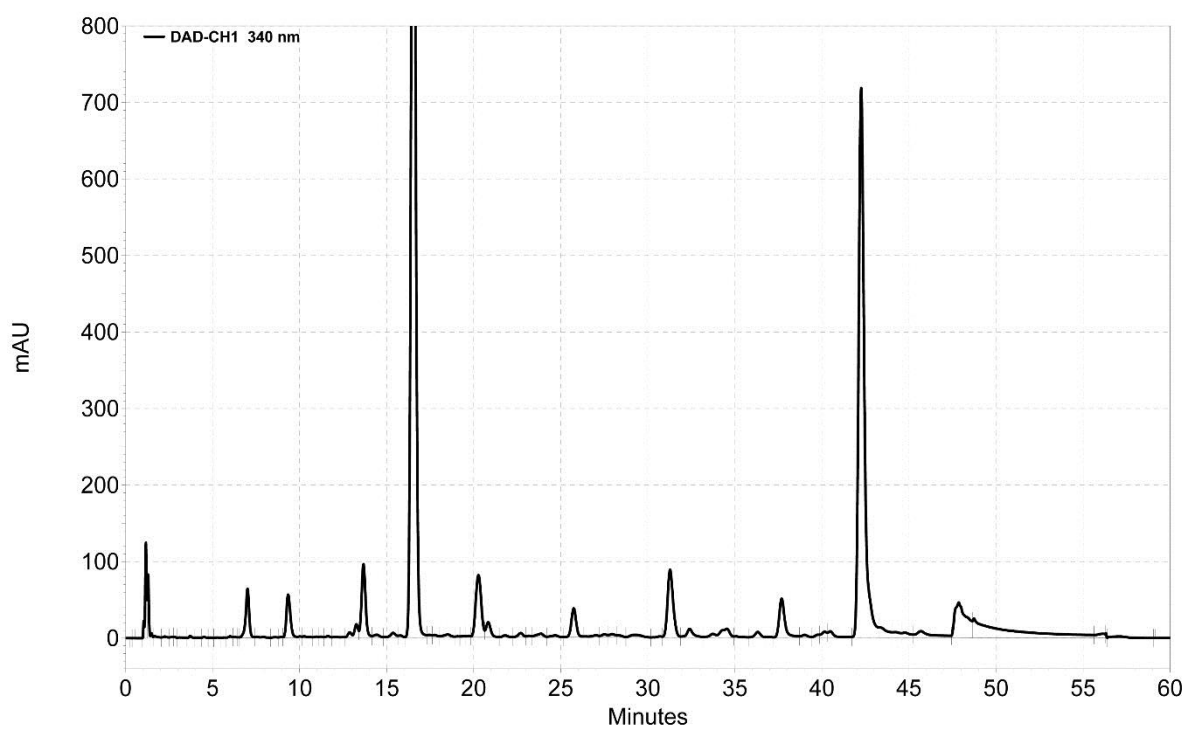

**Figure S15.** Co-injection of the mixture obtained from **15** with **S3**.

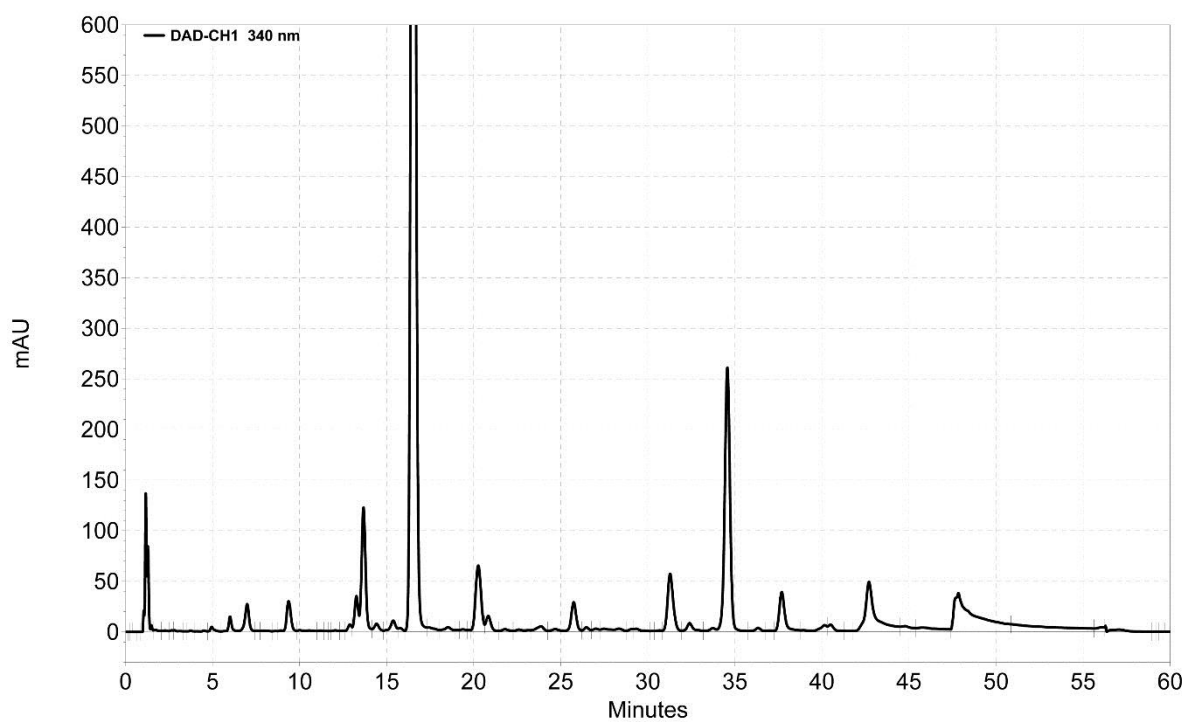

**Figure S16.** HPLC chromatogram of the mixture obtained from **16**.

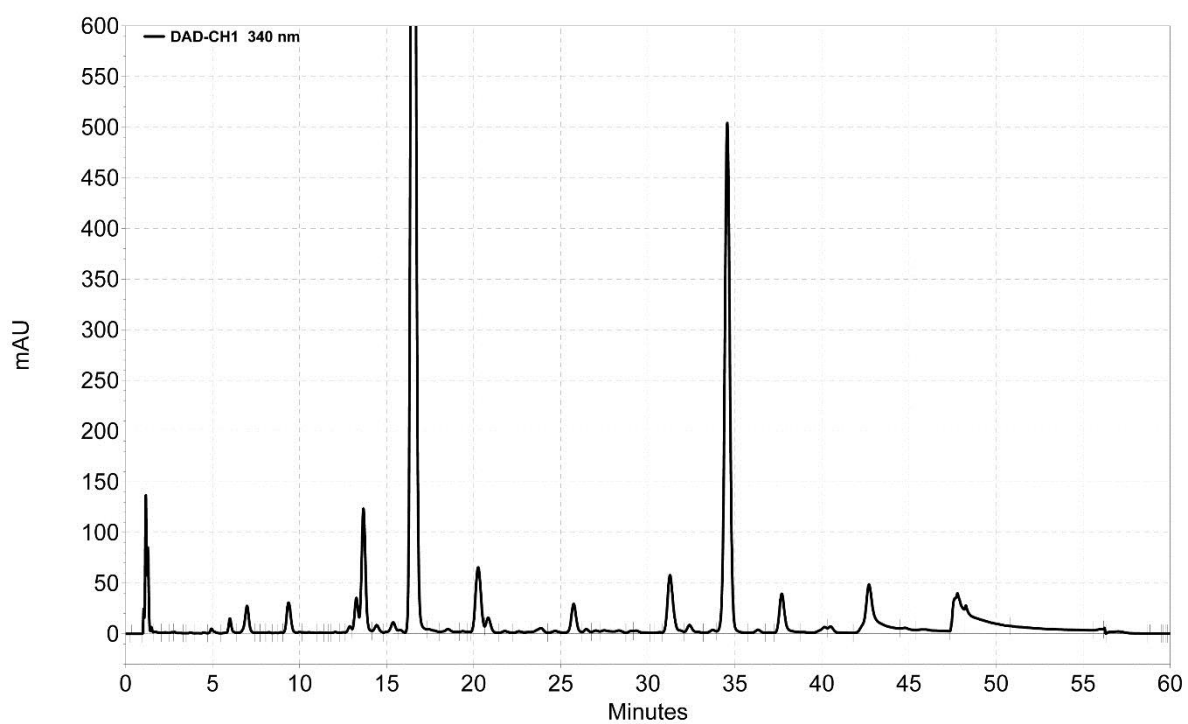

**Figure S17.** Co-injection of the mixture obtained from **16** with standard **S2**.

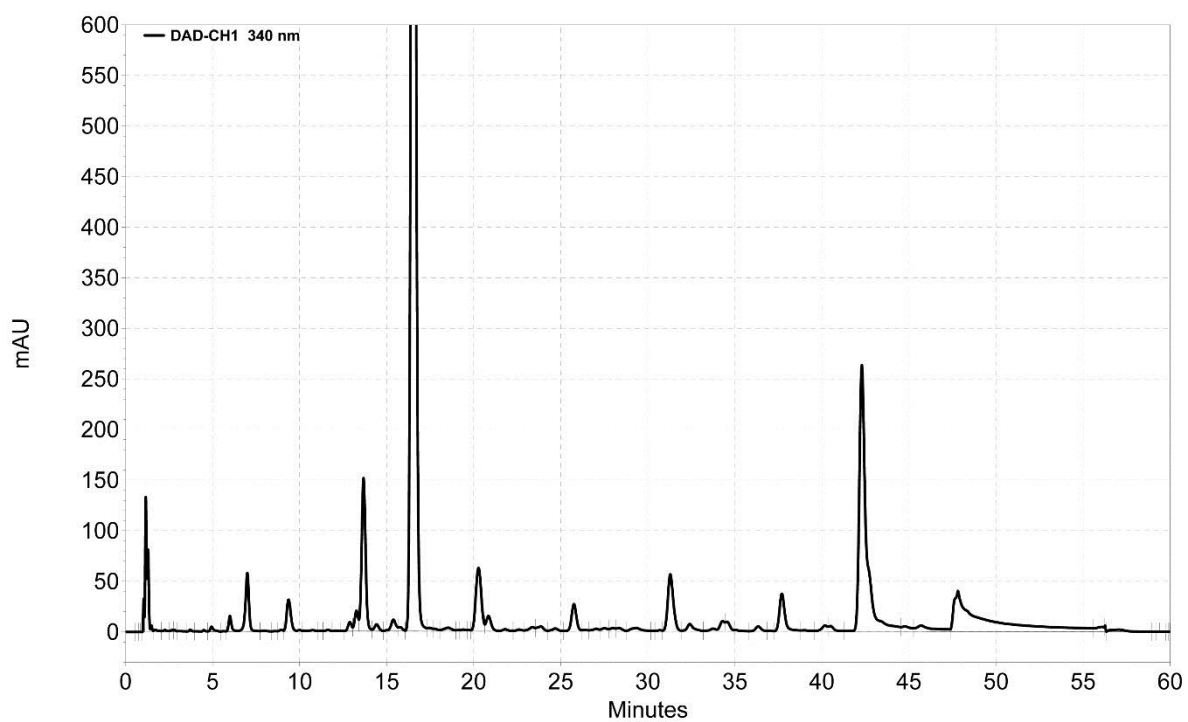

**Figure S18.** HPLC chromatogram of the mixture obtained from **17**.

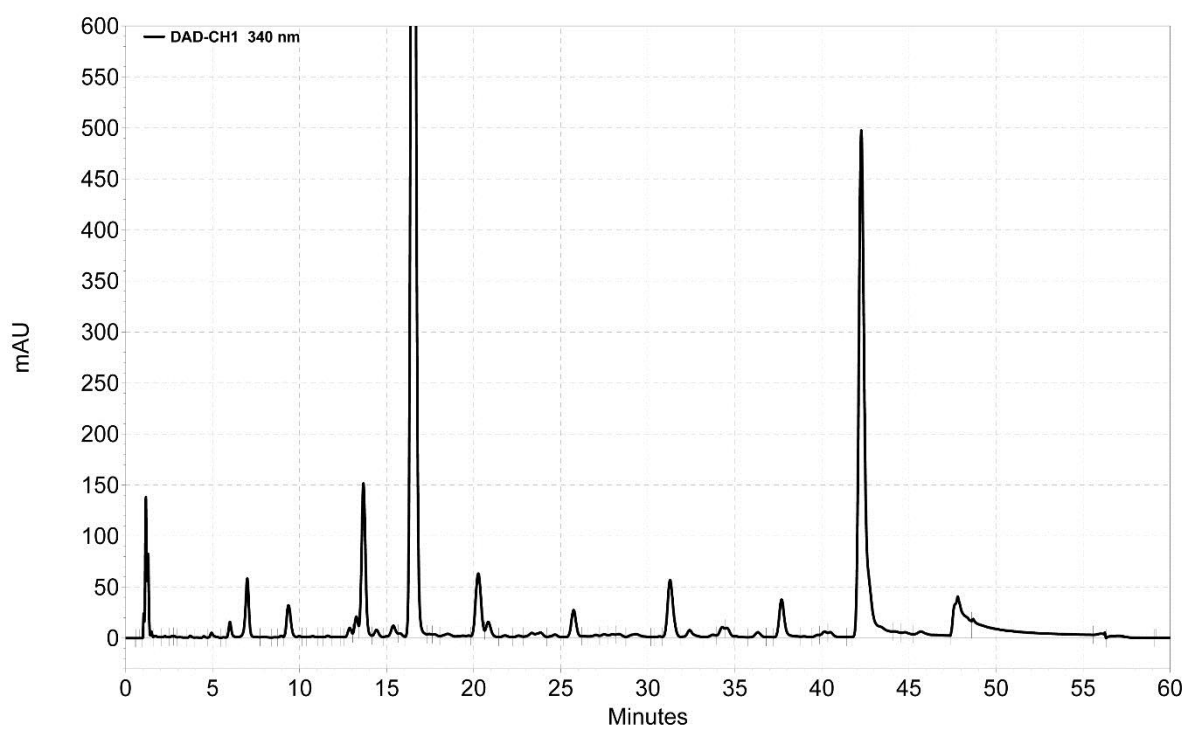

**Figure S19.** Co-injection of the mixture obtained from **17** with standard **S3**.

**$^1\text{H}$ ,  $^{13}\text{C}$  and  $^{19}\text{F}$  NMR spectra of synthesized compounds**

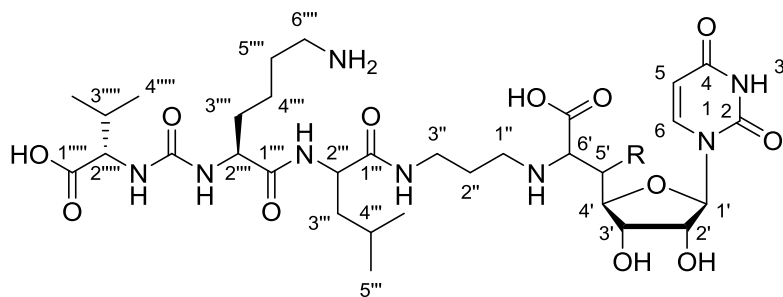

**Figure S20.** Numbering of atoms of muraymycin target structures for the assignment of NMR signals.

DCAS0606b.dbo  
Spork / bucho

Feb 25 2012

INSTRUMENT INOVA-600  
OBSERVE E1

Frequency 599.742 MHz  
Spectral width 10010.0 Hz  
Acquisition time 3.197 sec  
Relaxation delay 0.400 sec  
Pulse width 45.0 degrees  
Temperature 35.0 Deg. C / 305.1 K  
No. repetitions 16  
Double precision acquisition  
DATA PROCESSING  
F2 size 131072  
Total acquisition time 1 minutes

NC(CCC(=O)NCC(=O)N[C@@H]1C[C@H](O)[C@@H](O)[C@H]1O)C(=O)O

7.26 (6) d 8.10  
6.01 (5) d 3.46  
5.87 (4')  
4.56 (6') d 5.40 d 8.70 (2'')  
4.38 (3') d 6.70 d 6.48 (3'')  
4.24 (2') d 6.70 d 6.48 (3'')  
3.44 (4'') d 7.42 d 7.42 (6'')  
2.99 (5') d 6.90 d 6.90 (3'')  
2.44 (4'') d 6.90 d 6.90 (3'')  
2.28 (3'') d 6.90 d 6.90 (3'')  
1.57 (4'') d 6.90 d 6.90 (3'')  
1.05 (4'') d 6.90 d 6.90 (3'')  
1.05 (4'') d 6.90 d 6.90 (3'')

DATE: Feb 25 2012  
FILE: standard: bucho/dcas0606b.dbo

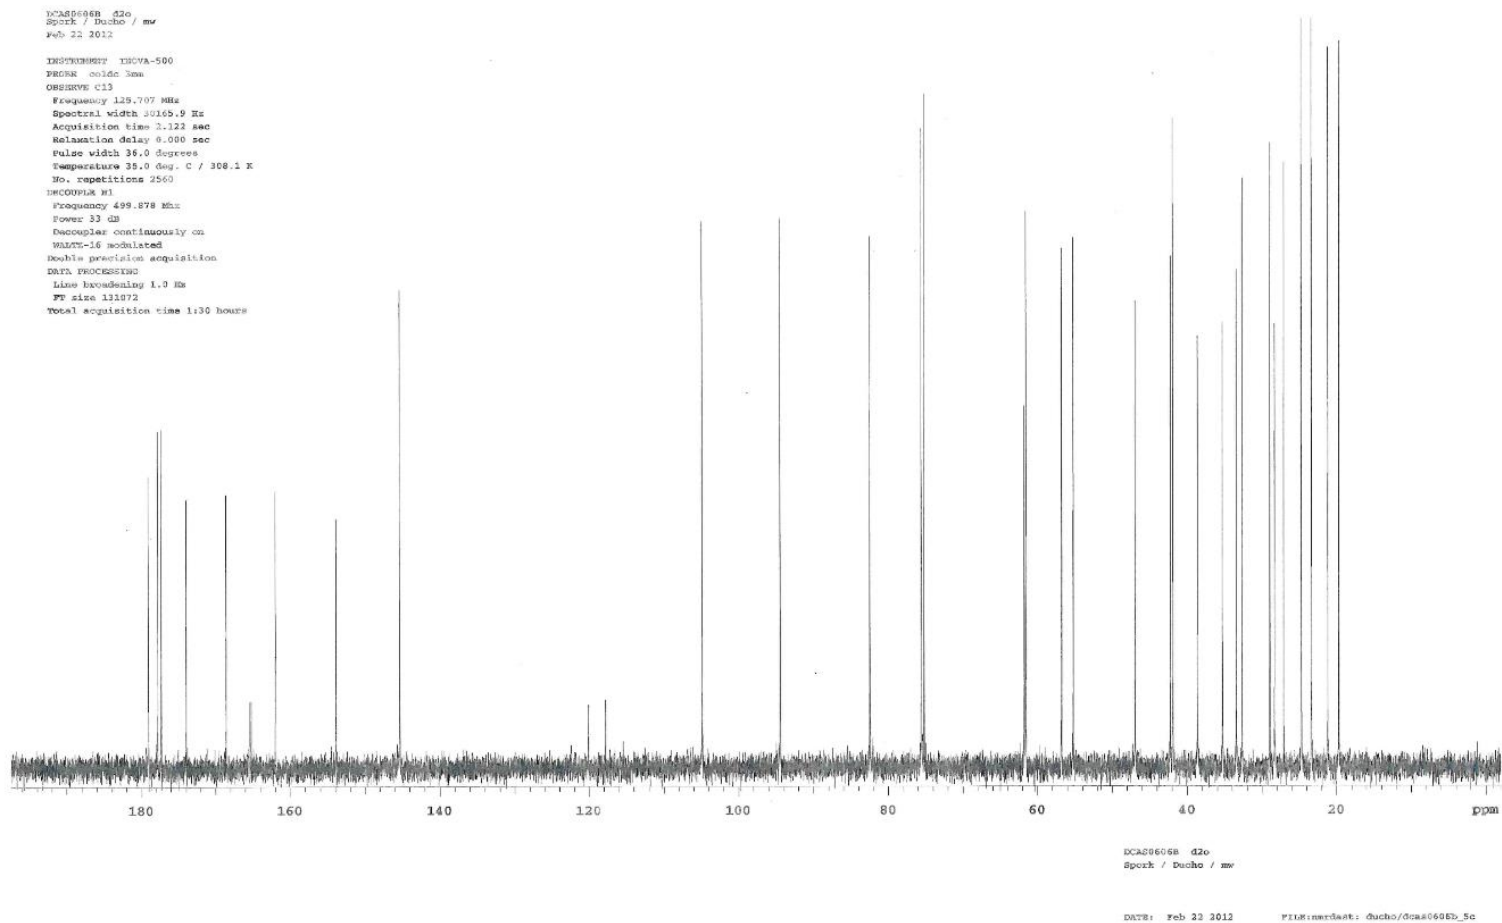

$^{13}\text{C}$  NMR spectrum of **10** (126 MHz,  $\text{D}_2\text{O}$ , 35 °C)



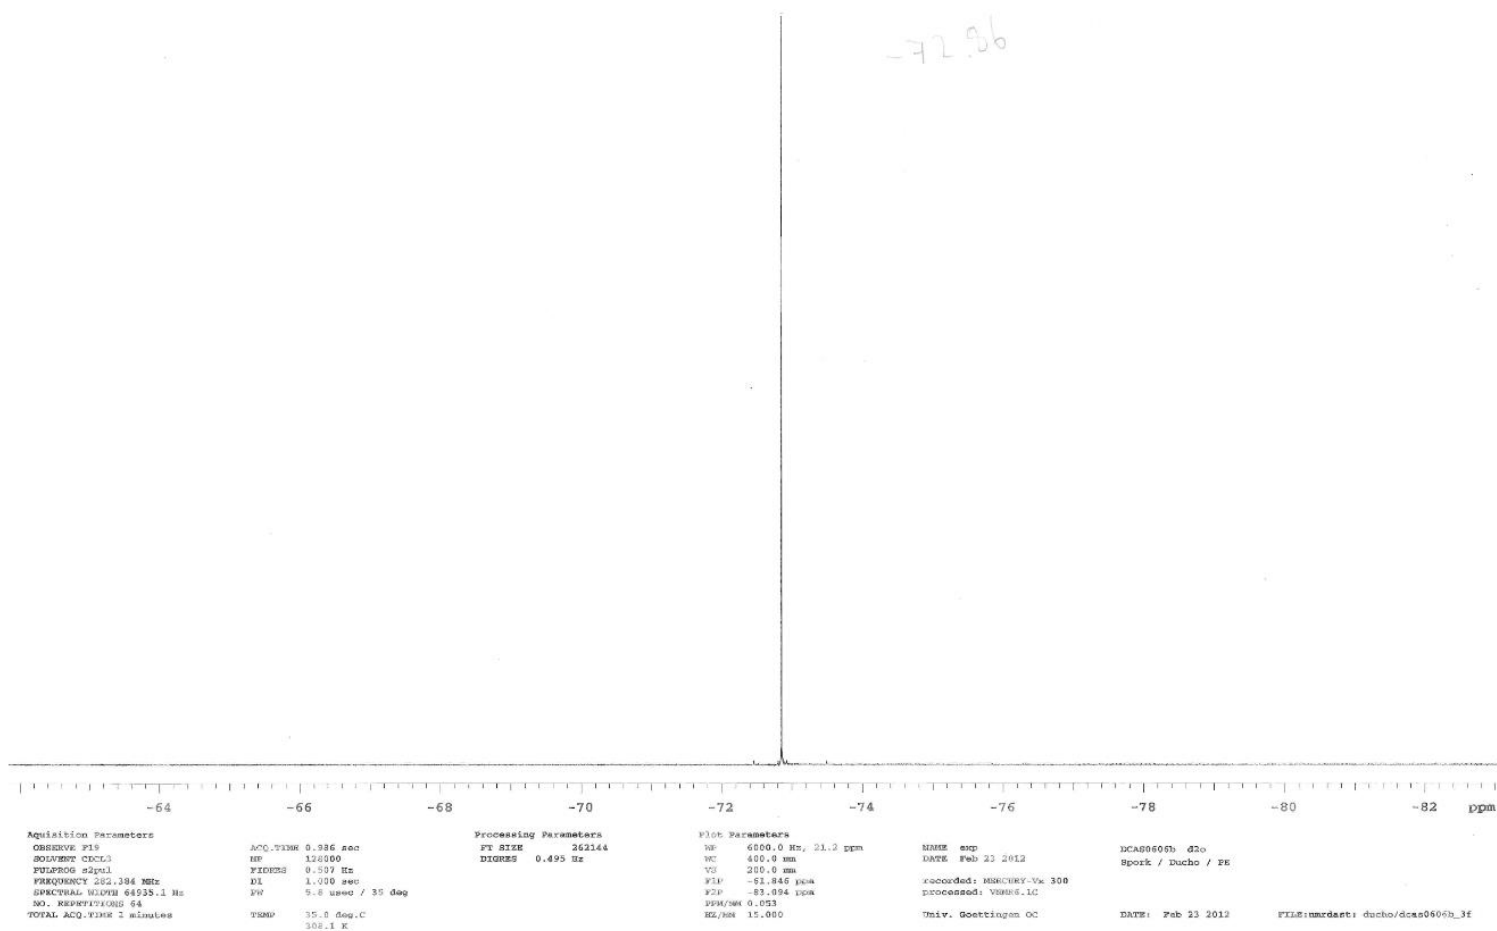

$^{19}\text{F}$  NMR spectrum of **10** (282 MHz,  $\text{D}_2\text{O}$ , 35 °C)

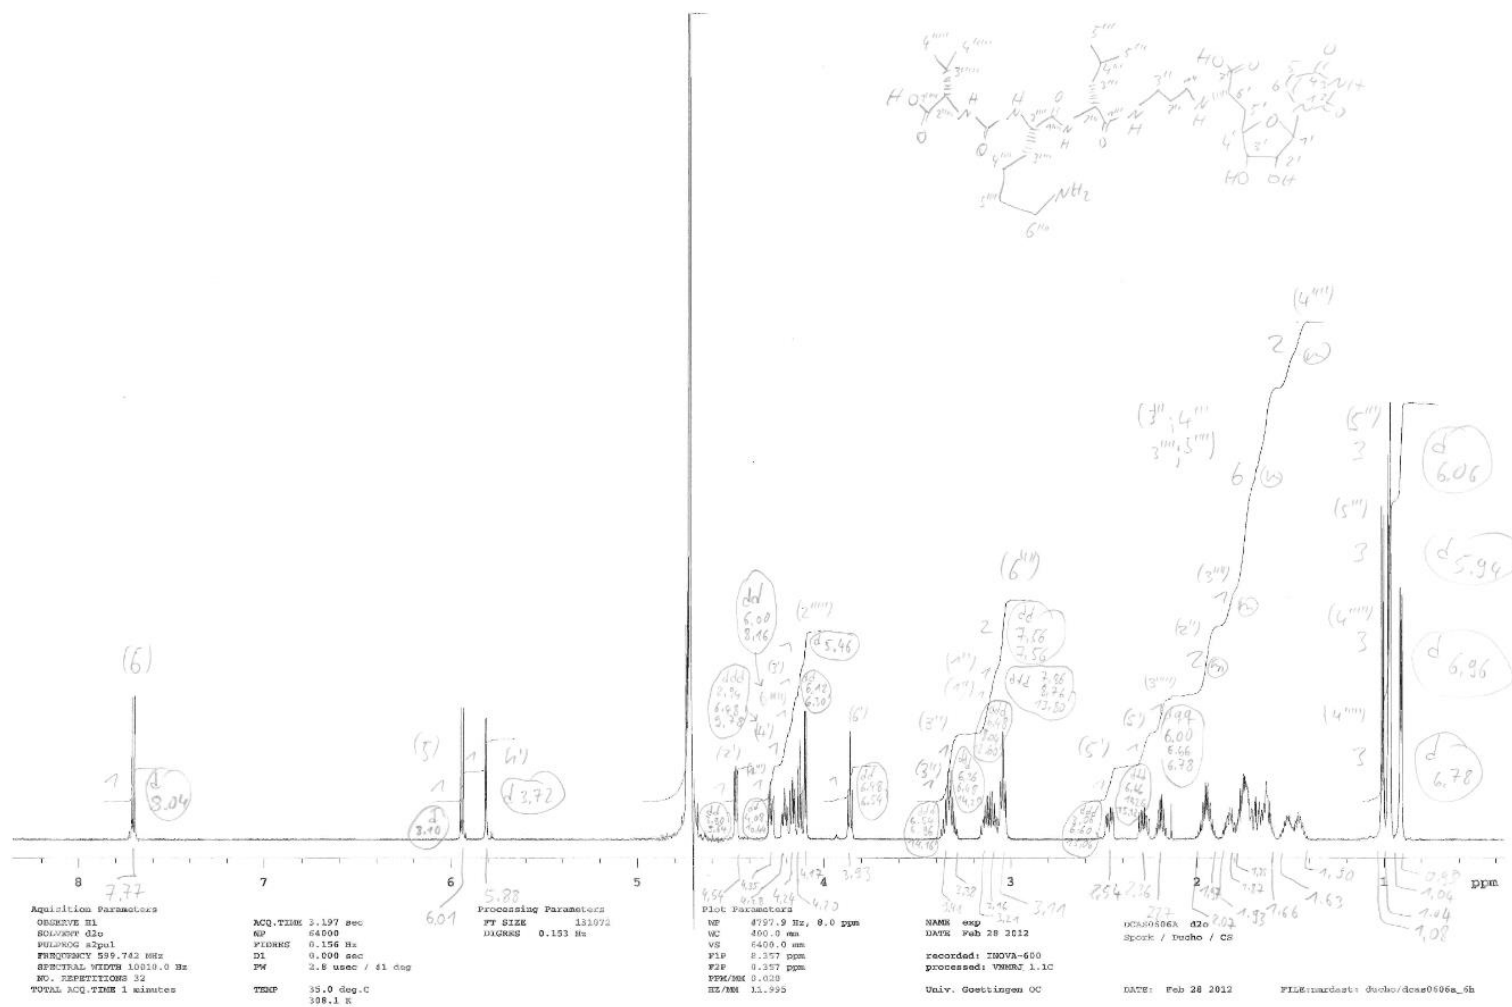

<sup>1</sup>H NMR spectrum of **11** (600 MHz, D<sub>2</sub>O, 35 °C)

DCAS0606A.d2o  
 Spark / Ducho  
 Feb 25 2012  
  
 INSTRUMENT INOVA-500  
 PROBE coldc 3mm  
 OBSERVE C13  
 Frequency 125.707 MHz  
 Spectral width 30165.9 Hz  
 Acquisition time 2.122 sec  
 Relaxation delay 0.000 sec  
 Pulse width 36.0 degrees  
 Temperature 35.0 deg. C / 308.1 K  
 No. repetitions 12800  
 DECOUPLE H1  
 Frequency 499.878 MHz  
 Power 35 dB  
 Decoupler continuously on  
 WALTZ-16 modulated  
 Double precision acquisition  
 DATA PROCESSING  
 Line broadening 1.0 Hz  
 FT size 262144  
 Total acquisition time 7:32 hours

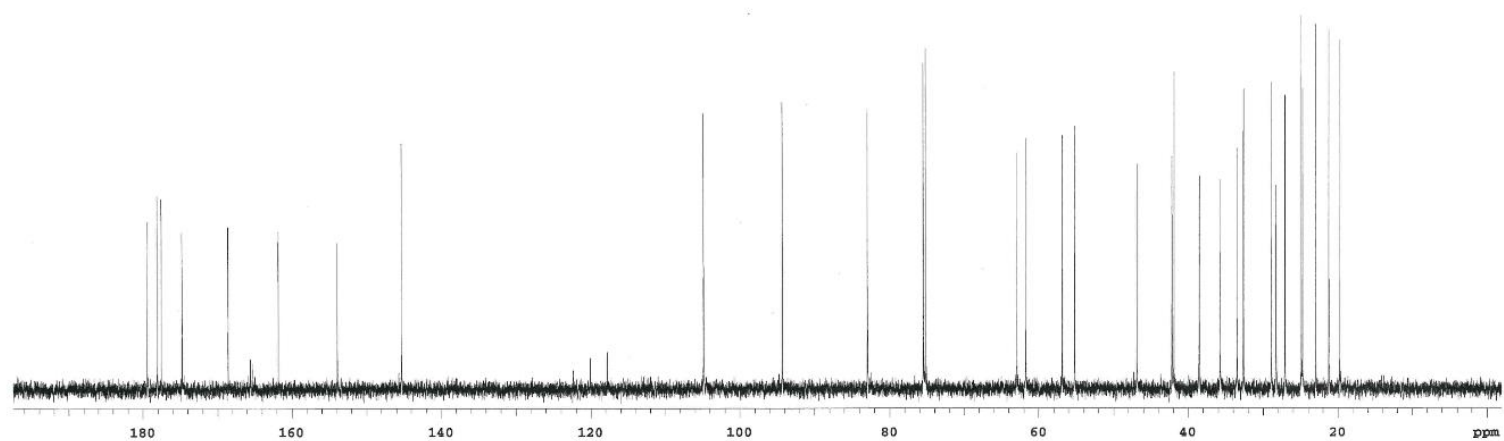

DCAS0606A.d2o  
 Spark / Ducho

DATE: Feb 25 2012      FILE:mrdata:ducho/dcas0606a\_5c

$^{13}\text{C}$  NMR spectrum of **11** (126 MHz,  $\text{D}_2\text{O}$ , 35 °C)

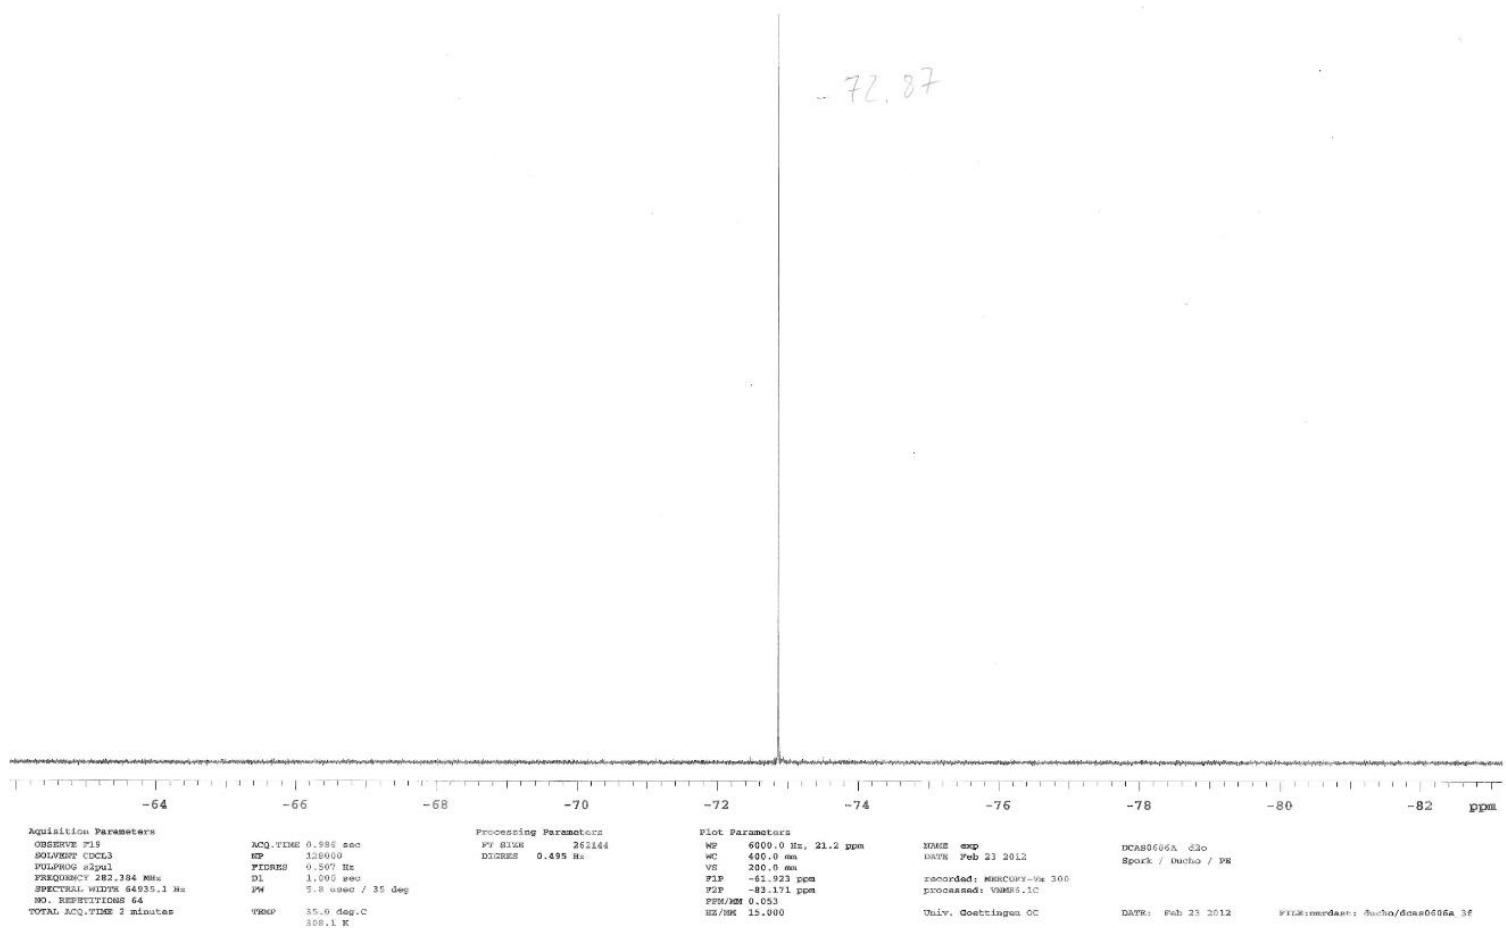

$^{19}\text{F}$  NMR spectrum of **11** (282 MHz,  $\text{D}_2\text{O}$ , 35 °C)

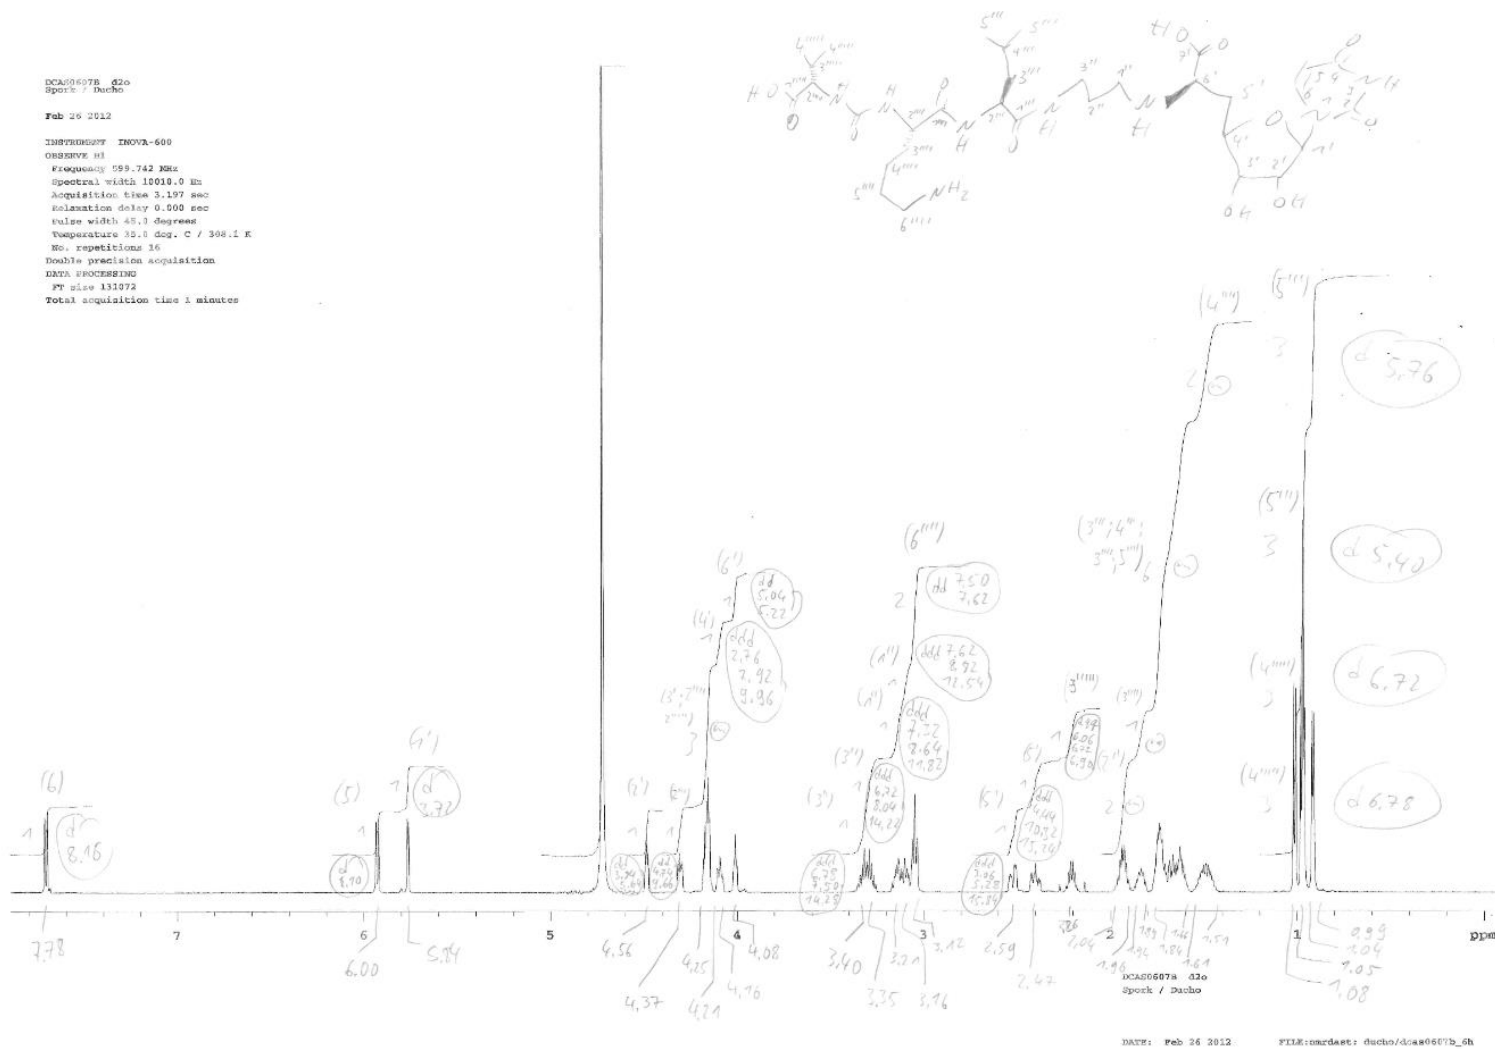

$^1\text{H}$  NMR spectrum of **12** (600 MHz,  $\text{D}_2\text{O}$ , 35 °C)

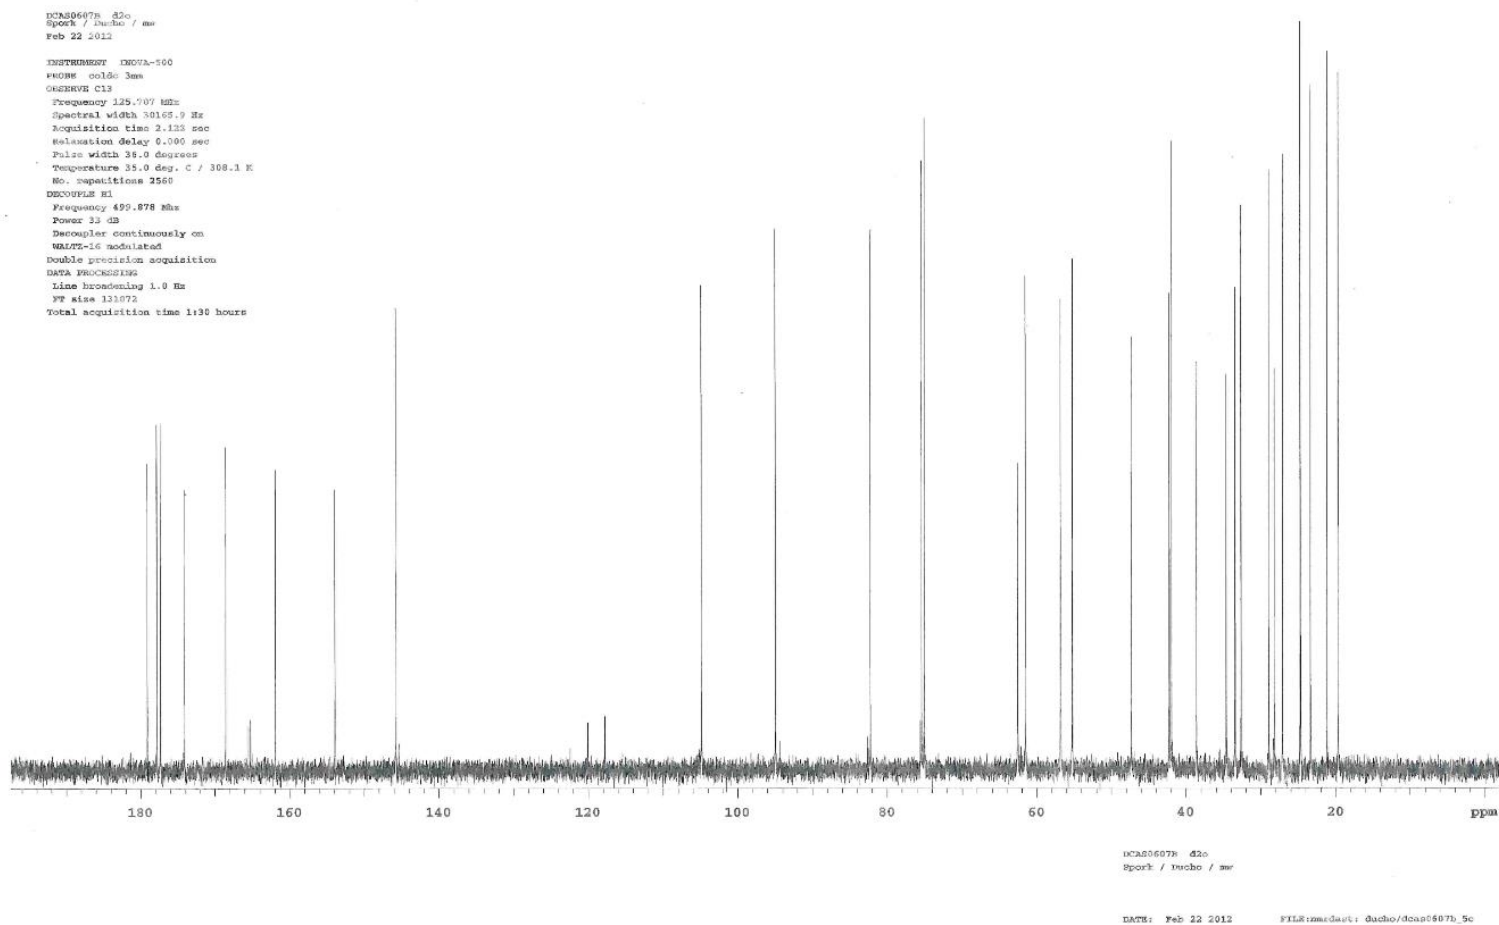

$^{13}\text{C}$  NMR spectrum of **12** (126 MHz,  $\text{D}_2\text{O}$ , 35  $^\circ\text{C}$ )

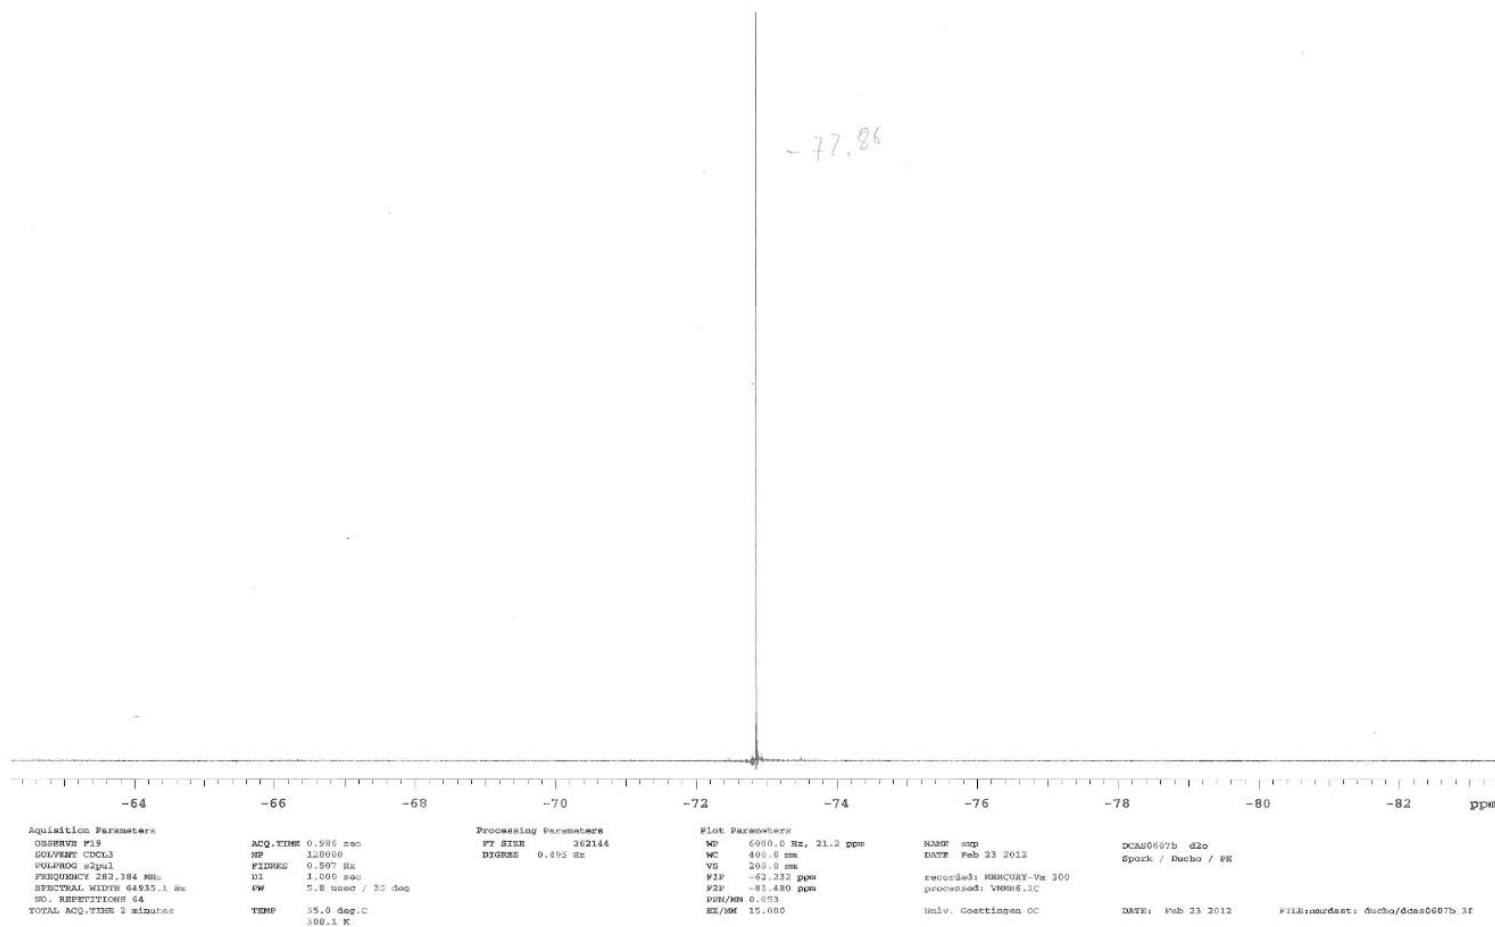

$^{19}\text{F}$  NMR spectrum of **12** (282 MHz,  $\text{D}_2\text{O}$ , 35 °C)

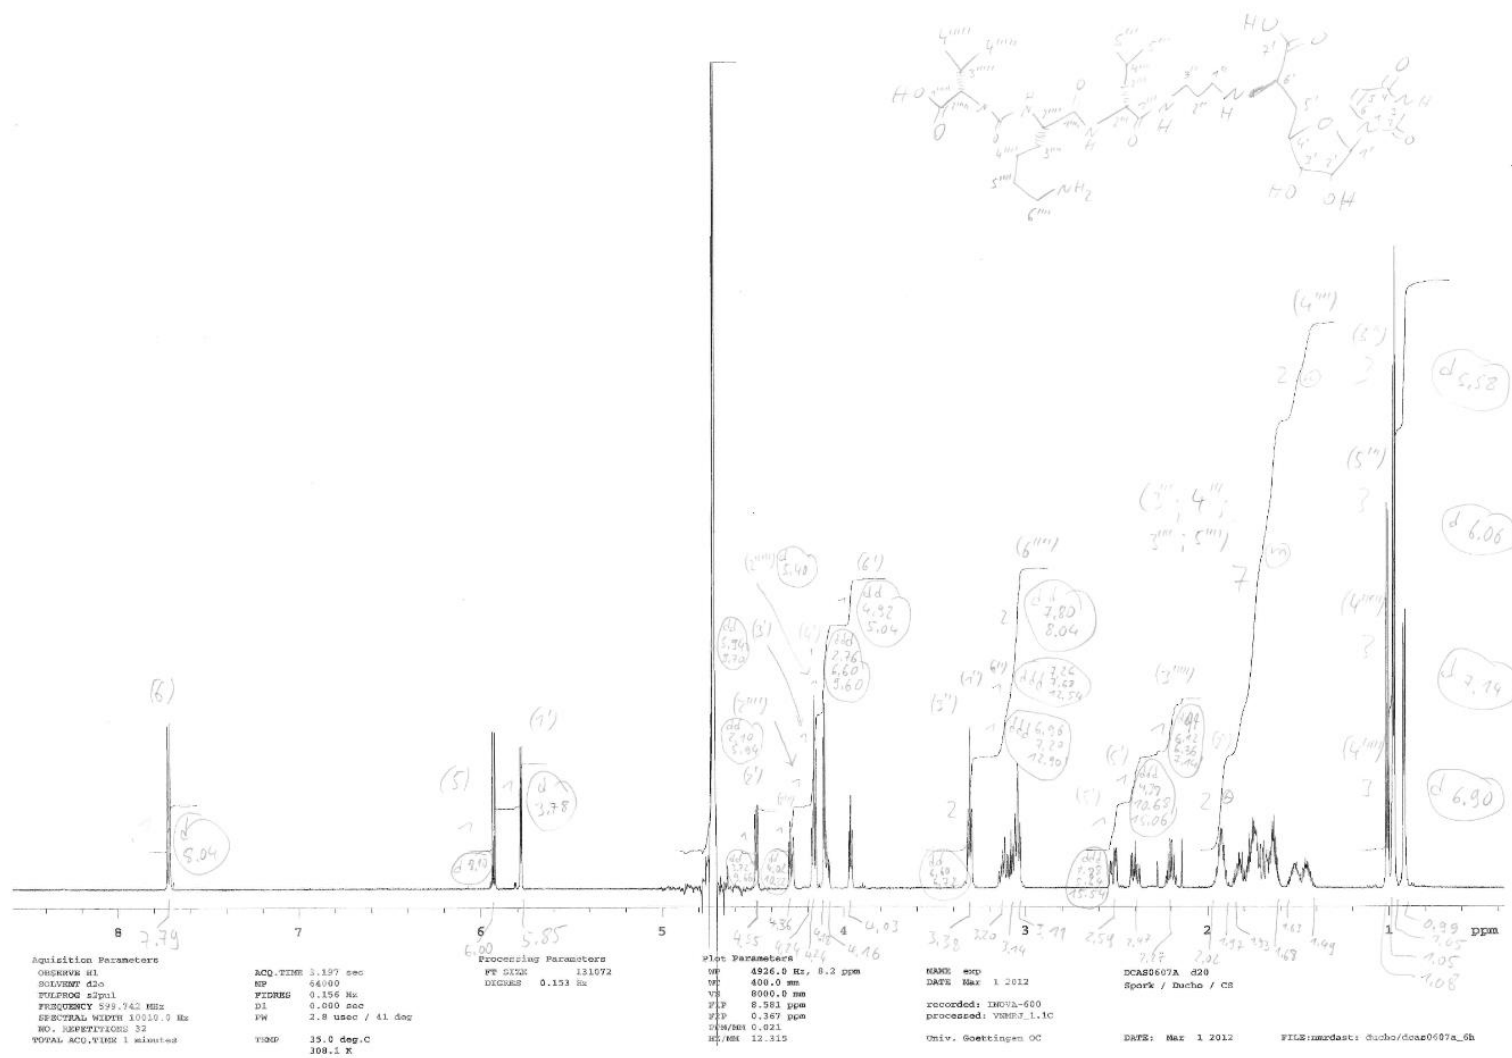



DCMS0607A 62o  
 Spork / Ducho  
 Feb 24 2012

INSTRUMENT INOVA-500  
 PROBE cp14o 3mm  
 OBSERVE C13  
 Frequency 125.707 MHz  
 Spectral width 20145.9 Hz  
 Acquisition time 2.122 sec  
 Relaxation delay 9.050 sec  
 Pulse width 36.0 degrees  
 Temperature 35.0 deg. C / 308.1 K  
 No. repetitions 12800

DECOUPLE H1  
 Frequency 499.878 MHz  
 Power 33 db  
 Decoupler continuously on  
 WALTZ-16 modulated  
 Double precision acquisition

DATA PROCESSING  
 Line broadening 1.0 Hz  
 FT size 131072  
 Total acquisition time 7:32 hours

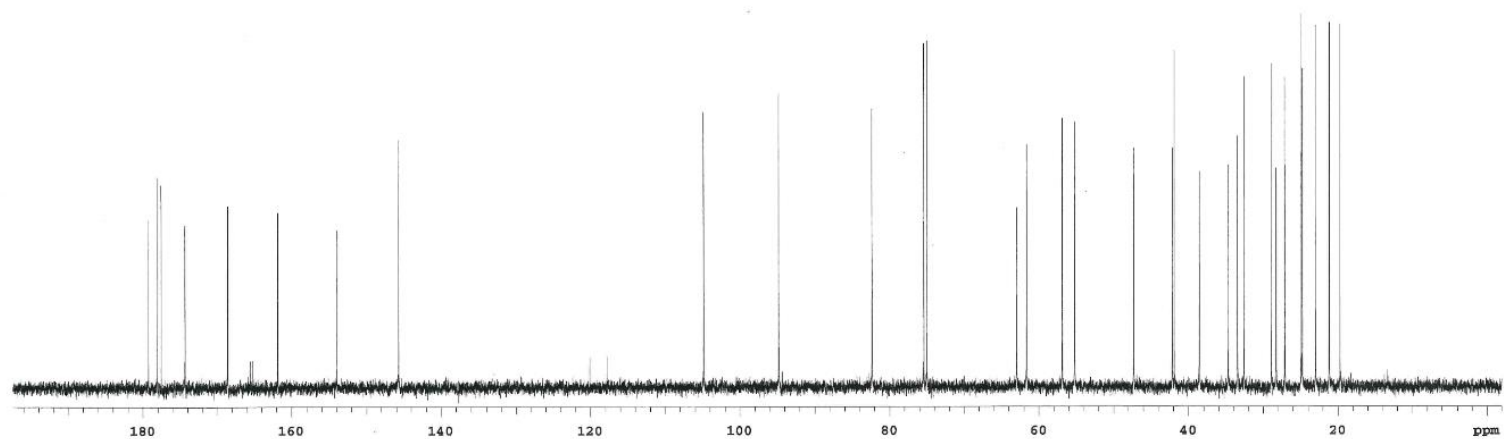

DCMS0607A 62o  
 Spork / Ducho

DATE: Feb 24 2012 FILE:mrdata:ducho/dcms0607a\_5c

$^{13}\text{C}$  NMR spectrum of **13** (126 MHz,  $\text{D}_2\text{O}$ , 35 °C)

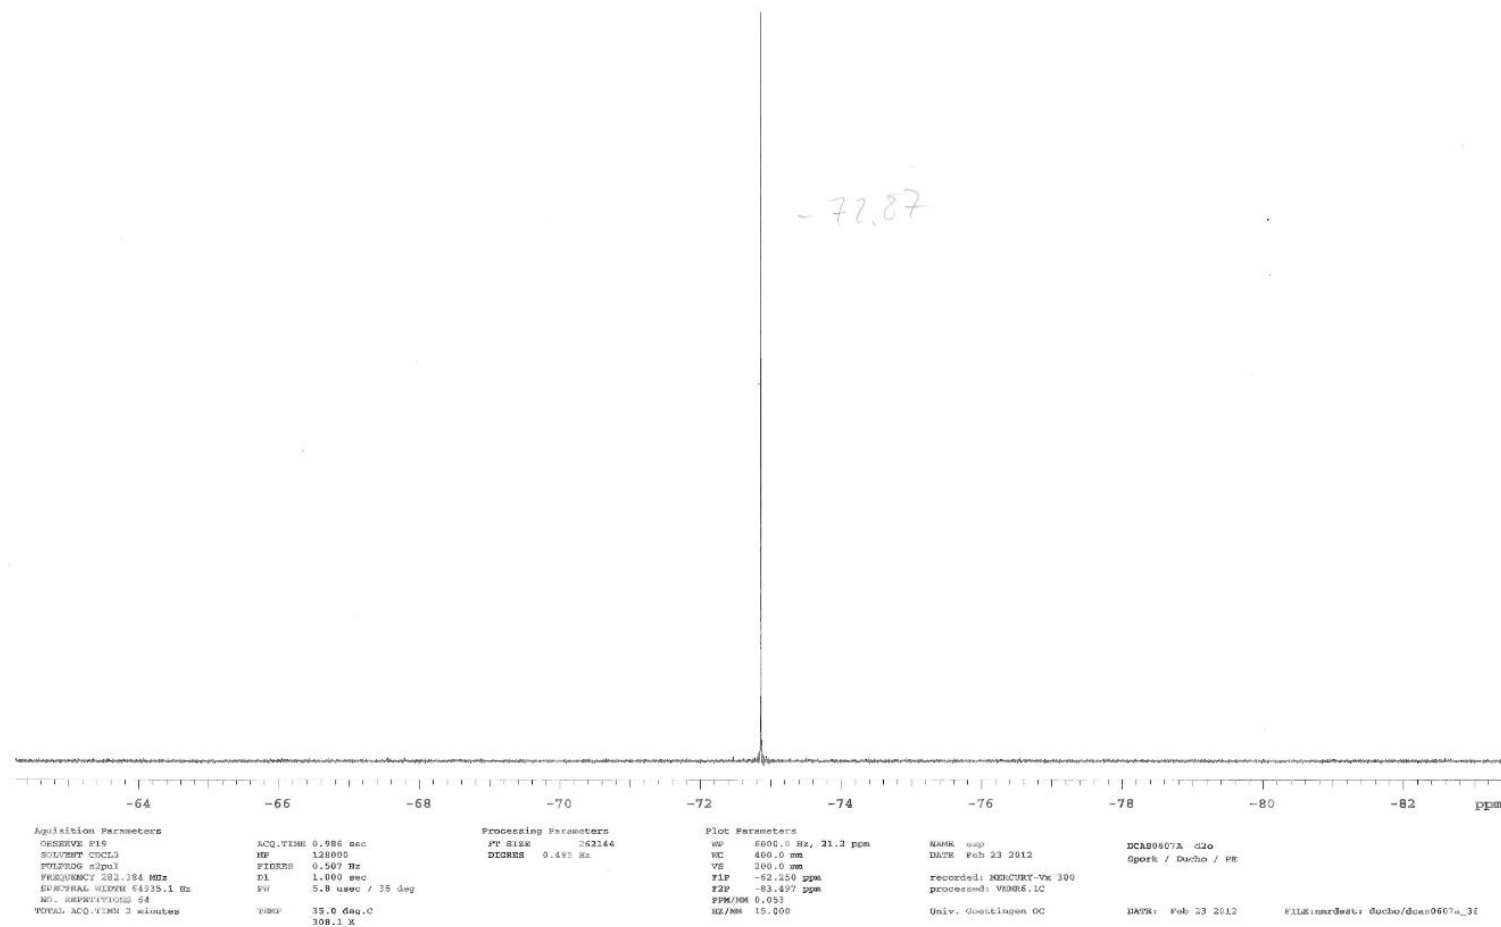

$^{19}\text{F}$  NMR spectrum of **13** (282 MHz,  $\text{D}_2\text{O}$ , 35 °C)

DJL8608B\_02o  
Spec# / Ducho / wv

Mar 3 2013

INSTRUMENT INOVA-600  
OBSERVE H<sub>1</sub>  
Frequency 599.742 MHz  
Spectral width 15010.0 Hz  
Acquisition time 3.197 sec  
Relaxation delay 0.000 sec  
Pulse width 65.5 degrees  
Temperature 35.0 deg. C / 308.1 K  
No. repetitions 32  
Double precision acquisition  
DATA PROCESSING  
F2 size 131072  
Total acquisition time 1 minutes

(G)

(H)

(I)

JCA00608B\_02o  
Spec# / Ducho / wv

PAGE: Mar 3 2013 FILE:\nardest\ducho\doss609db\_gh

S27

DCAS605B d2o  
 Spork / Ducho / mw  
 Feb 22 2012  
  
 INSTRUMENT INOVA-500  
 PROBE coldc 1mm  
 OBSERVE C13  
 Frequency 125.707 MHz  
 Spectral width 30145.9 Hz  
 Acquisition time 2.122 sec  
 Relaxation delay 0.800 sec  
 Pulse width 16.9 degrees  
 Temperature 35.0 deg. C / 308.1 K  
 No. repetitions 1288  
 DECOUPLE h1  
 Frequency 499.878 MHz  
 Power 35.00  
 Decouple continuously on  
 WALTZ-16 modulated  
 Double precision acquisition  
 DATA PROCESSING  
 Line broadening 1.0 Hz  
 FT size 327682  
 Total acquisition time 45 minutes

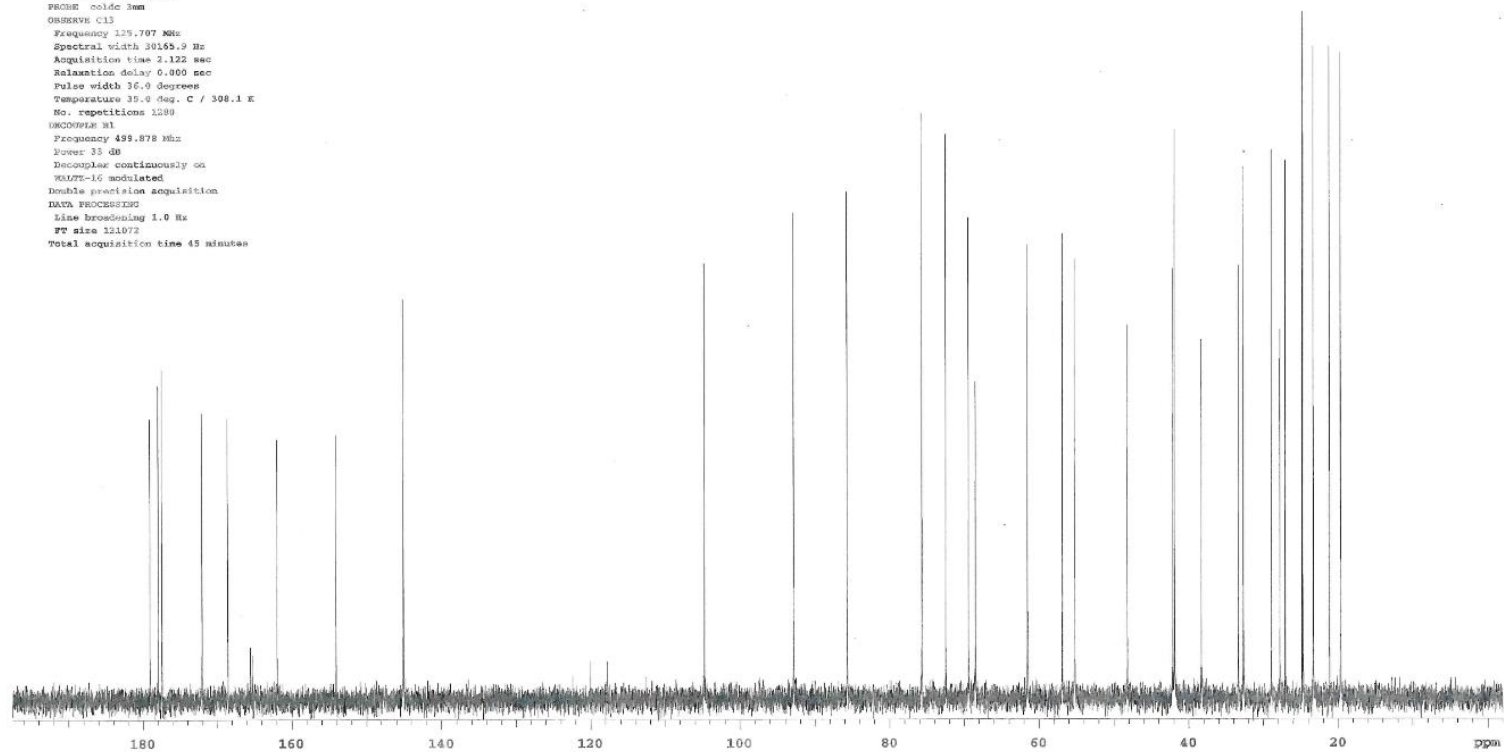

DCAS605B d2o  
 Spork / Ducho / mw

DATE: Feb 23 2013 FILE:merdest: ducho/dcas605Bb\_0c

$^{13}\text{C}$  NMR spectrum of **14** (126 MHz,  $\text{D}_2\text{O}$ , 35 °C)

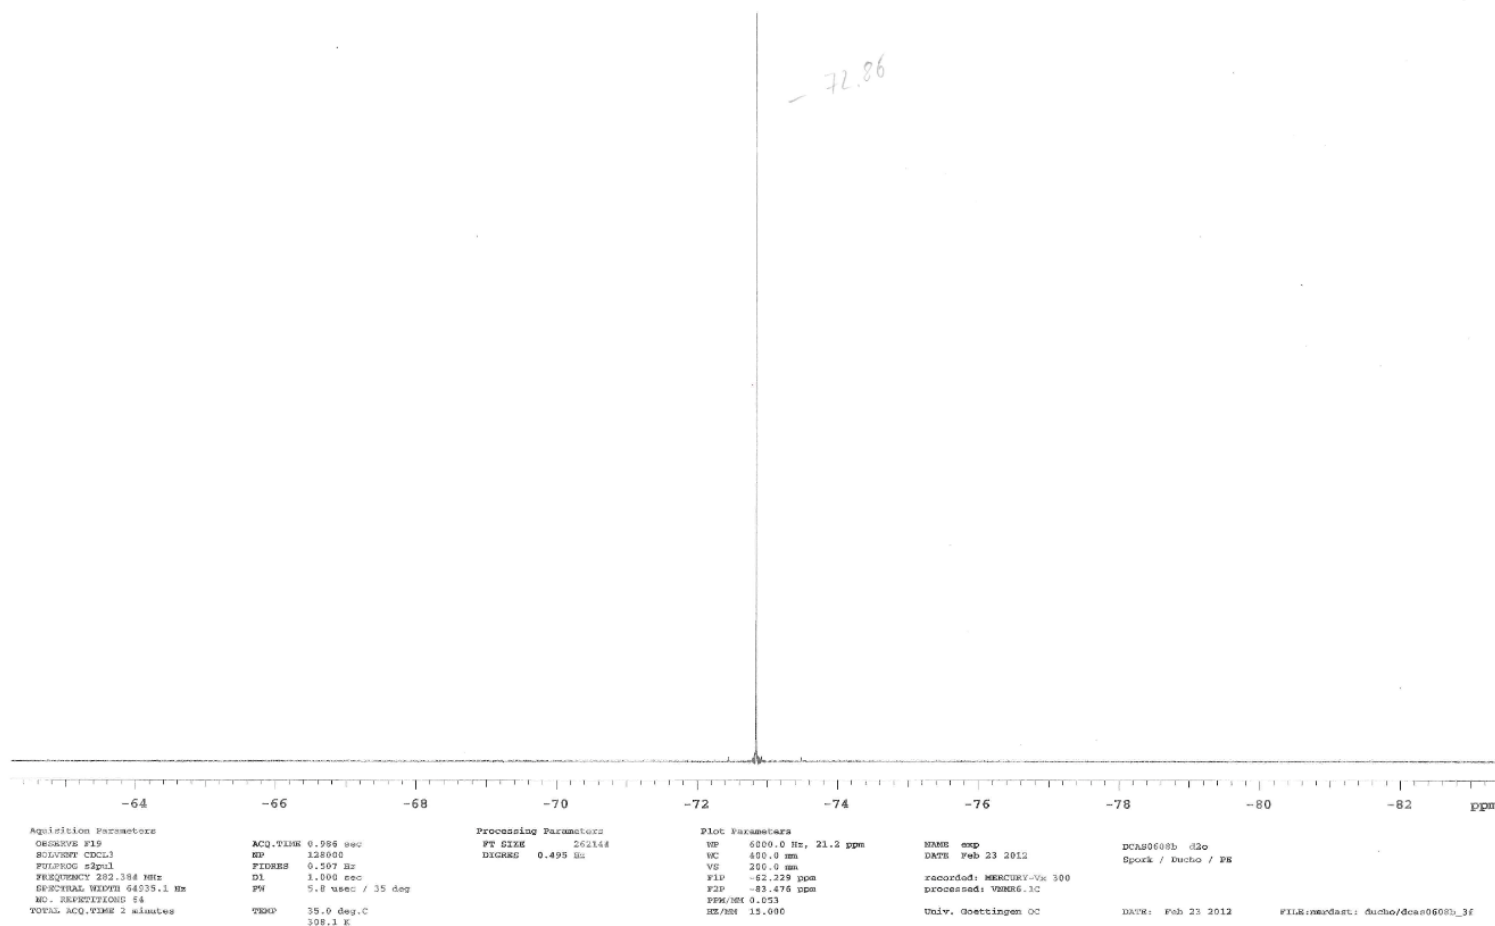

$^{19}\text{F}$  NMR spectrum of **14** (282 MHz,  $\text{D}_2\text{O}$ , 35 °C)

```

PCARS0068A d20
Spock6 / Buchto

Mar. 2 2012

INSTRUMENT 1MOWA-600
OBSERVER HL

Frequency 599.742 MHz
Spectral width 10010.0 Hz
Acquisition time 3.197 sec
Relaxation delay 0.000 sec
Pulse width 40.6 degrees
Temperature 35.0 deg. C / 598.1 K
No. repetitions 32
Double precision acquisition
DATA PROCESSING
FTZ size 131072
Total acquisition time 1 minute

```

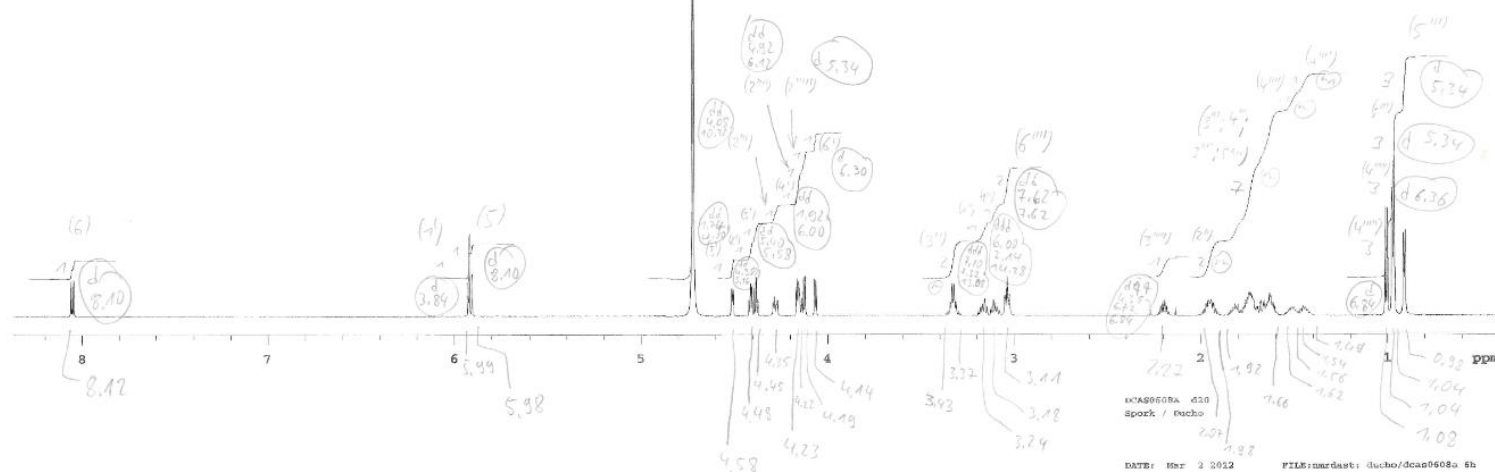<sup>1</sup>H NMR spectrum of **15** (600 MHz, D<sub>2</sub>O, 35 °C)

DCA00608A.d2o  
 Spork / Ducho  
 Feb 22 2012  
  
 INSTRUMENT INOVA-500  
 PROBE coldc 3mm  
 OBSERVE C13  
 Frequency 125.707 MHz  
 Spectral width 30165.9 Hz  
 Acquisition time 2.222 sec  
 Relaxation delay 9.090 sec  
 Pulse width 36.0 degrees  
 Temperature 35.0 deg. C / 308.1 K  
 No. repetitions 5120  
 DECOUPLE H1  
 Frequency 499.878 MHz  
 Power 33 dB  
 Decoupler continuously on  
 WALTZ-16 modulated  
 Double precision acquisition  
 DATA PROCESSING  
 Line broadening 1.0 Hz  
 FT size 131072  
 Total acquisition time 3:01 hours

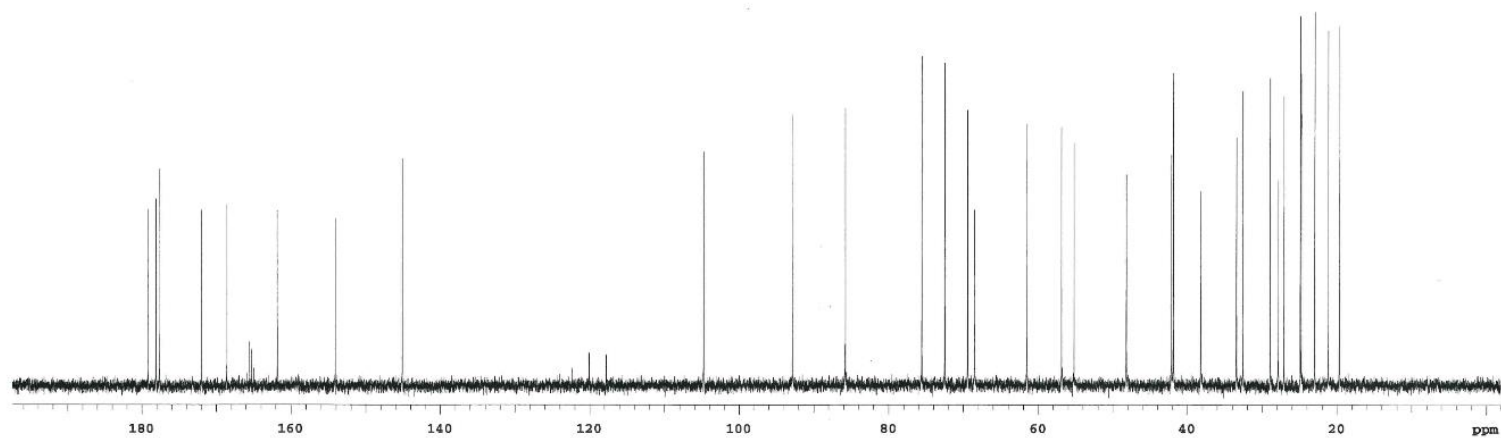

DCA00608A.d2o  
 Spork / Ducho

DATE: Feb 22 2012      FILE:mardest: ducho/dca00608a\_5c

$^{13}\text{C}$  NMR spectrum of **15** (126 MHz,  $\text{D}_2\text{O}$ , 35 °C)

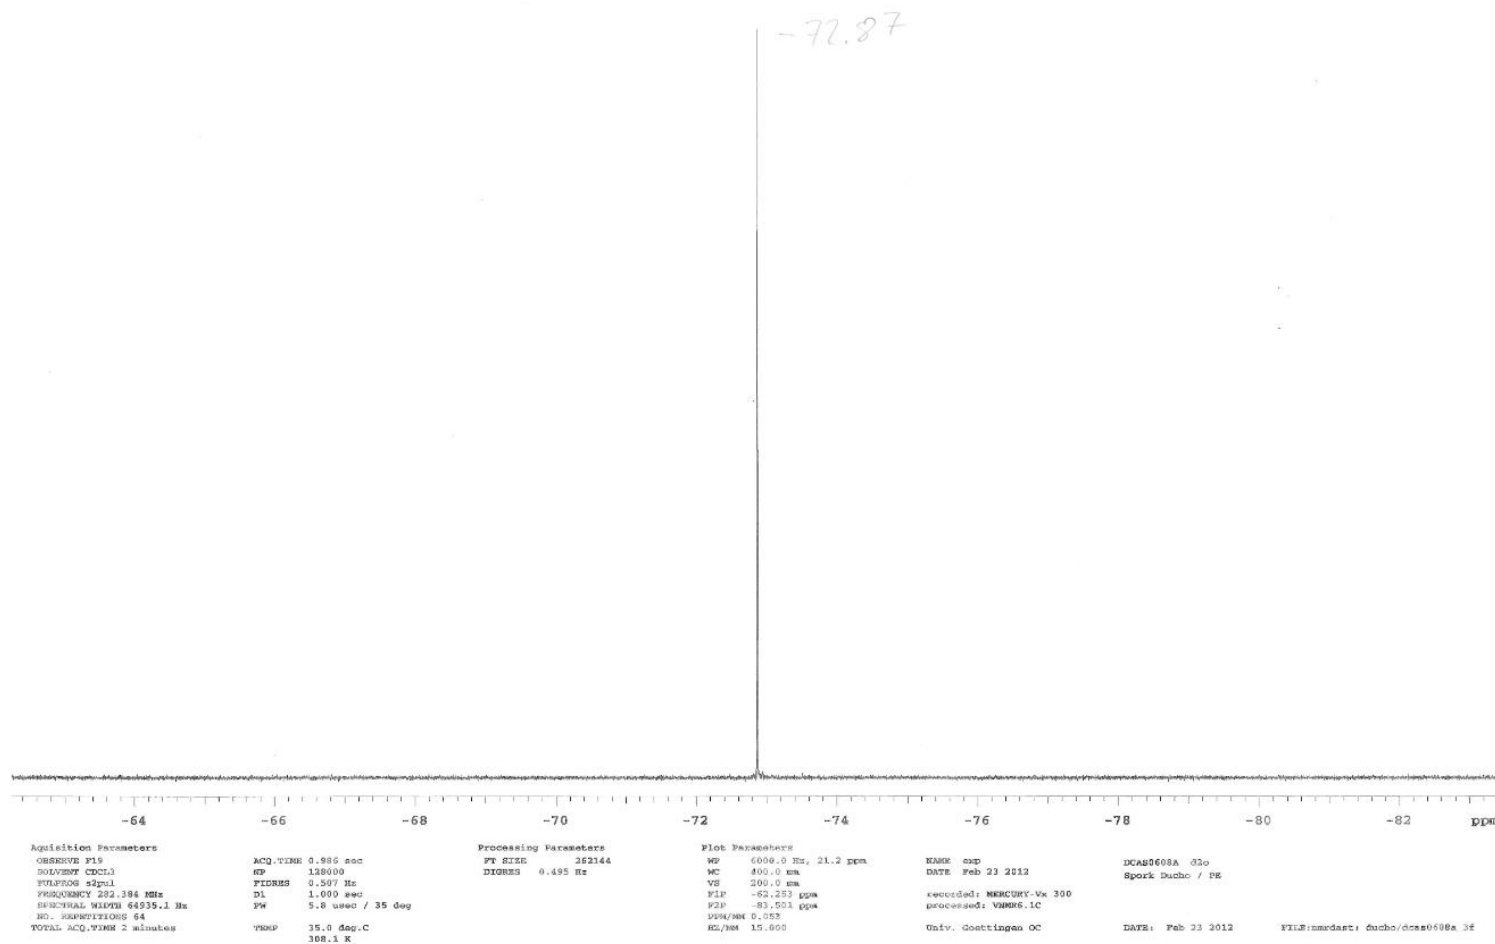

$^{19}\text{F}$  NMR spectrum of **15** (282 MHz,  $\text{D}_2\text{O}$ , 35 °C)



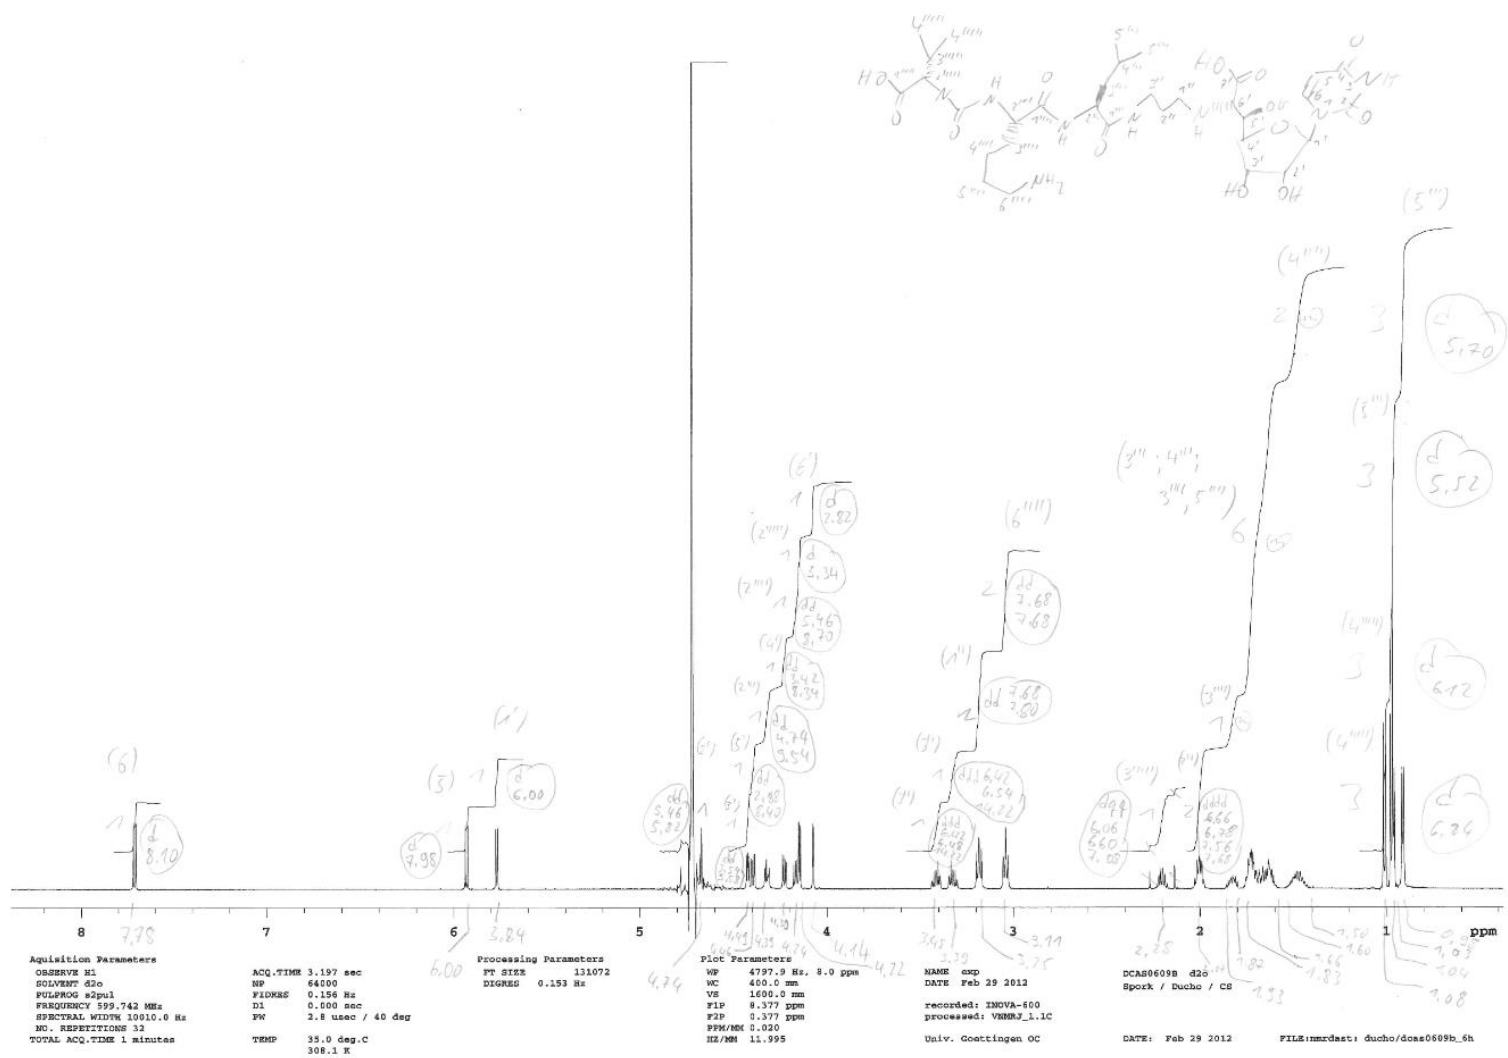

<sup>1</sup>H NMR spectrum of **16** (600 MHz, D<sub>2</sub>O, 35 °C)

DCM80609B d2o  
 Spork / Ducho  
 Feb 23 2012  
  
 INSTRUMENT INOVA-500  
 PROBE cp1dc 3mm  
 OBSERVE C13  
 Frequency 125.707 MHz  
 Spectral width 30165.9 Hz  
 Acquisition time 2.122 sec  
 Relaxation delay 0.000 sec  
 Pulse width 16.0 degrees  
 Temperature 35.0 deg. C / 308.1 K  
 No. repetitions 12800  
 DECOUPLE H1  
 Frequency 499.878 MHz  
 Power 33 dB  
 Decoupler continuously on  
 WALTZ-16 modulated  
 Double precision acquisition  
 DATA PROCESSING  
 Line broadening 1.0 Hz  
 FT size 131072  
 Total acquisition time 7:32 hours

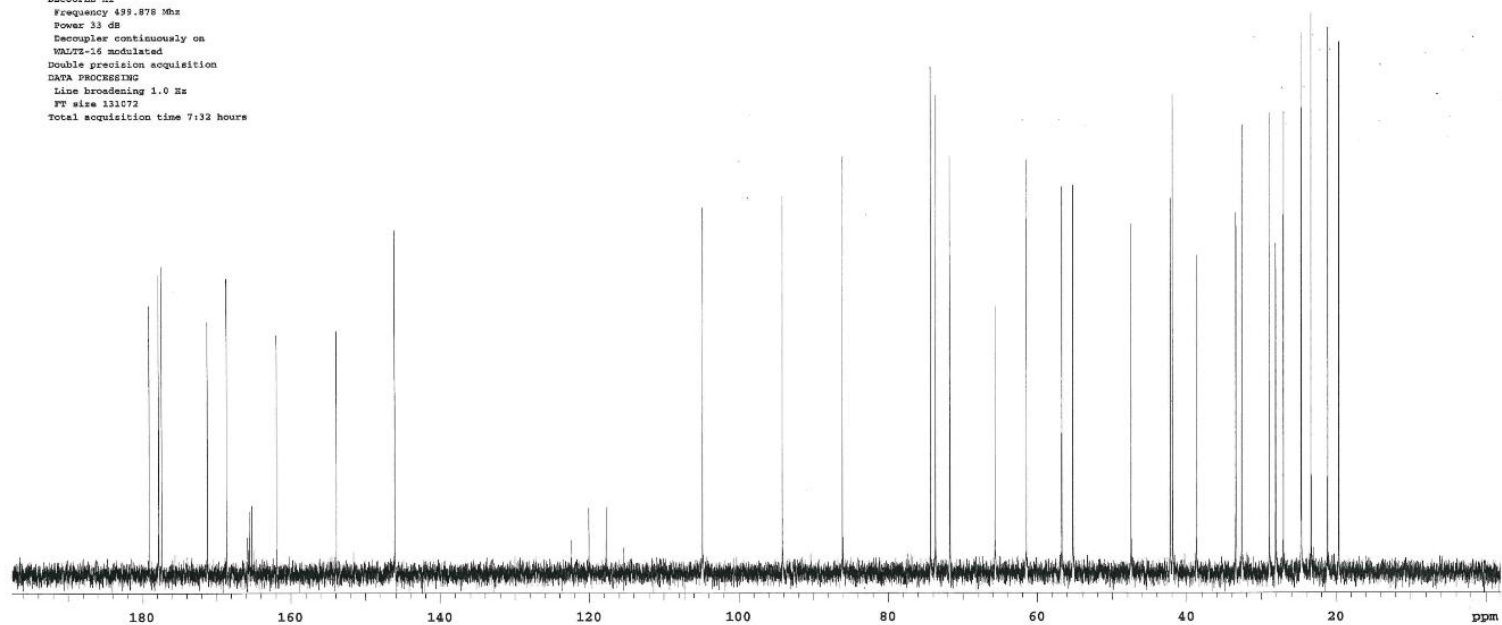

DCM80609B d2o  
 Spork / Ducho

DATE: Feb 23 2012      FILE:mrdata: ducho/dcm80609b\_5o

$^{13}\text{C}$  NMR spectrum of **16** (126 MHz,  $\text{D}_2\text{O}$ , 35 °C)

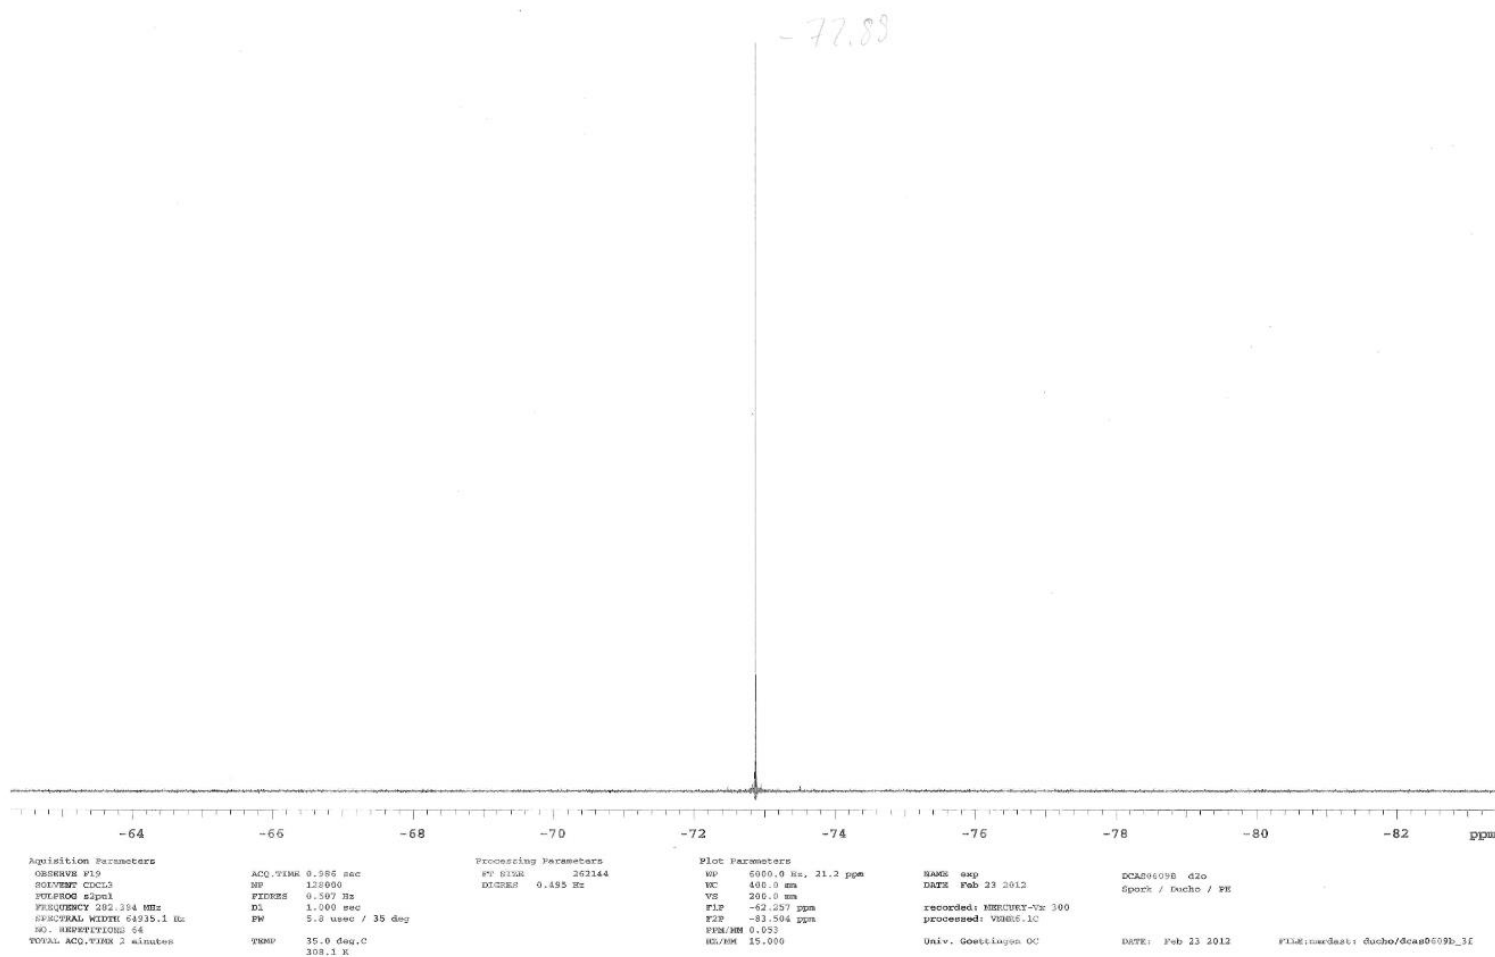

$^{19}\text{F}$  NMR spectrum of **16** (282 MHz,  $\text{D}_2\text{O}$ , 35 °C)

dca0609a.d2o 350radc  
 Spork/Ducho  
 Mar 5 2012  
 INSTRUMENT INOVA-600  
 OBSERVE IN  
 Frequency 599.742 MHz  
 Spectral width 10010.0 Hz  
 Acquisition time 3.197 sec  
 Relaxation delay 0.000 sec  
 Pulse width 30.7 degrees  
 Temperature 35.0 deg. C / 308.1 K  
 No. repetitions 64  
 Double precision acquisition  
 DATA PROCESSING  
 F2 size 131672  
 Total acquisition time 3 minutes

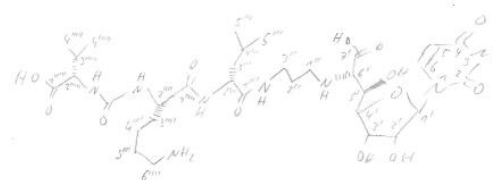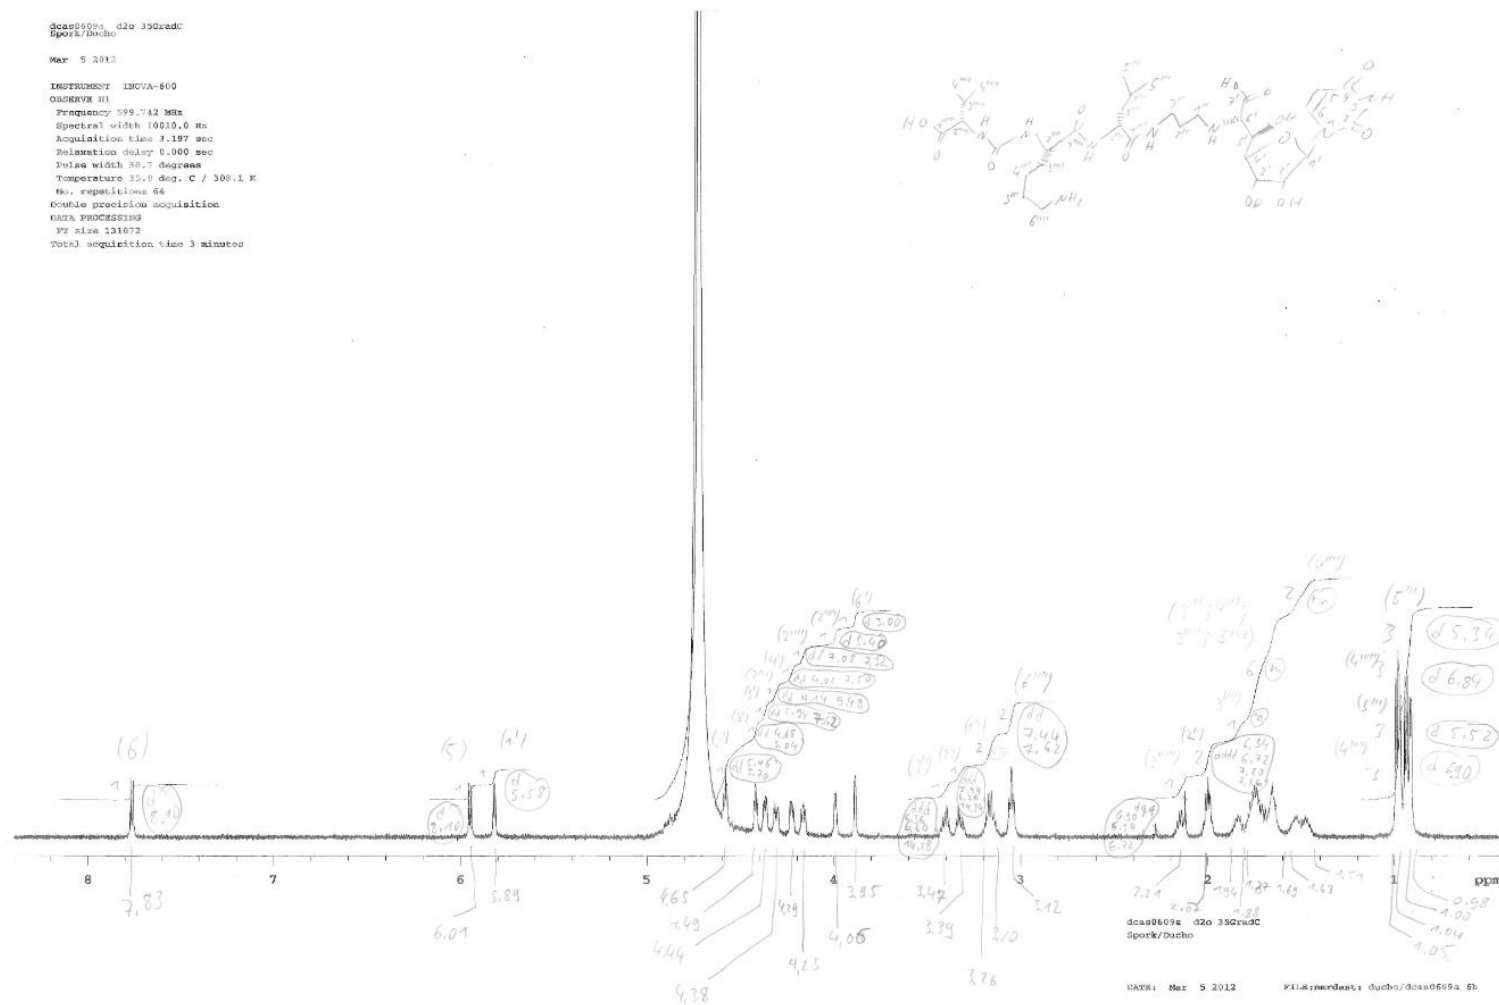

<sup>1</sup>H NMR spectrum of **17** (600 MHz, D<sub>2</sub>O, 35 °C)

DCA0509A.d2o  
 Spork / Ducho  
 Feb 26 2012  
  
 INSTRUMENT ECHOA-500  
 PROBE cp150 5mm  
 OBSERVE C13  
 Frequency 125.767 MHz  
 Spectral width 30165.5 Hz  
 Acquisition time 2.122 sec  
 Relaxation delay 0.000 sec  
 Pulse width 16.6 degrees  
 Temperature 35.0 deg. C / 298.1 K  
 No. repetitions 16000  
 DECOUPLE H1  
 Frequency 499.878 MHz  
 Power 25 dB  
 Decoupler continuously on  
 WALTZ-16 modulated  
 Double precision acquisition  
 DATA PROCESSING  
 Line broadening 1.0 Hz  
 FT size 262144  
 Total acquisition time 9:25 hours

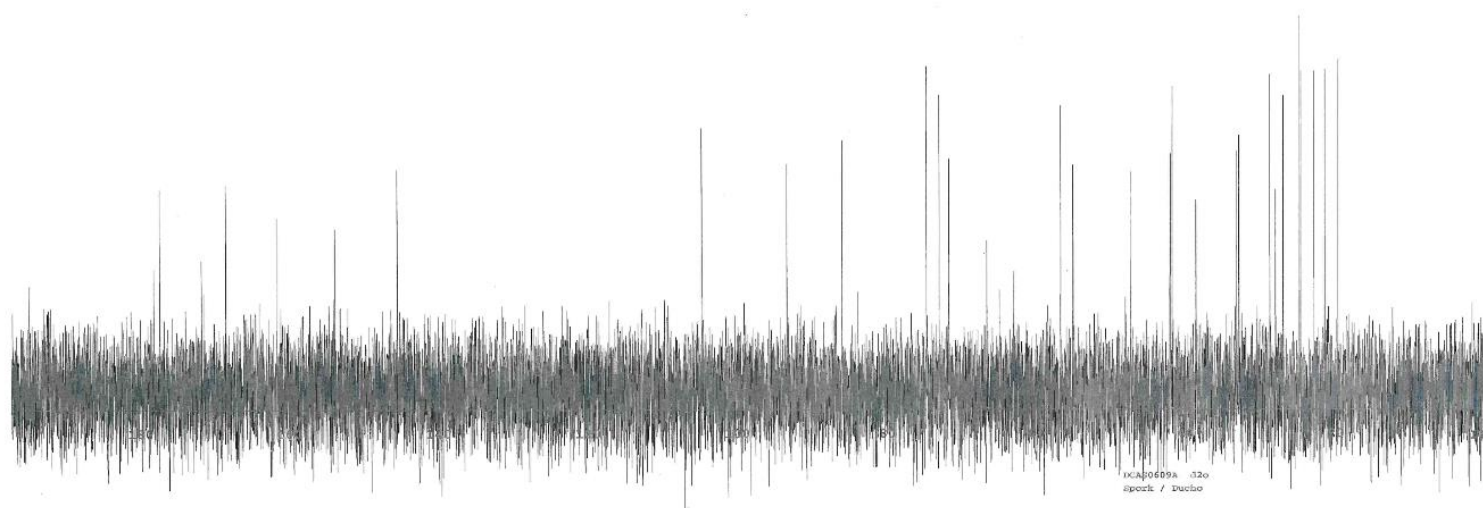

DCA0509A.d2o  
 Spork / Ducho

DATE: Feb 26 2012      FILENAME: ducho/dca0509a\_sc

$^{13}\text{C}$  NMR spectrum of **17** (126 MHz,  $\text{D}_2\text{O}$ , 35 °C)

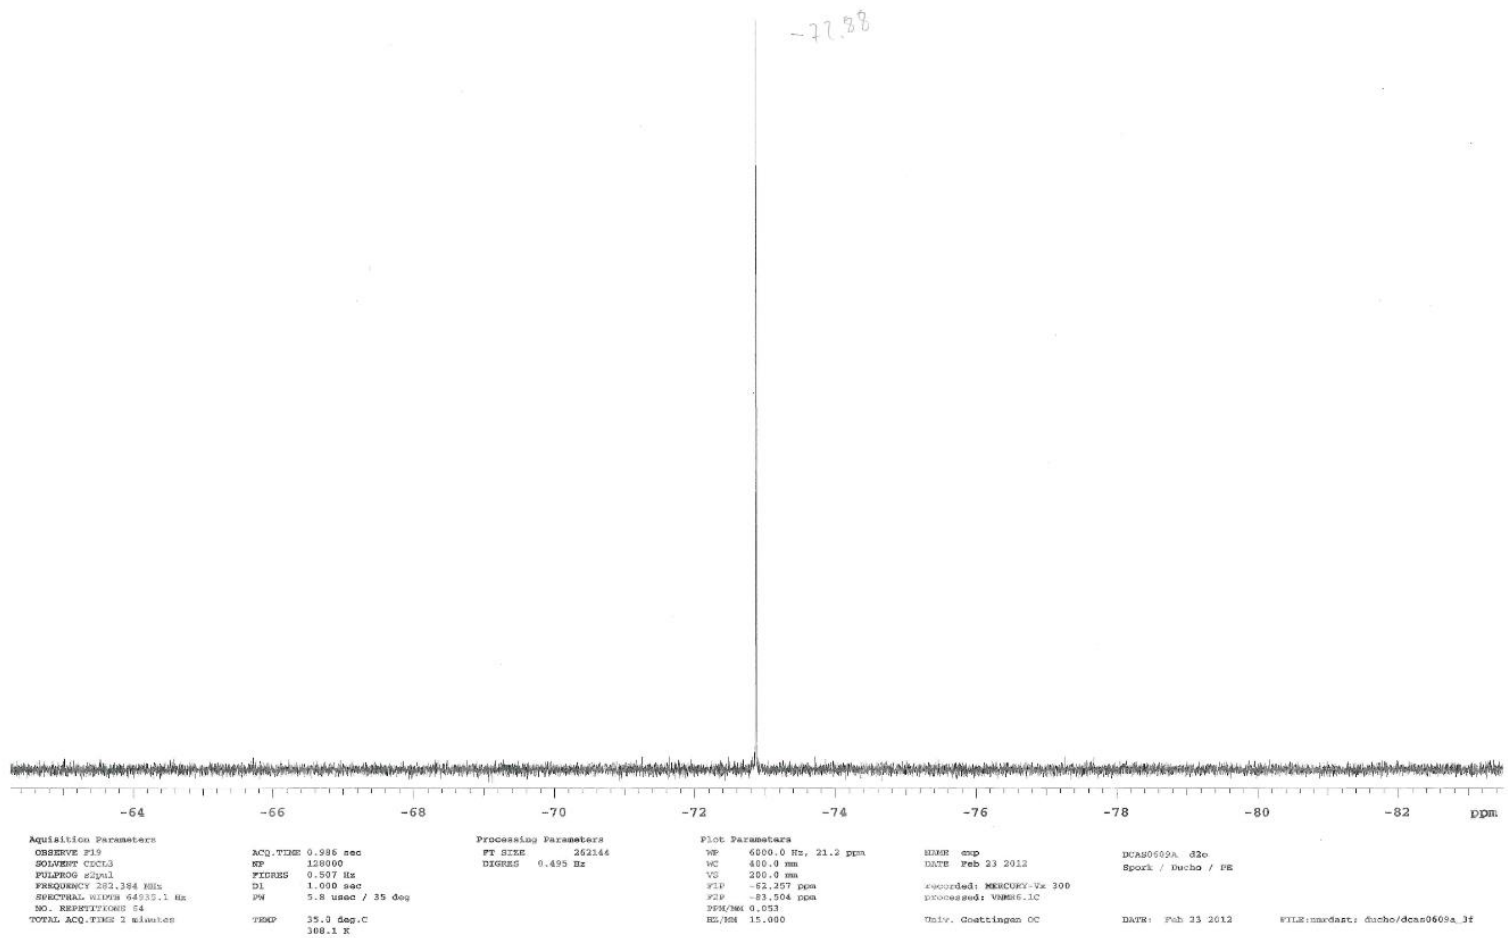

$^{19}\text{F}$  NMR spectrum of **17** (282 MHz,  $\text{D}_2\text{O}$ , 35 °C)

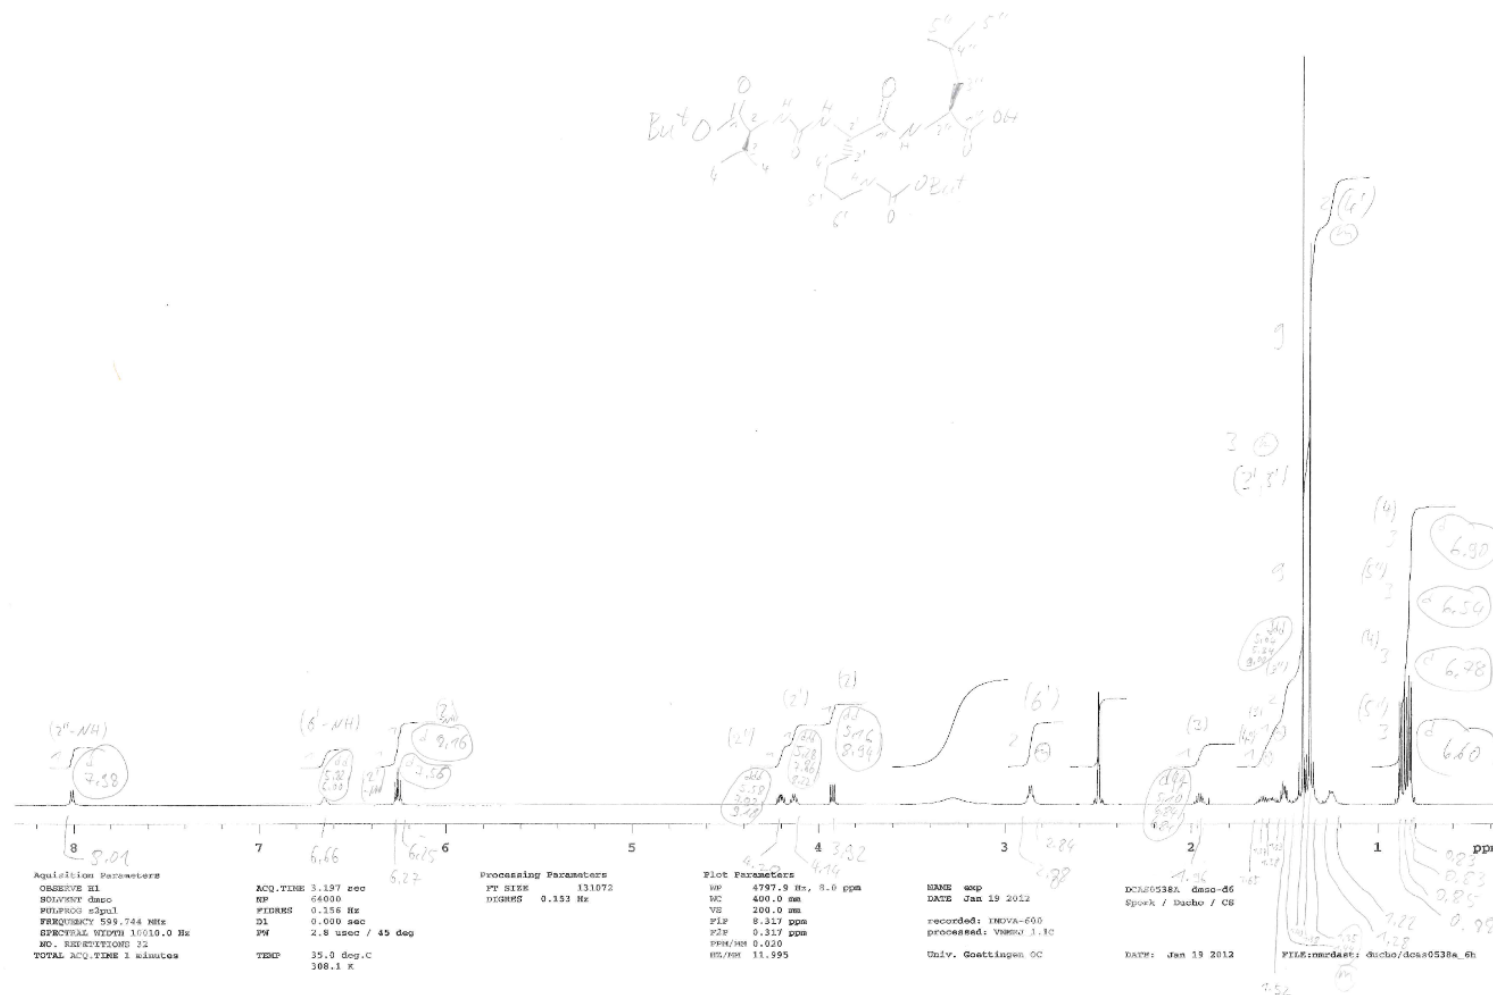

<sup>1</sup>H NMR spectrum of **18** (600 MHz, DMSO-d<sub>6</sub>, 35 °C)

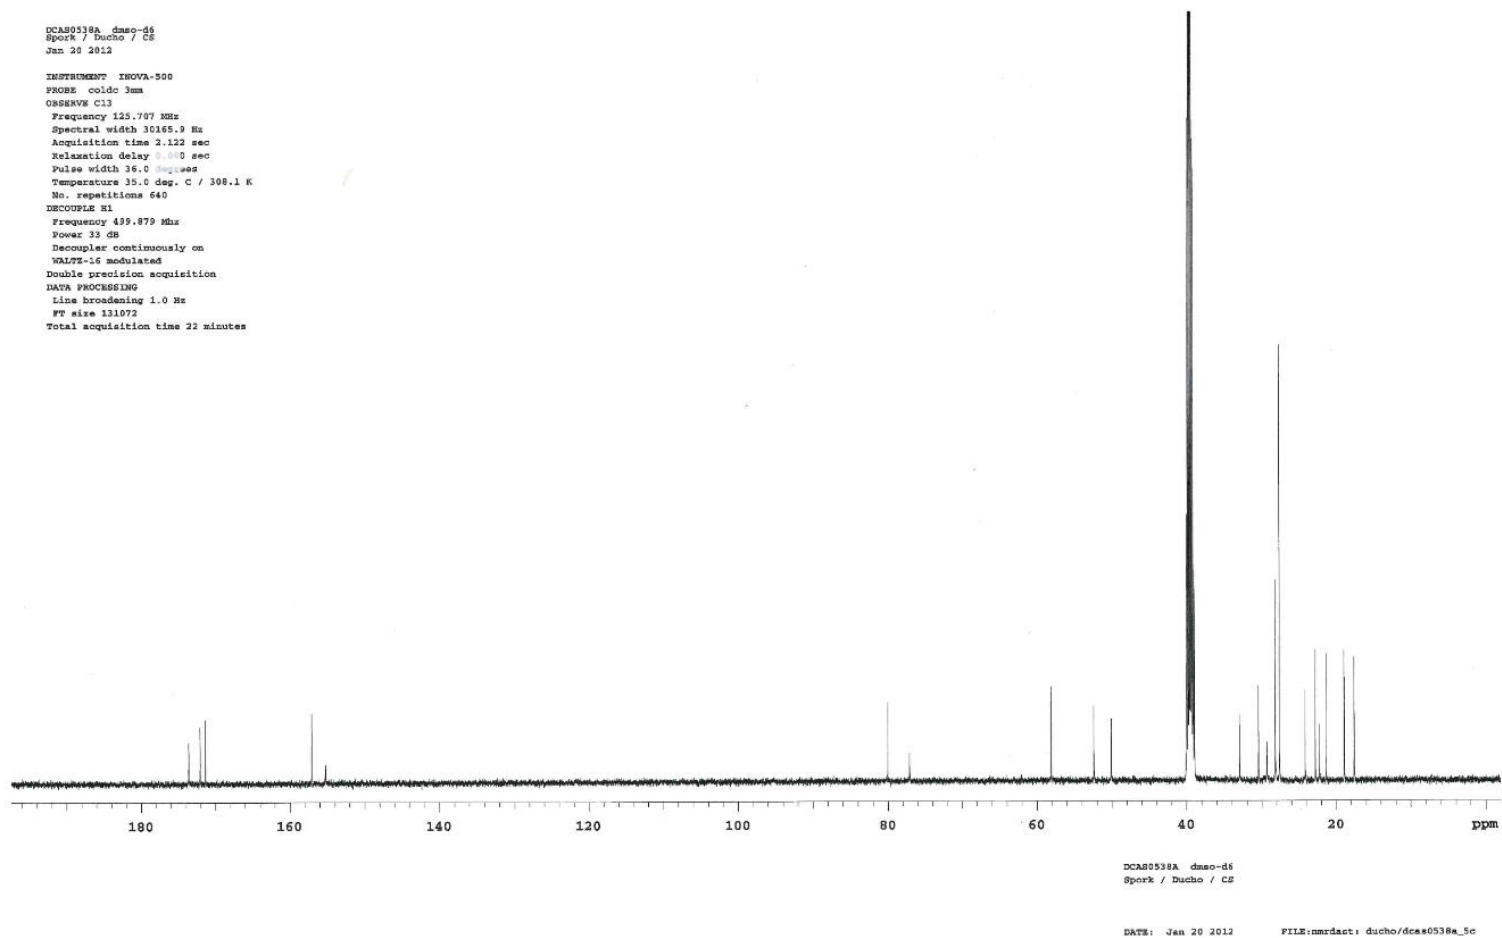

$^{13}\text{C}$  NMR spectrum of **18** (126 MHz, DMSO- $\text{d}_6$ , 35 °C)



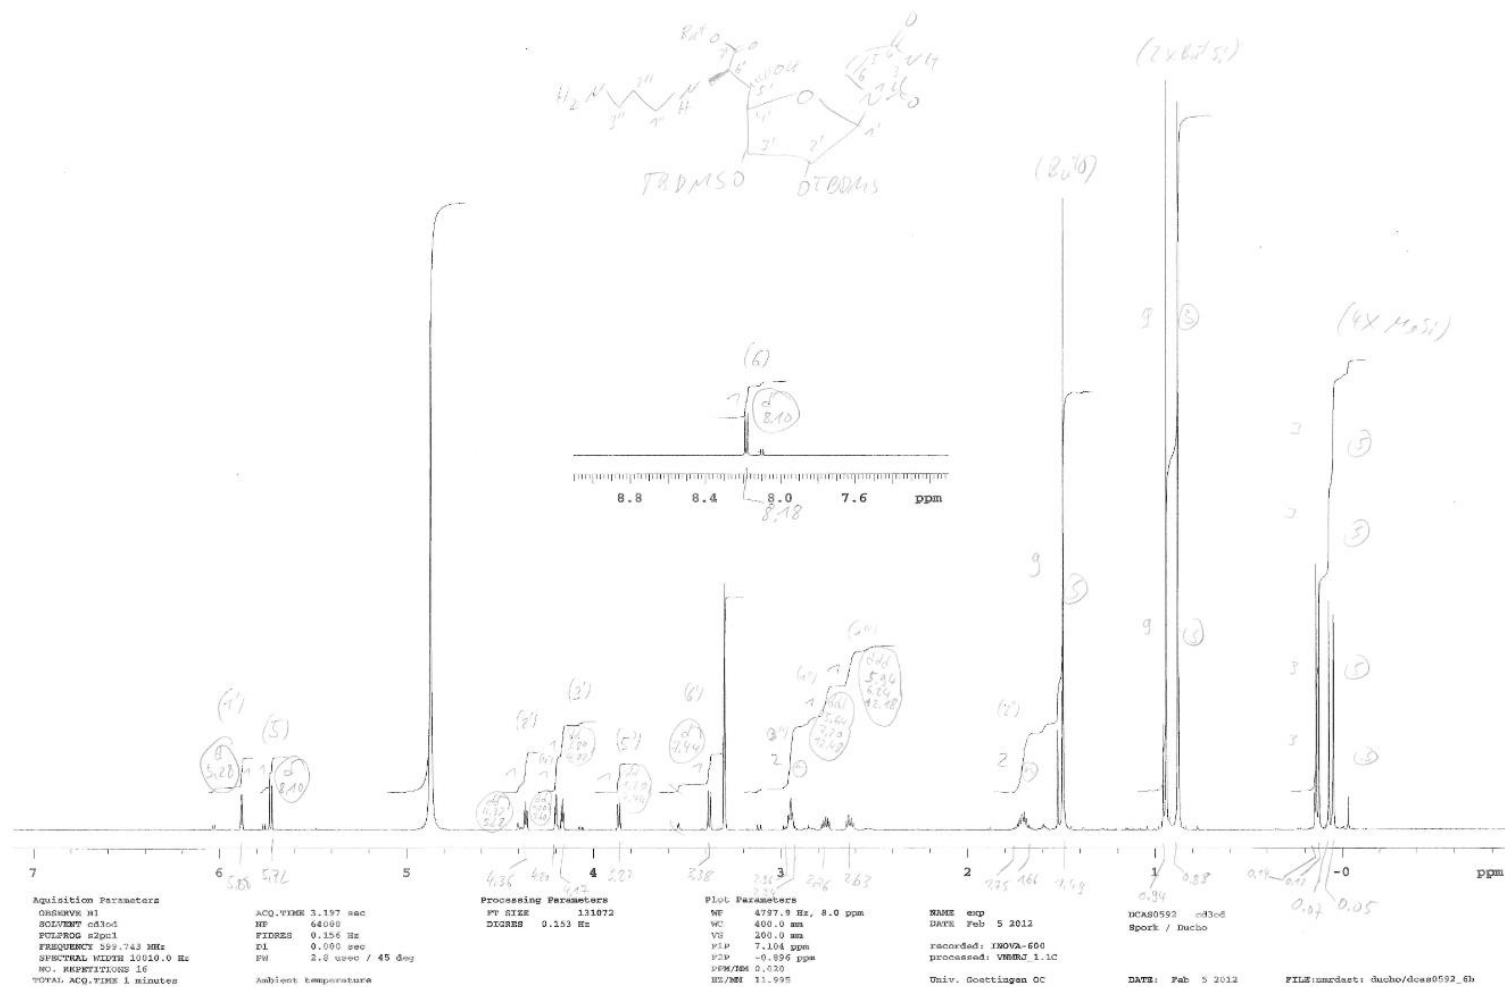

$^1\text{H}$  NMR spectrum of **21** (600 MHz,  $\text{CD}_3\text{OD}$ )

DCA0592 edited  
 Spork / Ducho  
 Feb 1 2012  
  
 INSTRUMENT INOVA-500  
 P100K 400.150 MHz  
 OBSERVE C13  
 Frequency 125.767 MHz  
 Spectral width 50165.9 Hz  
 Acquisition time 3.112 sec  
 Relaxation Delay 9.000 sec  
 Pulse width 36.0 degrees  
 Temperature 27.0 deg. C / 300.1 K  
 No. repetitions 640  
 DECOUPLE H1  
 Frequency 499.879 MHz  
 Power 33 dB  
 Decoupler continuously on  
 WALTZ-16 modulated  
 Double precision acquisition  
 DATA PROCESSING  
 F2 file processing 1.0 Hz  
 F2 size 131072  
 Total acquisition time 22 minutes

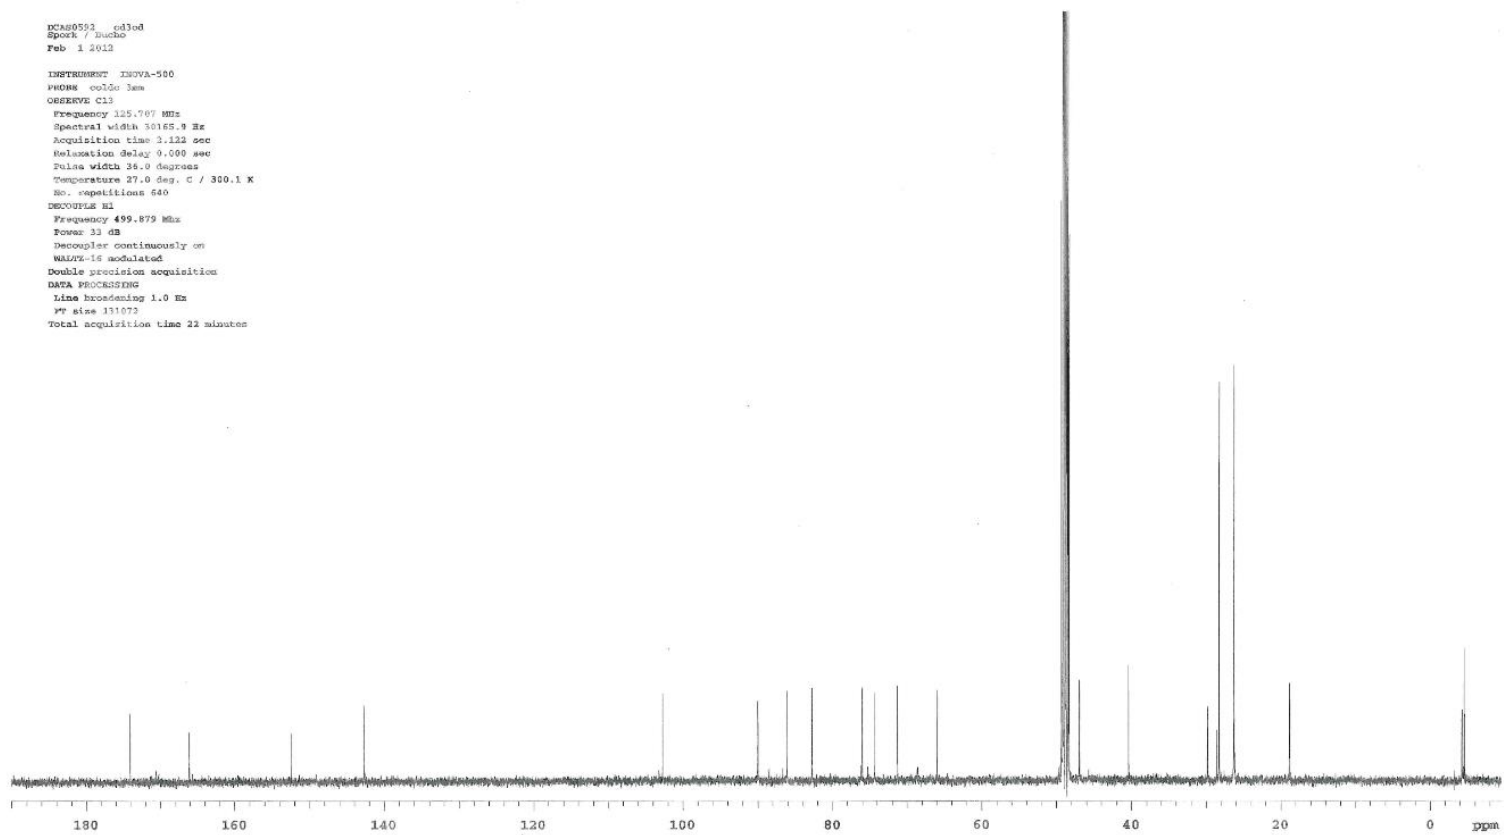

DCA0592 edited  
 Spork / Ducho

DATE: Feb 1 2012 FILENAME: ducho/dca0592\_5c

$^{13}\text{C}$  NMR spectrum of **21** (126 MHz,  $\text{CD}_3\text{OD}$ )

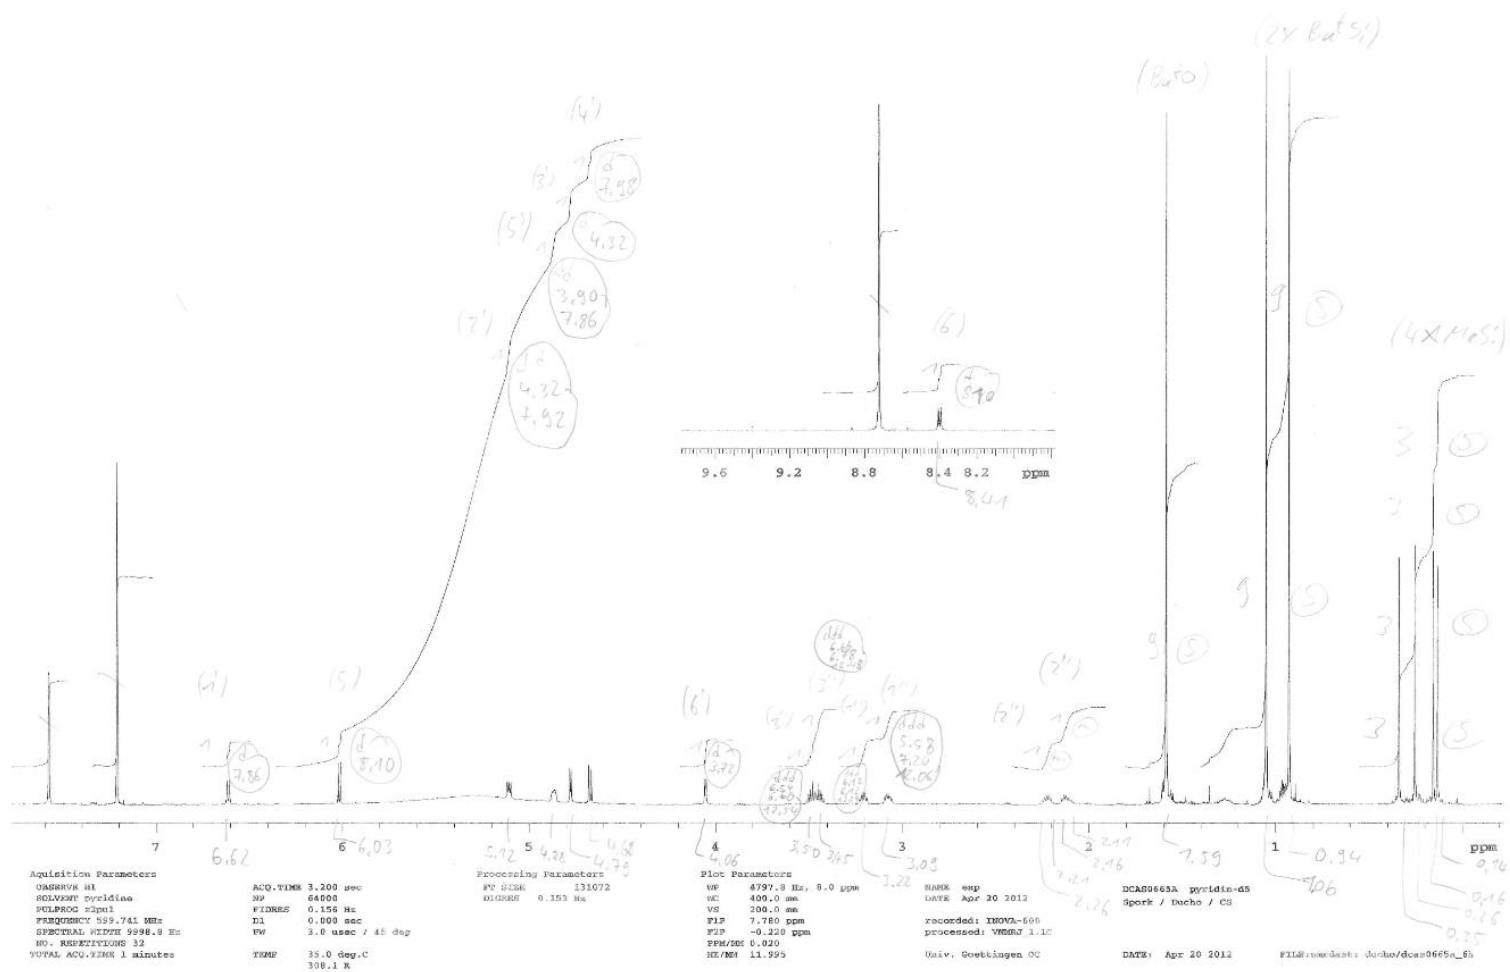

$^1\text{H}$  NMR spectrum of **22** (600 MHz, pyridine- $d_5$ , 35 °C)

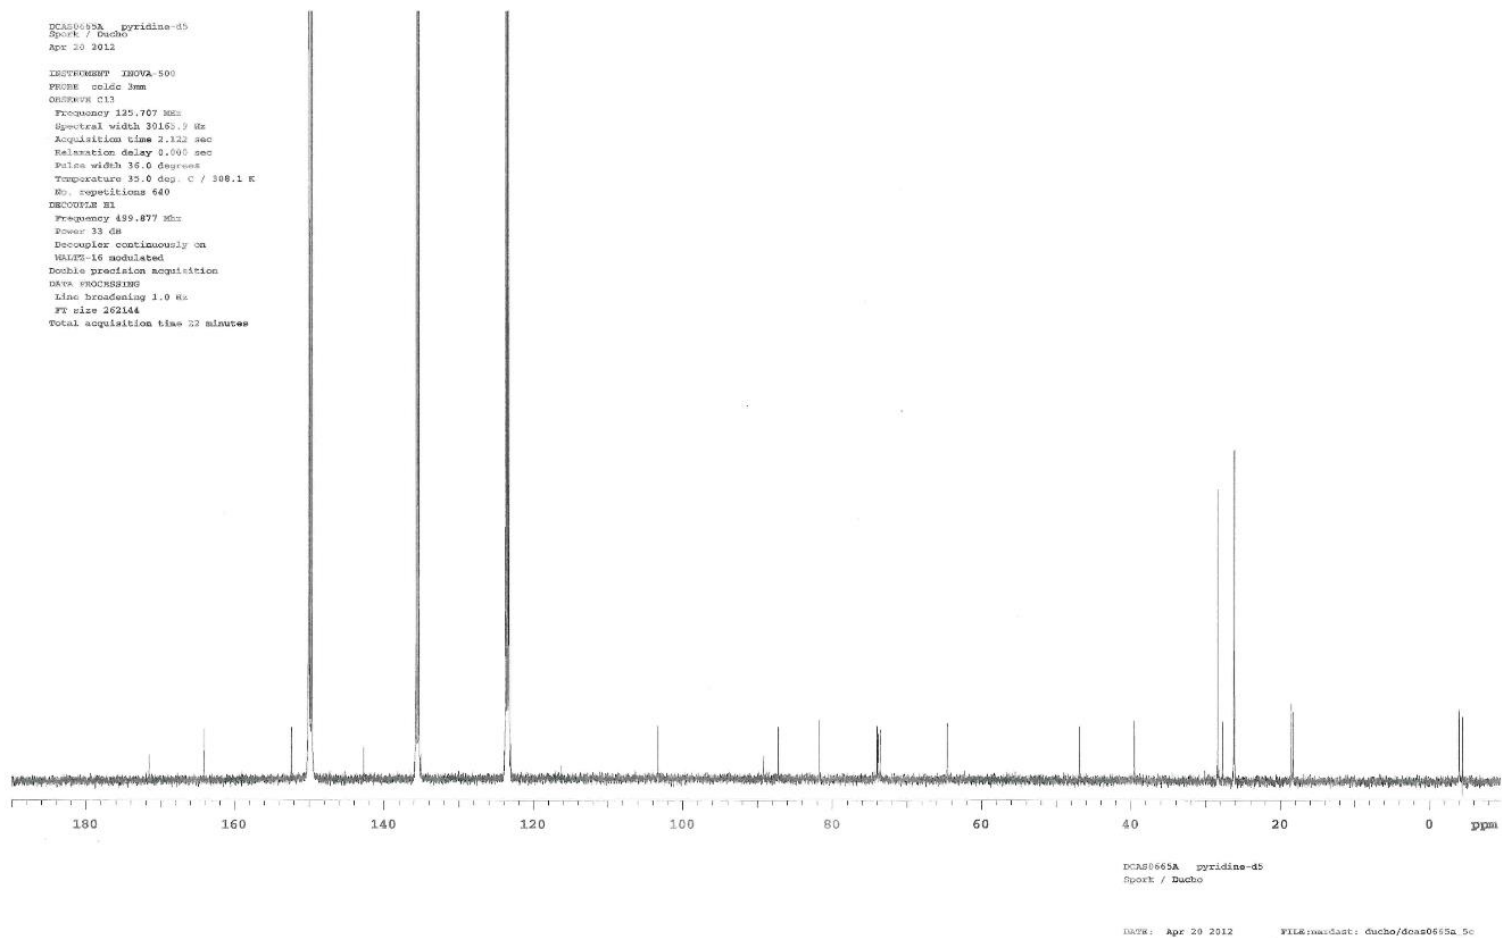

$^{13}\text{C}$  NMR spectrum of **22** (126 MHz, pyridine- $\text{d}_5$ , 35 °C)

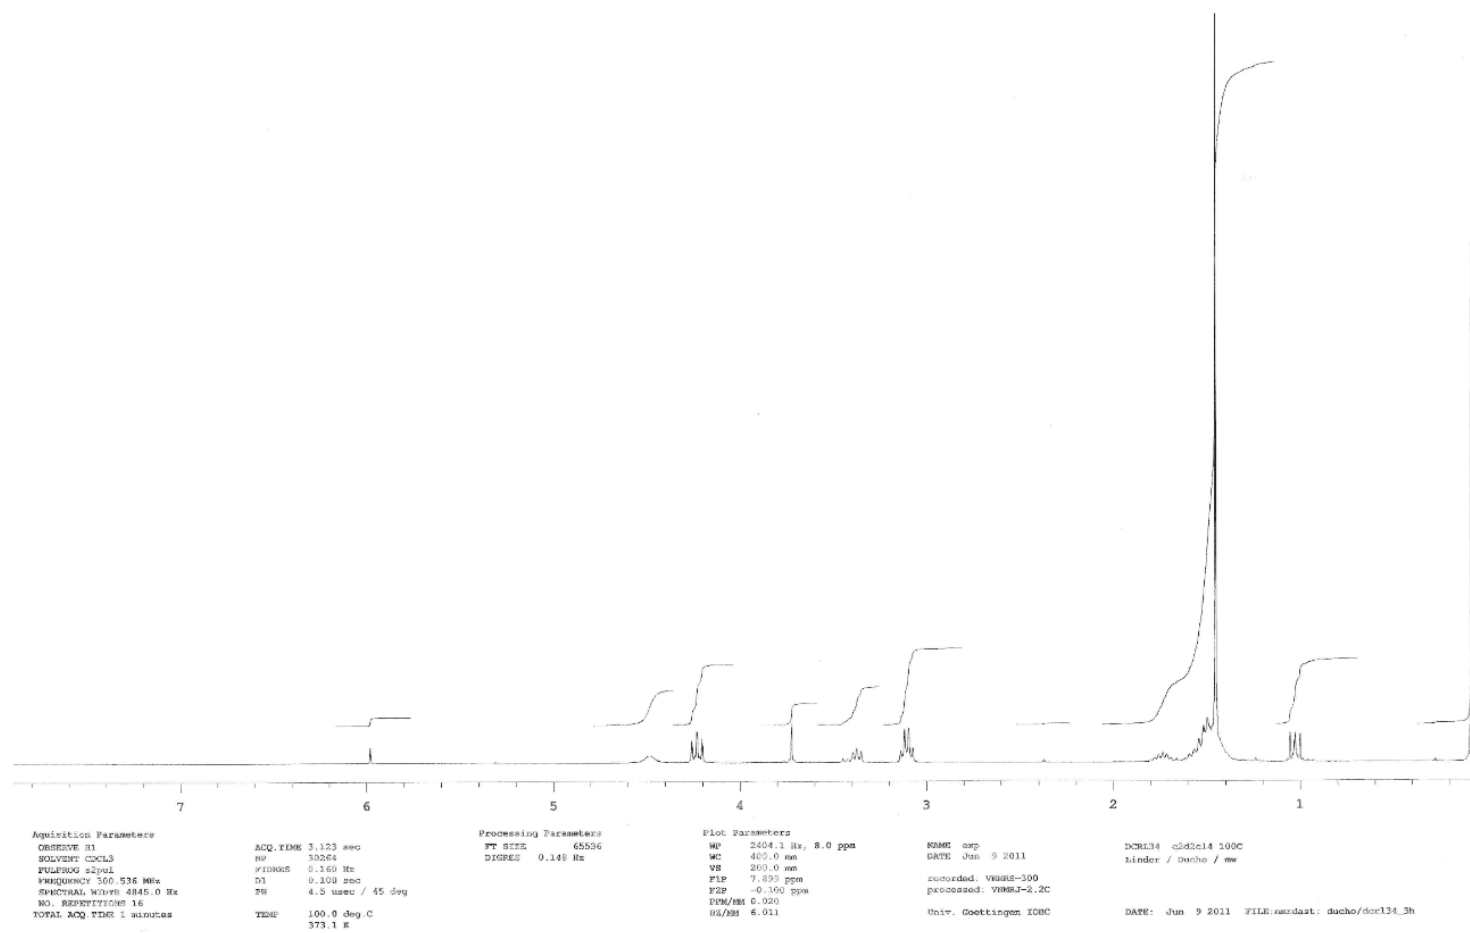

$^1\text{H}$ -NMR of **24** (300 MHz,  $\text{CD}_2\text{Cl}_4$ , 100 °C)

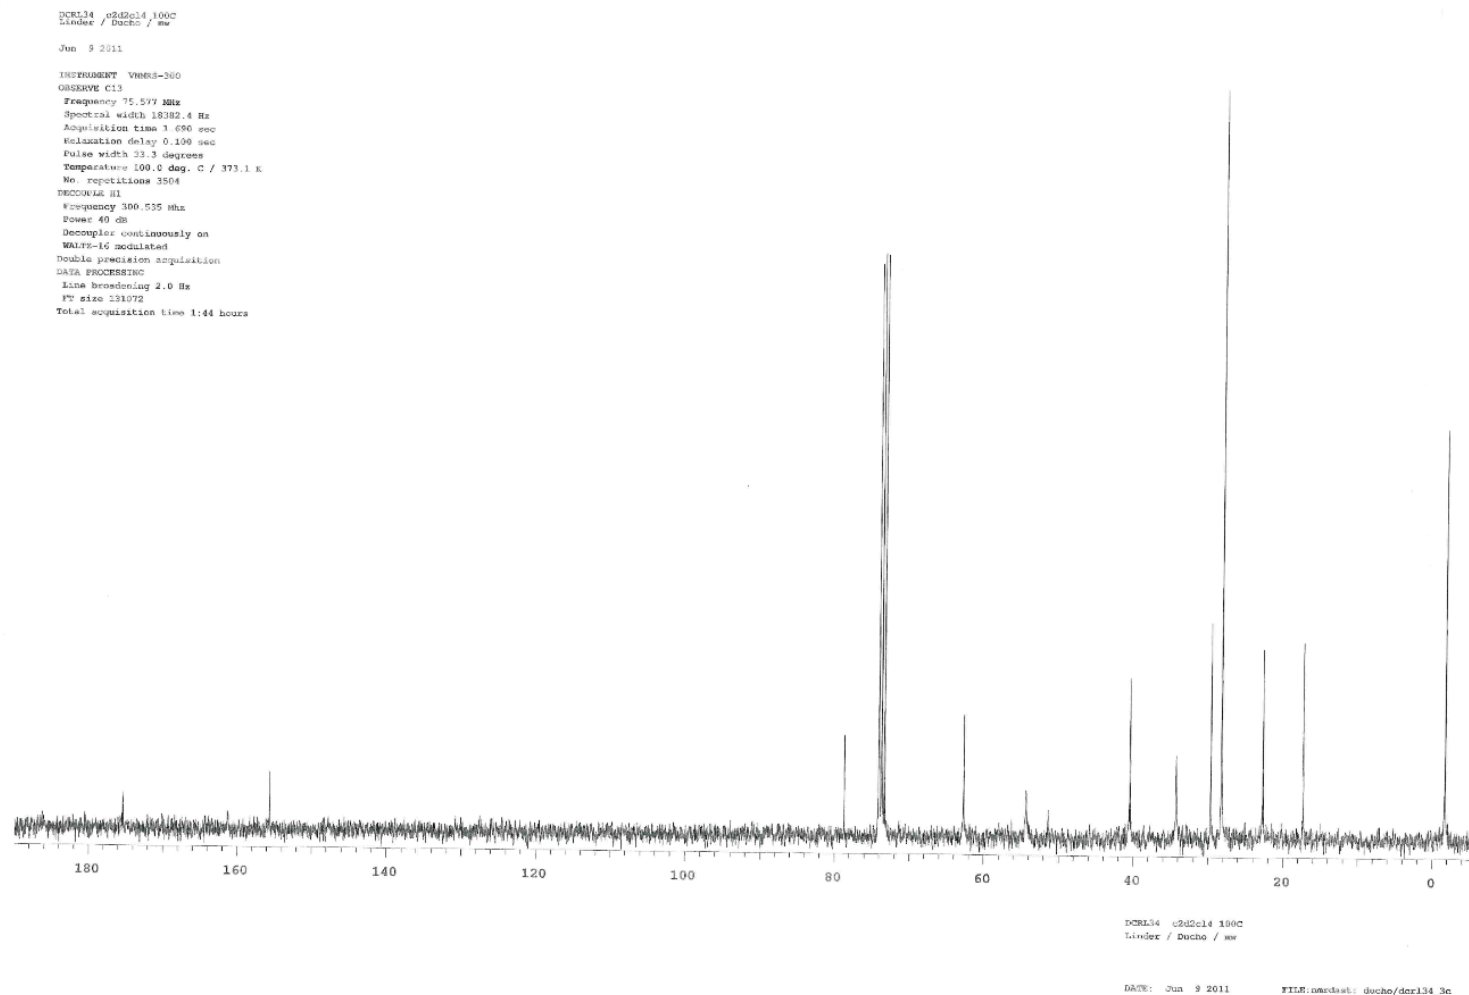

$^{13}\text{C}$  NMR spectrum of **24** (75 MHz,  $\text{CD}_2\text{Cl}_4$ , 100  $^\circ\text{C}$ )

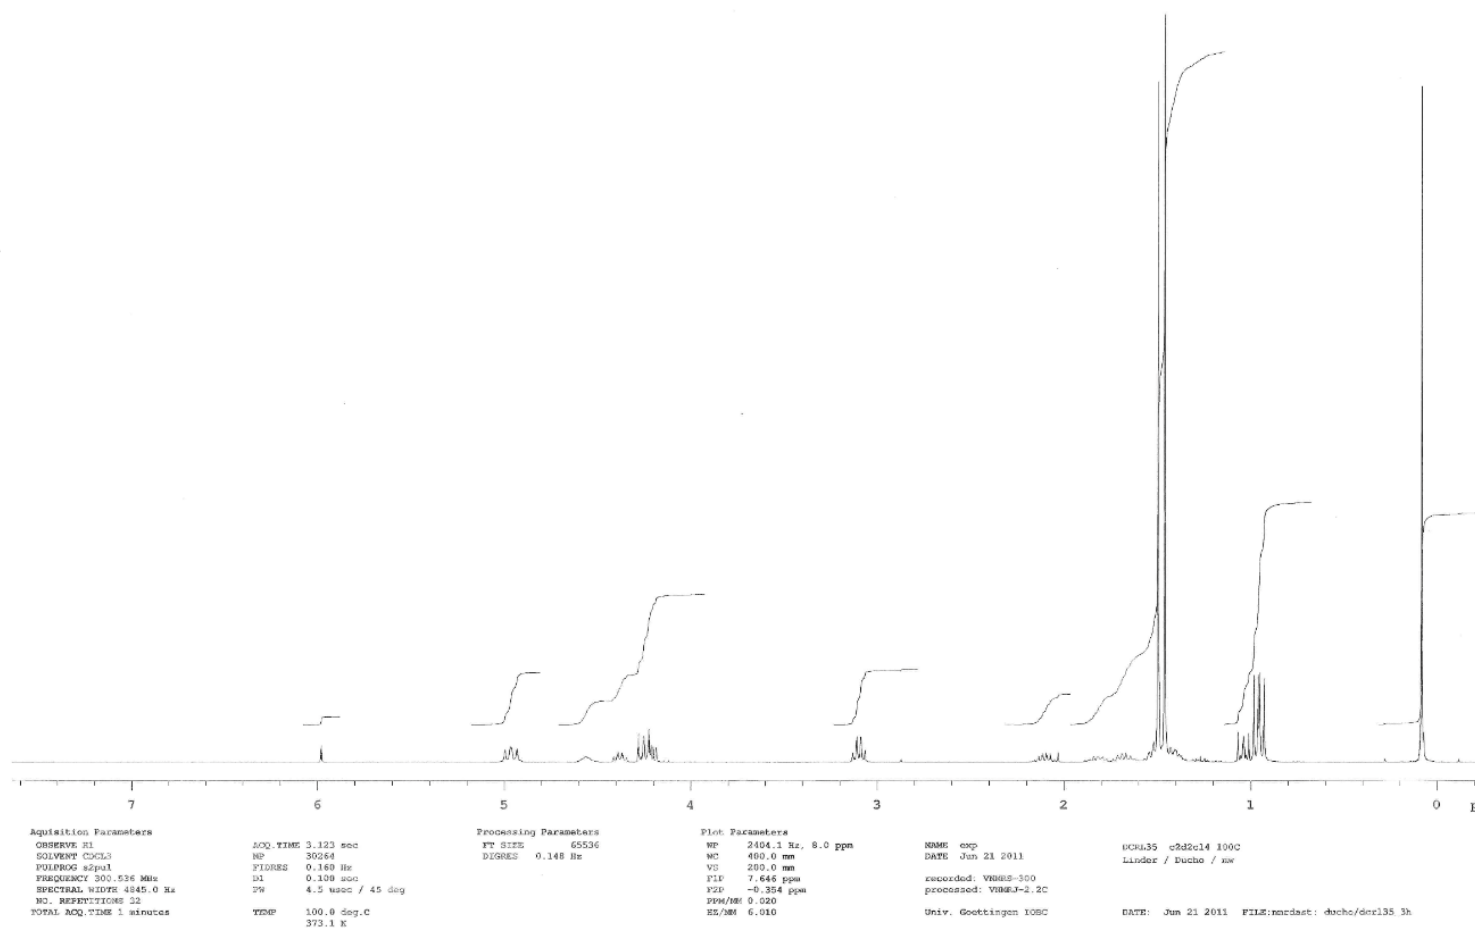

$^1\text{H}$  NMR spectrum of **26** (300 MHz,  $\text{CD}_2\text{Cl}_4$ , 100 °C)

DCL135 c2d2c14 100C  
 linder / Ducho / mw  
  
 Jun 21 2011  
  
 INCREMENT 00005-300  
 OBSERVE C13  
 Frequency 75.577 MHz  
 Spectral width 18392.4 Hz  
 Acquisition time 1.490 sec  
 Relaxation delay 6.100 sec  
 Pulse width 33.3 degrees  
 Temperature 100.0 deg. C / 373.1 K  
 No. repetitions 2880  
 DECOUPLER H1  
 Frequency 500.535 MHz  
 Power 40 dB  
 Decoupler continuously on  
 WALTZ-16 modulated  
 Double precision acquisition  
 DATA PROCESSING  
 Line broadening 1.0 Hz  
 F2 size 331072  
 Total acquisition time 1:25 hours

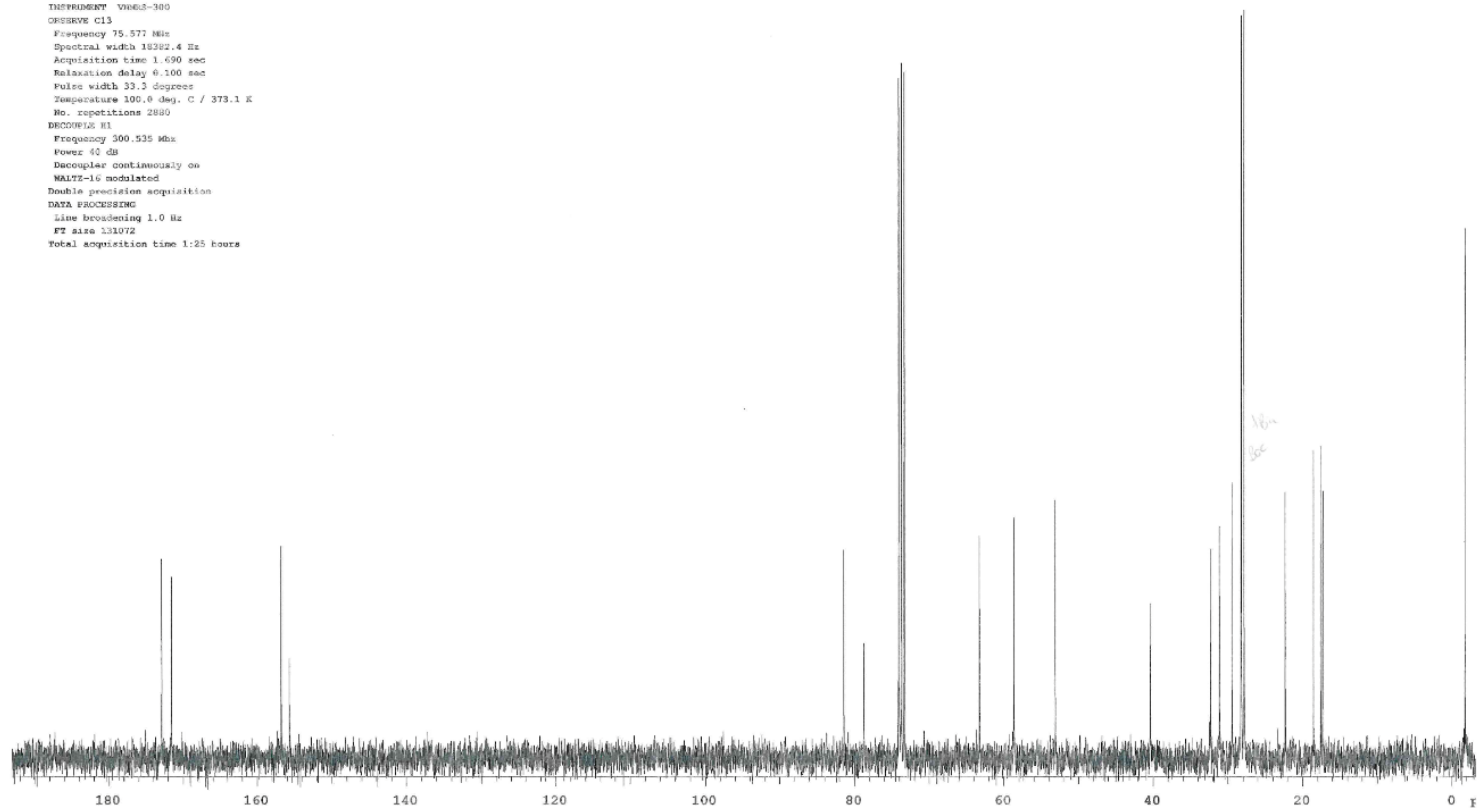

DCL135 c2d2c14 100C  
 linder / Ducho / mw

DATE: Jun 21 2011 FILE:ncrdest: ducho/dcl135 3c

$^{13}\text{C}$  NMR spectrum of **26** (75 MHz,  $\text{CD}_2\text{Cl}_4$ , 100 °C)



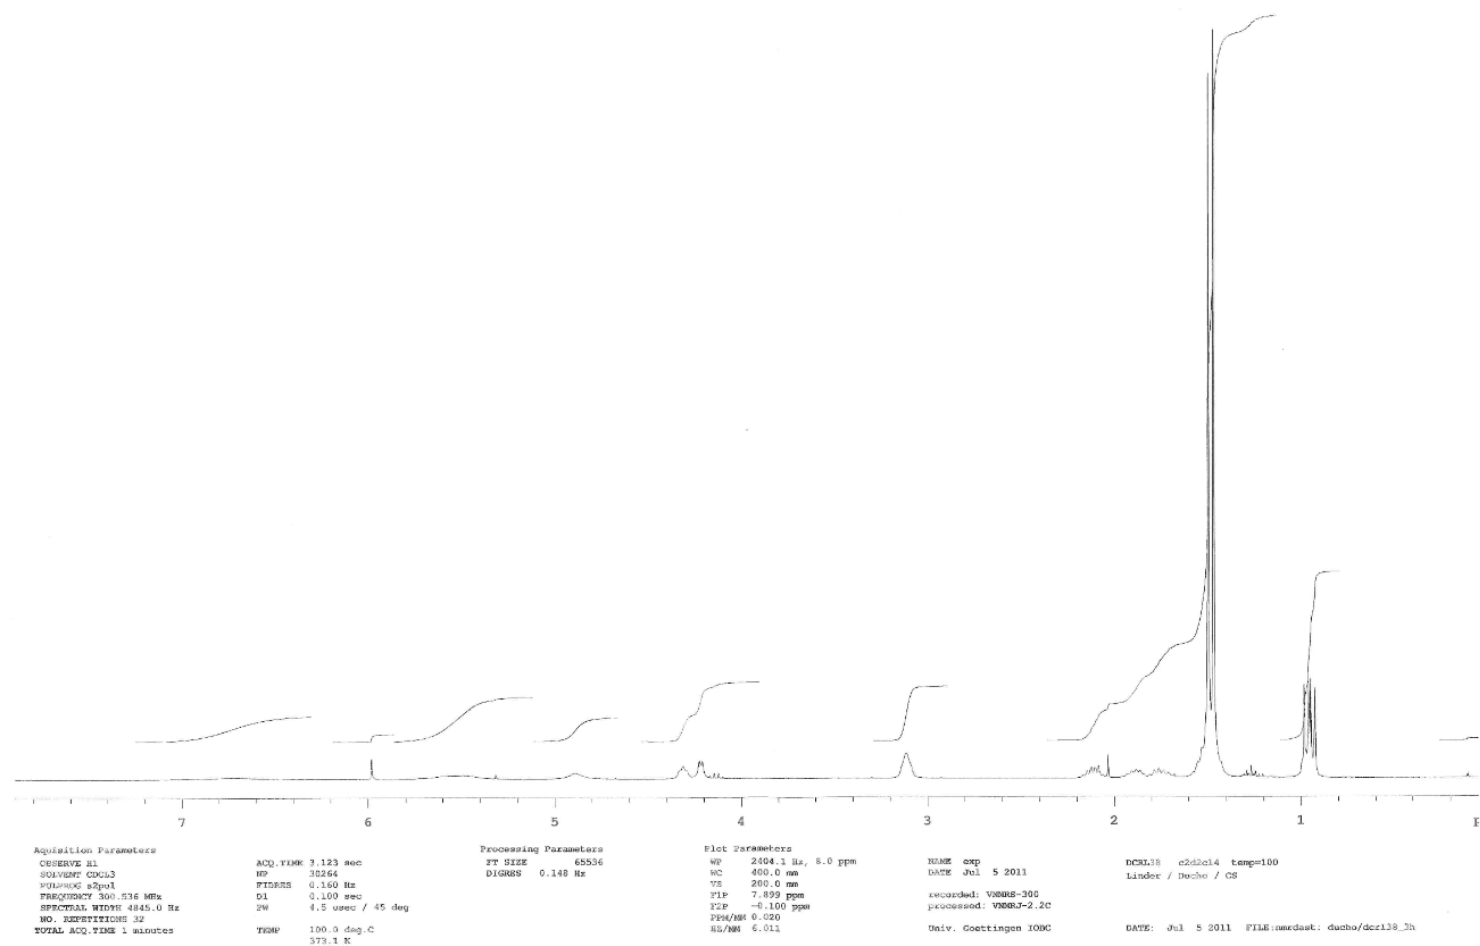

$^1\text{H}$  NMR spectrum of **27** (300 MHz,  $\text{CD}_2\text{Cl}_4$ , 100 °C)

dcr138 c2d2c14 50gradC  
 Lindar/Ducho  
 Jul 6 2011  
 INSTRUMENT INOVA-500  
 PROBE cddc 3mm  
 OBSERVE CL3  
 Frequency 125.707 MHz  
 Spectral width 30120.5 Hz  
 Acquisition time 2.125 sec  
 Relaxation delay 5.000 sec  
 Pulse width 16.0 degrees  
 Temperature 50.0 deg. C / 323.1 K  
 No. repetitions 640  
 DECOUPLE H1  
 Frequency 499.878 MHz  
 Power 12 dB  
 Decoupler continuously on  
 WALTZ-16 modulated  
 Double precision acquisition  
 DATA PROCESSING  
 Line broadening 2.0 Hz  
 FT size 262144  
 Total acquisition time 22 minutes

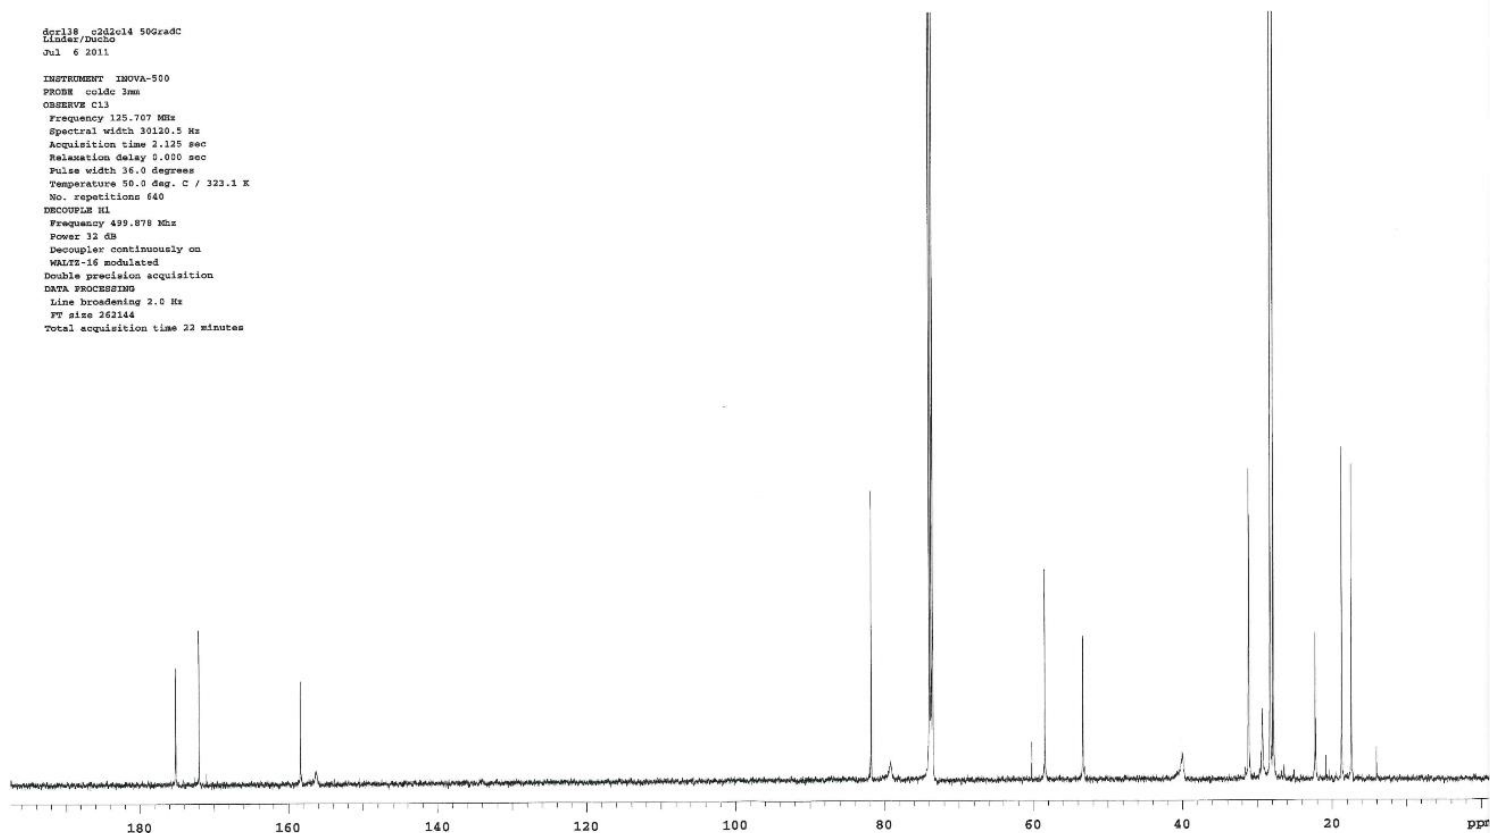

dcr138 c2d2c14 50GradC  
 Lindar/Ducho

DATE: Jul 6 2011 FILE:mrdata: ducho/dcr138\_5c

$^{13}\text{C}$  NMR spectrum of **27** (75 MHz,  $\text{CD}_2\text{Cl}_4$ , 100 °C)

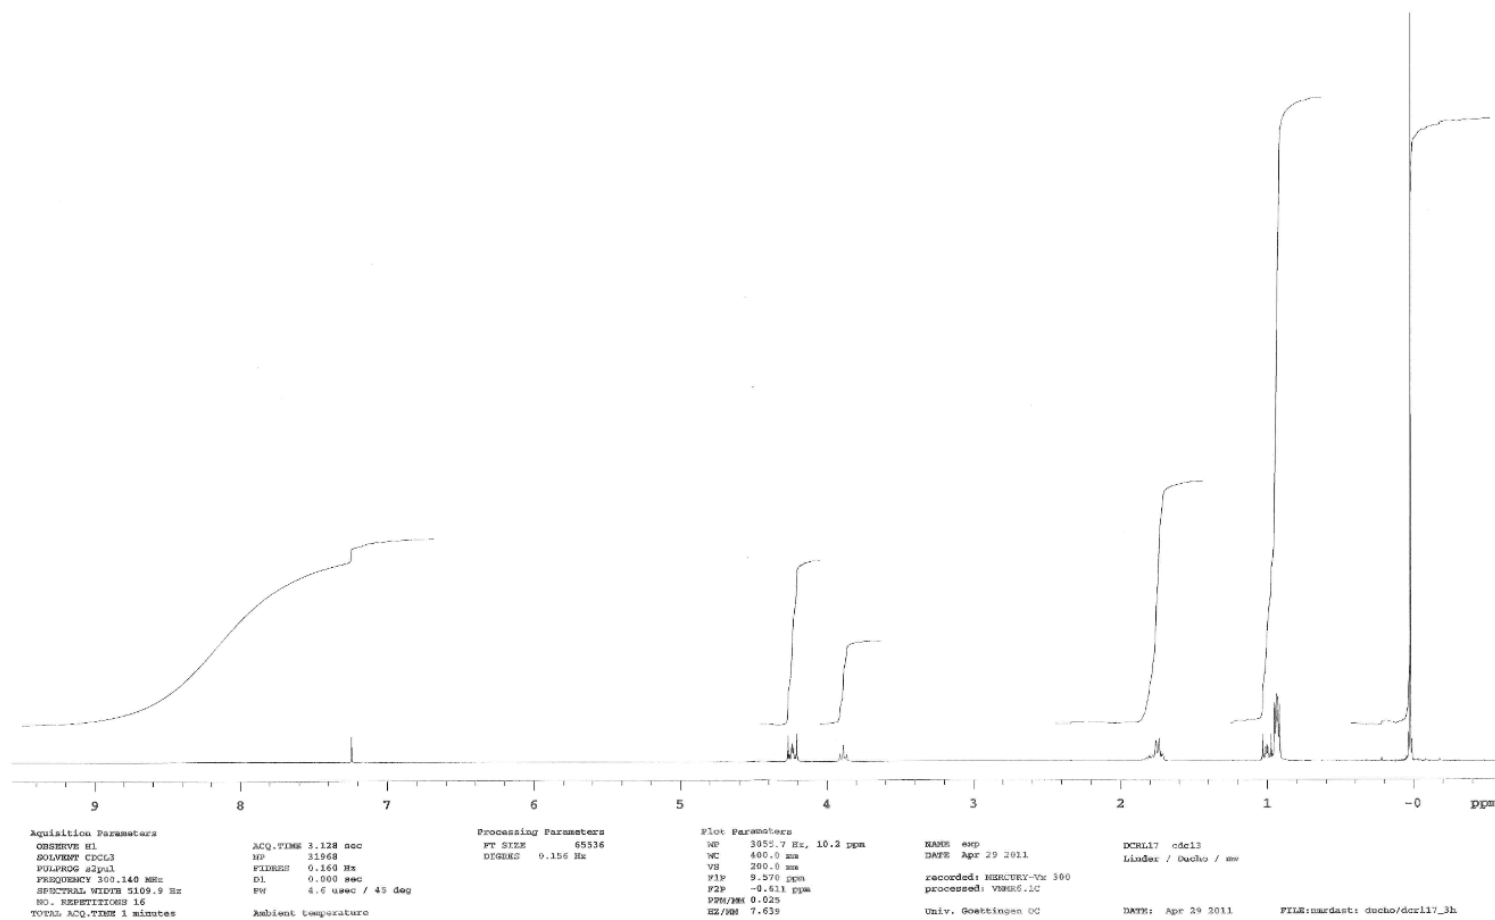

$^1\text{H}$  NMR spectrum of **28** (300 MHz,  $\text{CDCl}_3$ )

DCE117 cd13  
 kinder / Ducho / mw  
  
 Apr 29 2011  
  
 INSTRUMENT MERCURY-300  
 PROBE atb  
 OBSERVE C13  
 Frequency 75.478 MHz  
 Spectral width 19867.9 Hz  
 Acquisition time 1.696 sec  
 Relaxation delay 0.000 sec  
 Pulse width 32.5 degrees  
 Ambient temperature  
 No. repetitions 6400  
 DECOUPLE H1  
 Frequency 300.139 MHz  
 Power 37 dB  
 Decoupler continuously on  
 WALTZ-16 modulated  
 Double precision acquisition  
 DATA PROCESSING  
 Line broadening 1.0 Hz  
 FT size 131072  
 Total acquisition time 3:00 hours

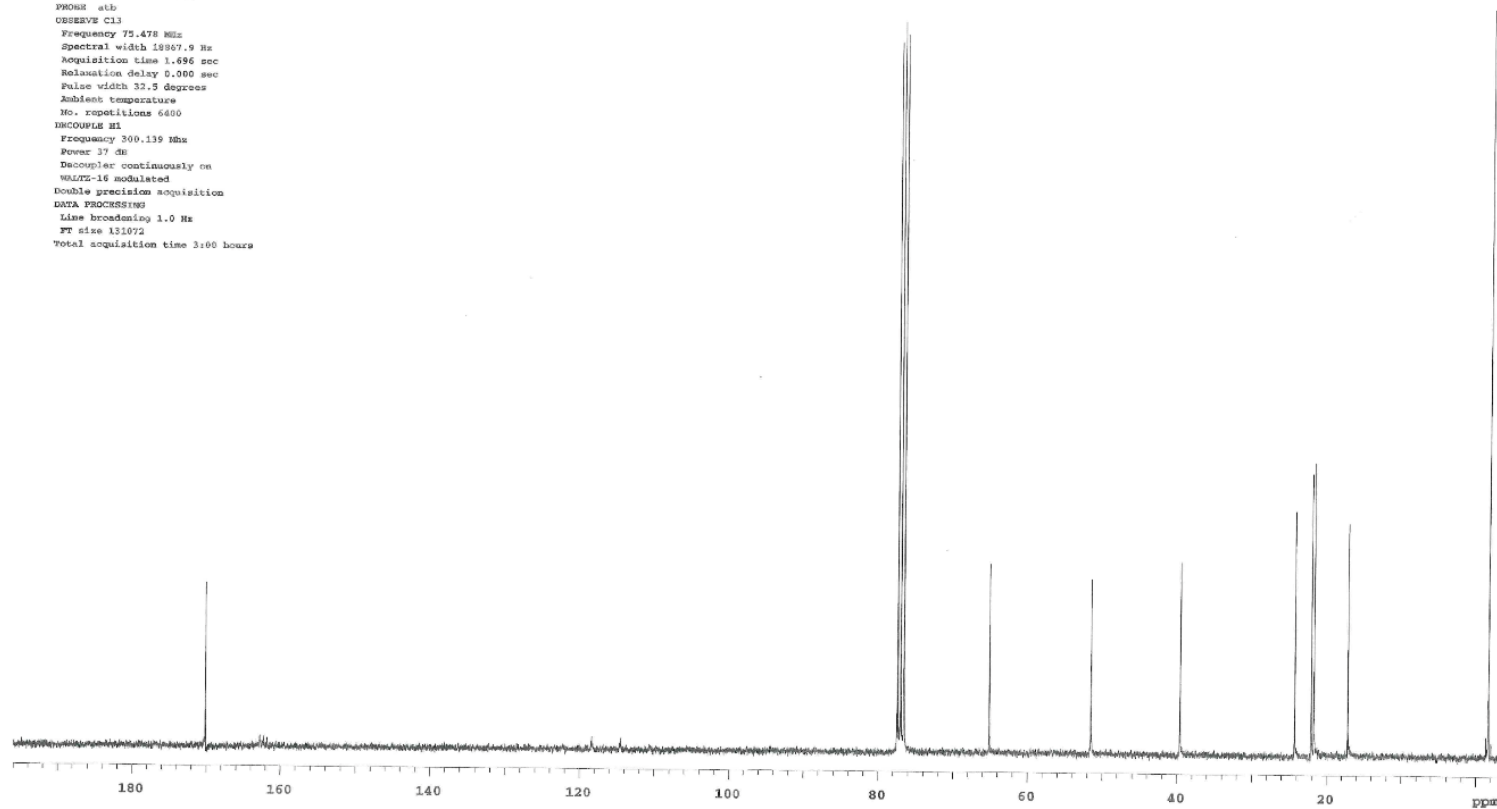

DCE117 cd13  
 kinder / Ducho / mw

DATE: Apr 29 2011      FILE:mrdest: ducho/dor117\_3c

$^{13}\text{C}$  NMR spectrum of **28** (75 MHz,  $\text{CDCl}_3$ )

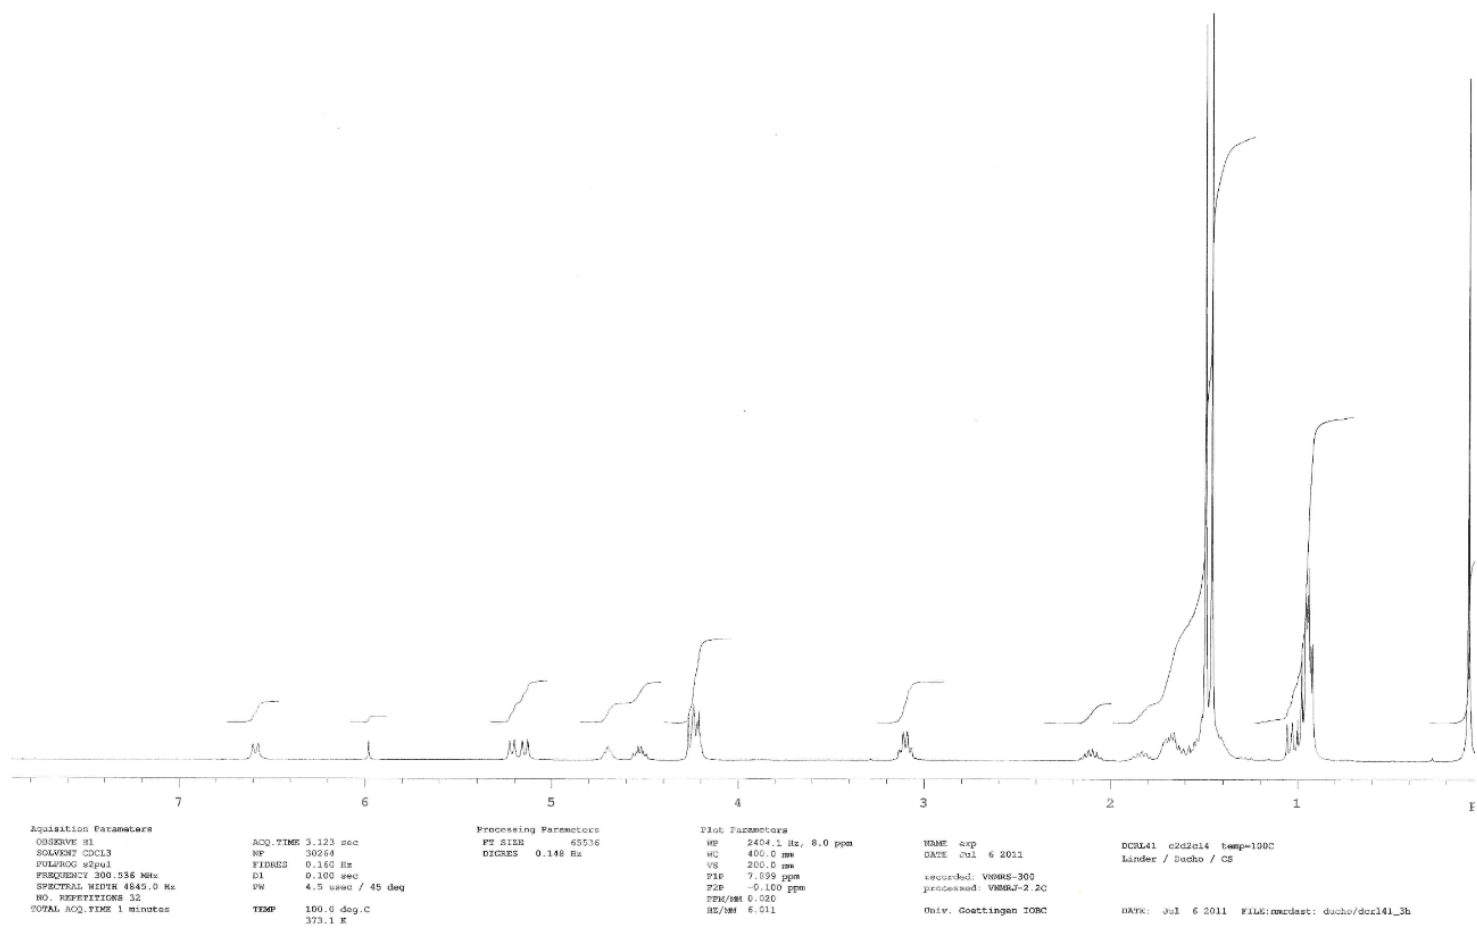

$^1\text{H}$  NMR spectrum of **29** (300 MHz,  $\text{CD}_2\text{Cl}_4$ , 100 °C)

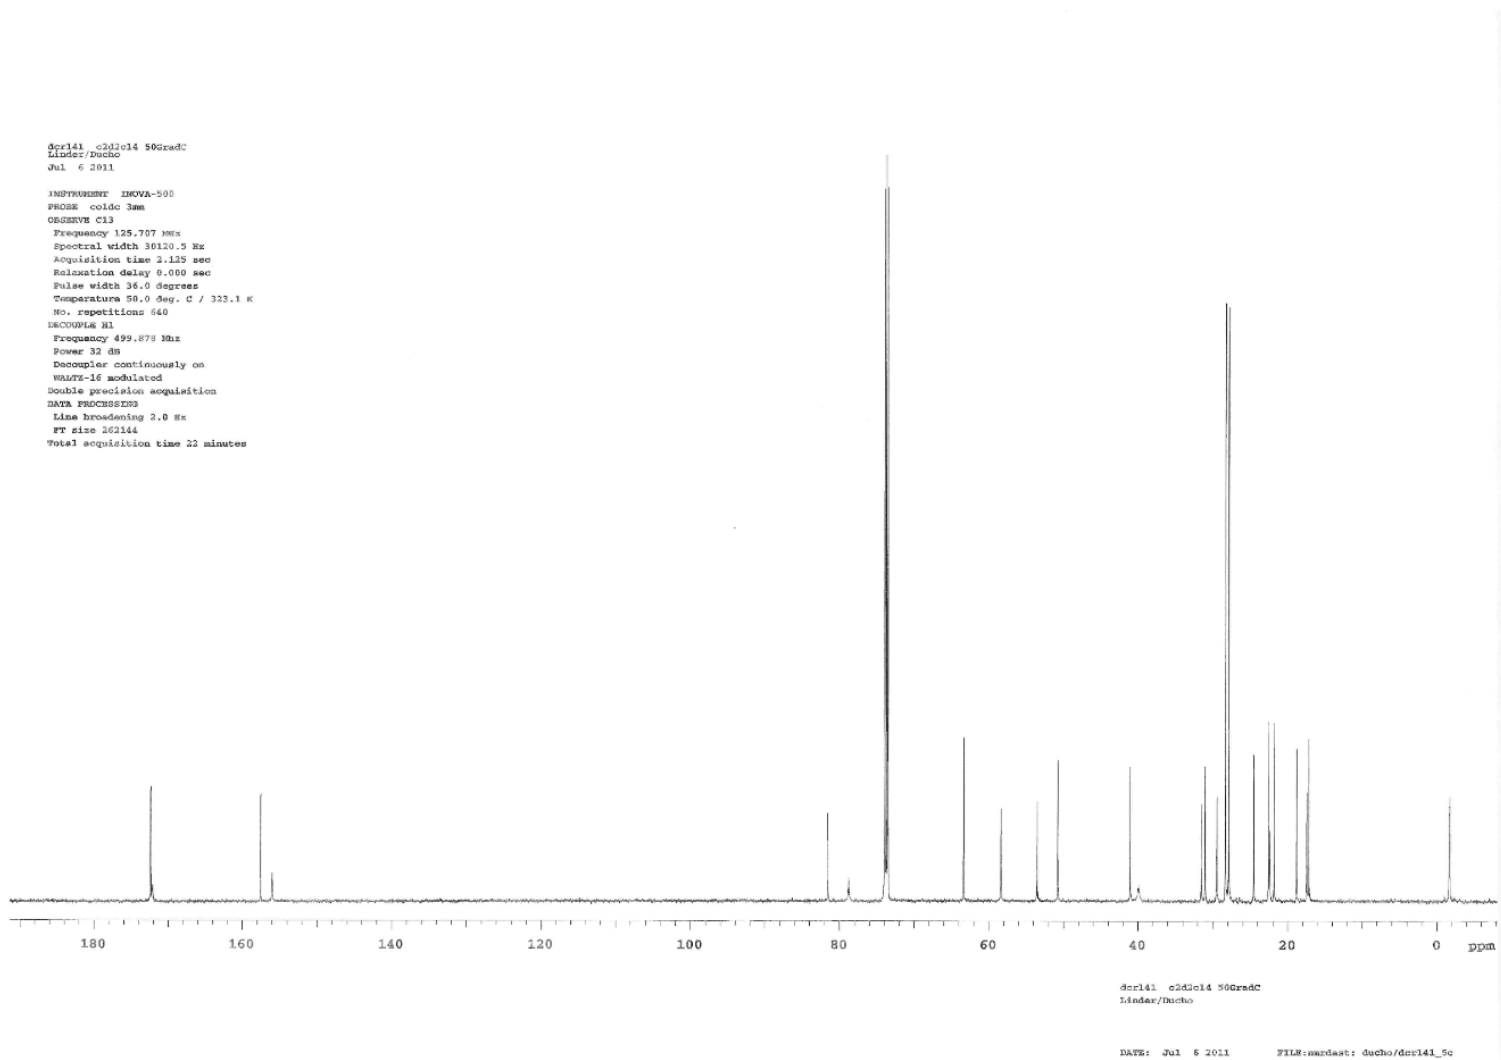

$^{13}\text{C}$  NMR spectrum of **29** (75 MHz,  $\text{CD}_2\text{Cl}_4$ , 100  $^\circ\text{C}$ )



DCAS0577 cd13  
 Sport / Ducho / mw  
 Jan 25 2012  
  
 INSTRUMENT INOVA-500  
 PROBE cpdco 3mm  
 OBSERVE C13  
 Frequency 125.767 MHz  
 Spectral width 30165.5 Hz  
 Acquisition time 2.122 sec  
 Relaxation delay 0.000 sec  
 Pulse width 36.0 degrees  
 Temperature 27.0 deg. C / 300.1 K  
 No. repetitions 640  
 DECOUPLE H1  
 Frequency 499.877 MHz  
 Power 15 dB  
 Decoupler continuously on  
 SALT-16 modulated  
 Double precision acquisition  
 DATA PROCESSING  
 Line broadening 1.0 Hz  
 vt size 131072  
 Total acquisition time 22 minutes

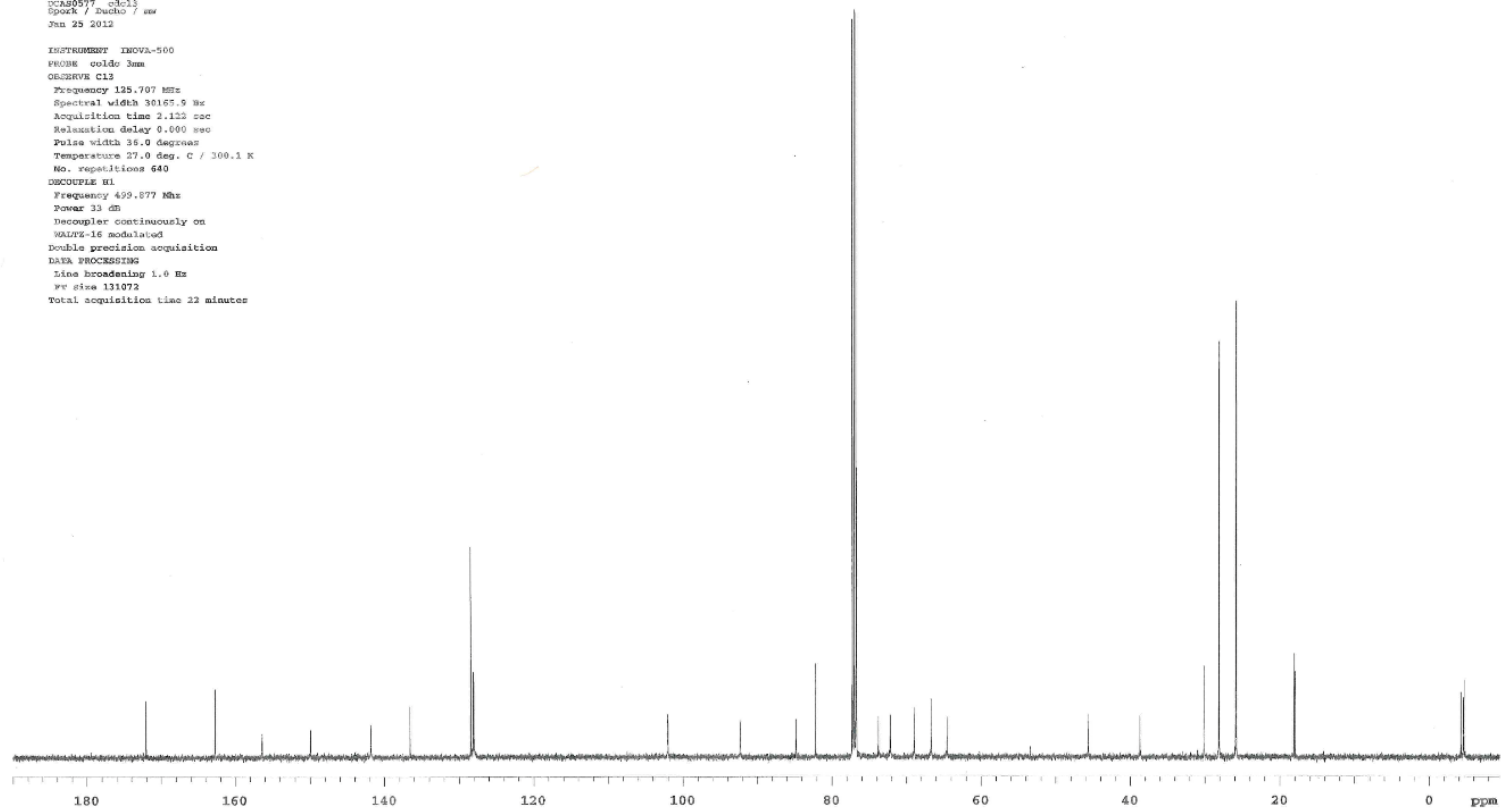

DCAS0577 cd13  
 Sport / Ducho / mw

DATE: Jan 25 2012 FILE:mardest: ducho/dcas0577\_5c

$^{13}\text{C}$  NMR of **33** (126 MHz,  $\text{CDCl}_3$ )





DCA60596A dmsd-05  
Spork / Duchs / av  
Feb 10 2012

INSTRUMENT INOVA-500  
PROBE cp100 5mm  
CROSSPOLE C13  
Frequency 125.767 MHz  
Spectral width 20165.9 Hz  
Acquisition time 2.122 sec  
Relaxation delay 0.000 sec  
Pulse width 16.0 degrees  
Temperature 35.0 deg. C / 308.1 K  
No. repetitions 1920

DECOUPLE H1  
Frequency 499.879 MHz  
Power 32 dB  
Decoupler continuously on  
WALTZ-16 modulated  
Double precision acquisition

DATA PROCESSING  
Time broadening 1.0 Hz  
FT size 131072  
Total acquisition time 1:07 hours

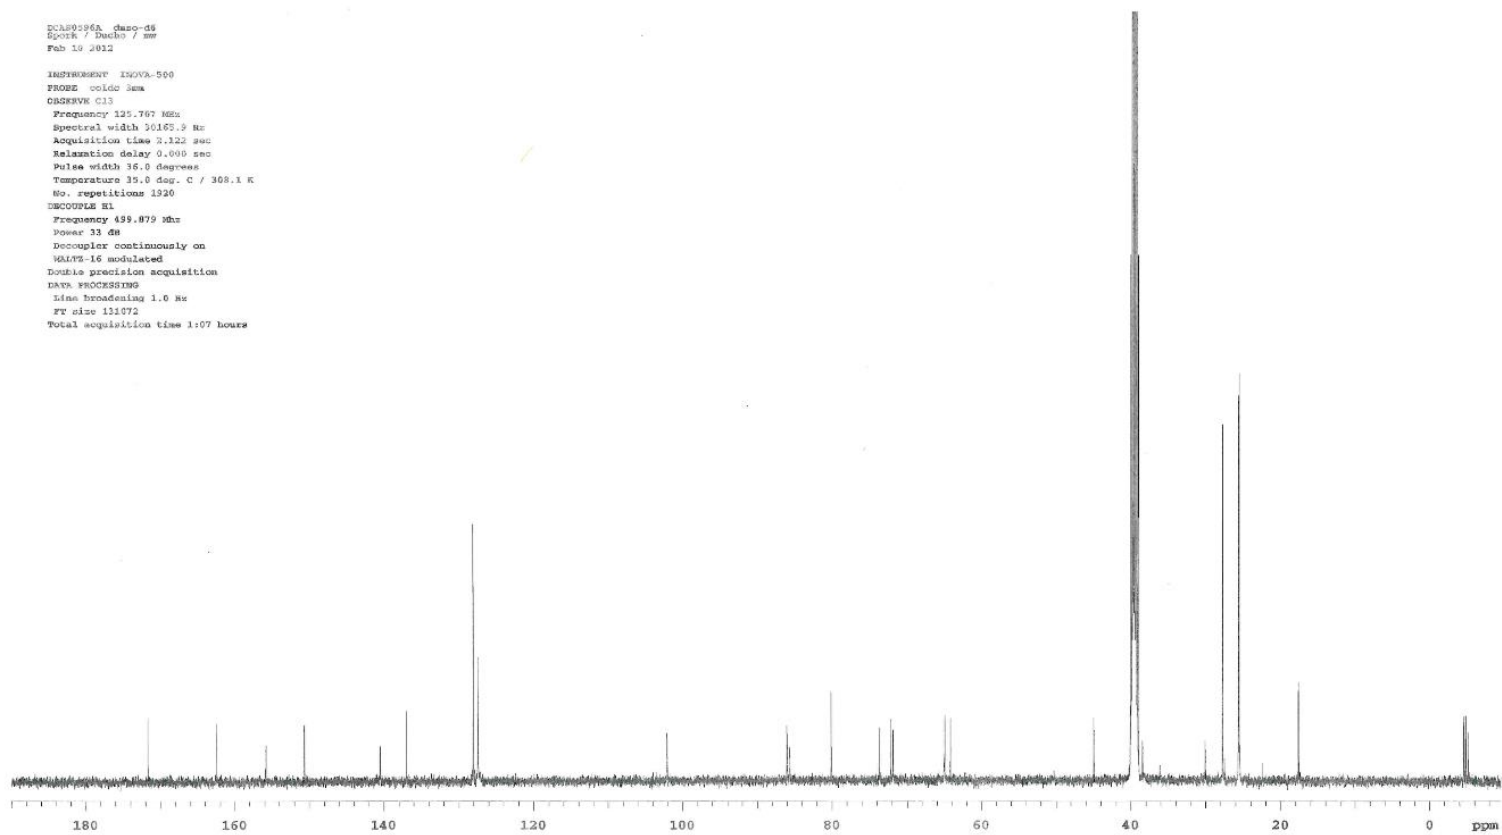

DCA60596A dmsd-05  
Spork / Duchs / av

DATE: Feb 10 2012 FILE:msdata: duchs/dcas6596a\_5c

$^{13}\text{C}$  NMR spectrum of **35** (126 MHz, DMSO- $\text{d}_6$ , 35 °C)

## References

1. Marfey, P. Determination of D-amino acids. II. Use of a bifunctional reagent, 1,5-difluoro-2,4-dinitrobenzene. *Carlsberg Res. Commun.* **1984**, 49, 591, doi:10.1007/BF02908688.
2. Tanino, T.; Ichikawa, S.; Shiro, M.; Matsuda, A. Total Synthesis of (–)-Muraymycin D2 and Its Epimer. *J. Org. Chem.* **2010**, 75, 1366-1377, doi:10.1021/jo9027193.
3. Bhushan, R.; Brückner, H. Marfey's reagent for chiral amino acid analysis: A review. *Amino Acids* **2004**, 27, 231-247, doi:10.1007/s00726-004-0118-0.
